# Supplementary material for: Mapping of the gene network that regulates glycan clock of ageing
Source: publisher site journal article supplement (doi:10.18632/aging.205106), 2023-12-26
Supplement: Supplementary file [file aging-v15i24-205106-supplementary-material-SD2.pdf]

## SUPPLEMENTARY FIGURES

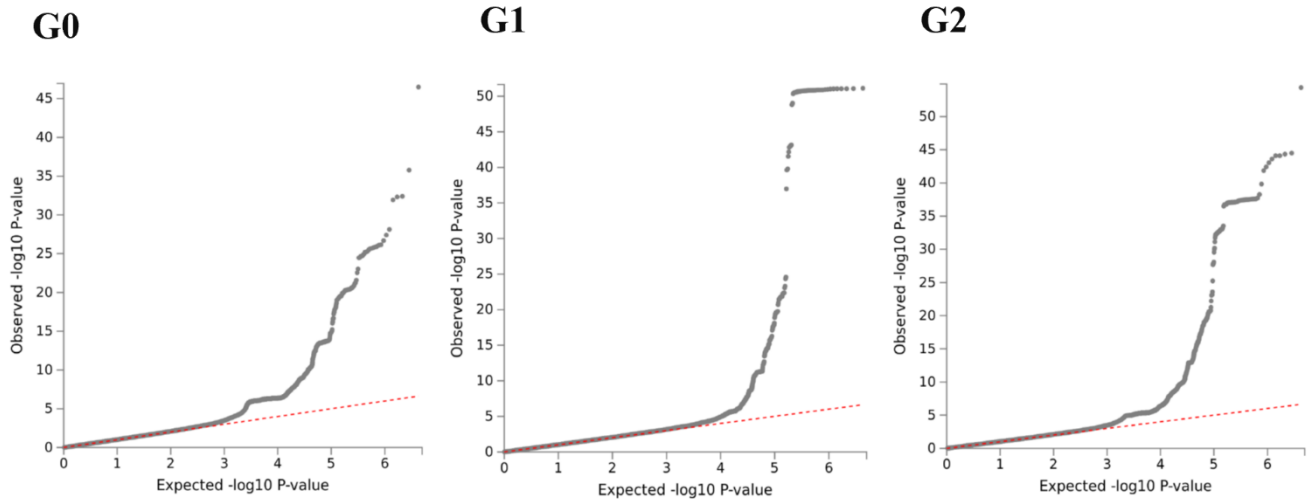

**Supplementary Figure 1. QQ plots of association analysis for G0, G1 and G2 traits.** Genomic inflation ( $\lambda$ ) for meta-analysis was 1.02, 1.01 and 1.03 for G0, G1 and G2, respectively.

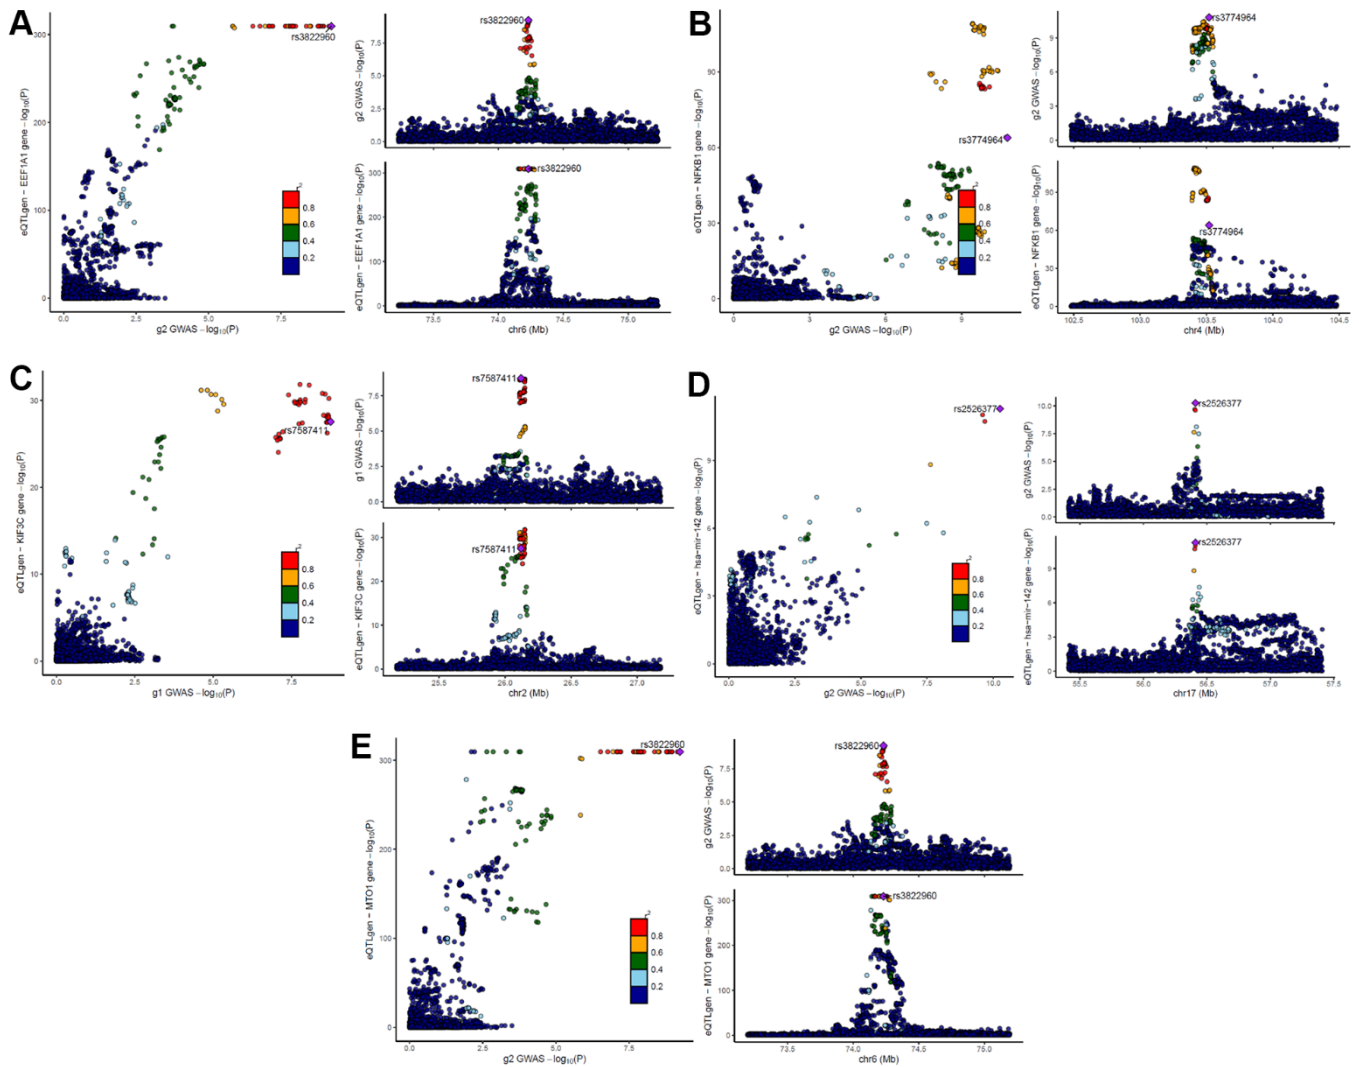

**Supplementary Figure 2. IgG galactosylation and eQTL association plots at loci with colocalization (PP4 > 75%).** Association plot for IgG galactosylation GWAS and eQTL are shown in the top right and bottom right corners, respectively; x-axis shows the chromosomal position, y-axis shows  $-\log_{10}(p\text{-value})$  of the association. Correlation of  $-\log_{10}(p\text{-values})$  for IgG galactosylation GWAS and eQTL are shown on left side. (A) Colocalization in *EEF1A1* locus (prioritized genes *EEF1A1* and *MTO1*), (B) Colocalization in *NFKB1* locus (prioritized genes *NFKB1* and *MANBA*), (C) Colocalization in *KIF3C* locus (prioritized gene *KIF3C*), (D) Colocalization in *hsa-mir-142* locus (prioritized genes *BZRAP1*, *SUPT4H1* and *RAD5C1*), (E) Colocalization in *MTO1* locus (prioritized genes *EEF1A1* and *MTO1*).

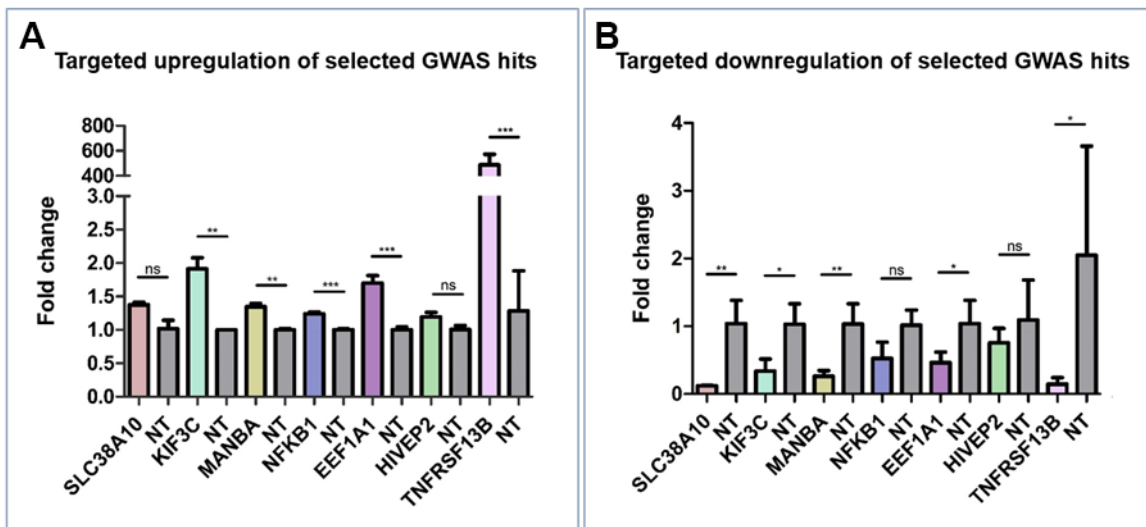

**Supplementary Figure 3. Upregulation and downregulation of selected GWAS hits.** Selected GWAS hits associated with IgG galactosylation (*SLC38A10*, *KIF3C*, *MANBA*, *NFKB1*, *EEF1A1*, *HIVEP2* and *TNFRSF13B*) were targeted in dCas9-VPR and dCas9-KRAB monoclonal cell lines. Samples containing non-targeting gRNAs served as controls. Changes of transcript levels are given as fold change values. (A) Targeting of selected GWAS hits with specific gRNA molecules in dCas9-VPR cell line resulted in significant increase of transcript levels of all loci except for *SLC38A10* and *HIVEP2*. (B) Targeting of the same genes in dCas9-KRAB cell line resulted in significant downregulation of all genes except for *NFKB1* and *HIVEP2*. Statistical significance: \* $<0.05$ ; \*\* $<0.01$ ; \*\*\* $<0.001$ ; ns, not significant.

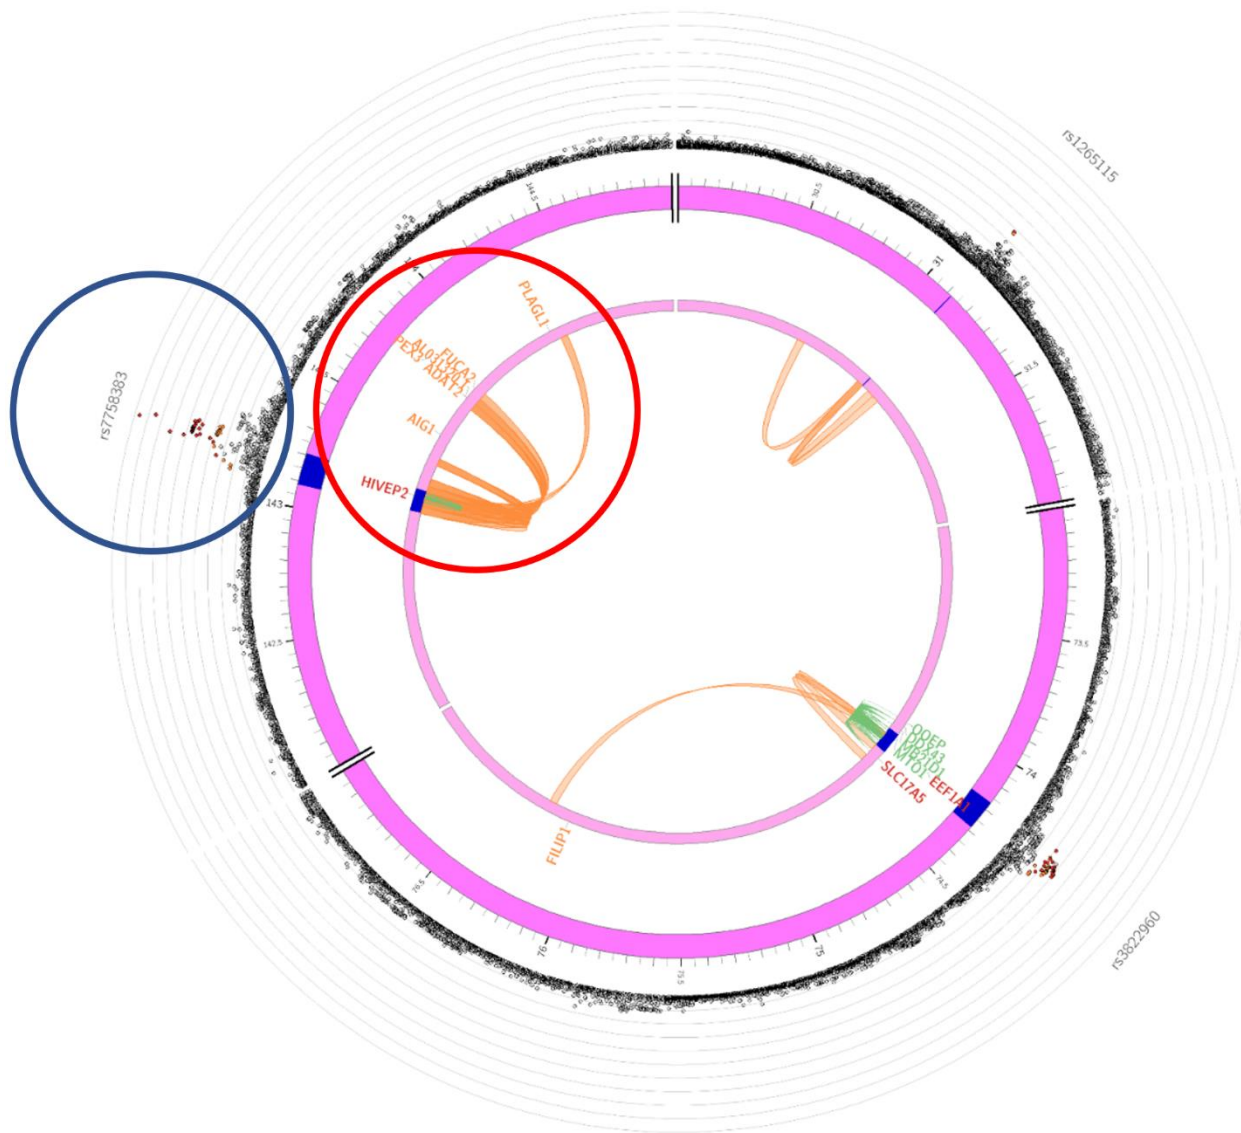

**Supplementary Figure 4. Chromatin interaction map based on Hi-C data for GM12878 cell line (GSE87112) for chr6:143088071-143206826 locus indicating *FUCA2* and 4 other genes mapped via chromatin interaction with genetic variants in *HIVEP2* locus. Blue circle denotes the defined genomic locus; red circle denotes genes mapped via chromatin interaction mapping by FUMA.**

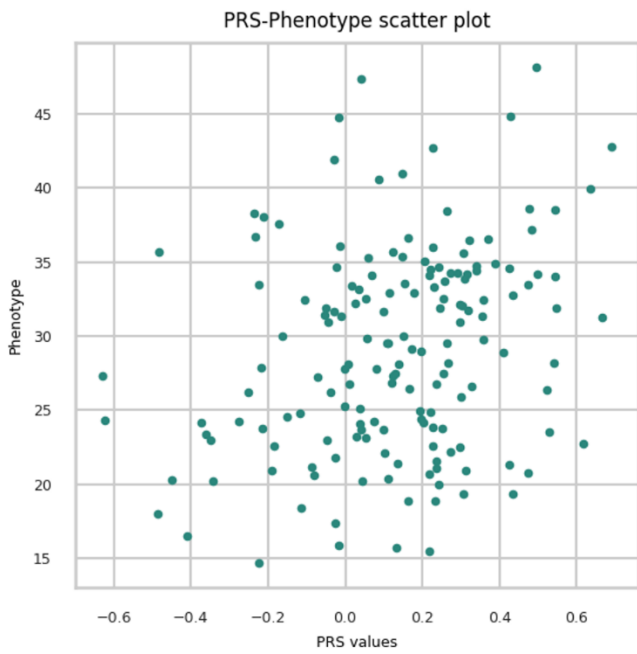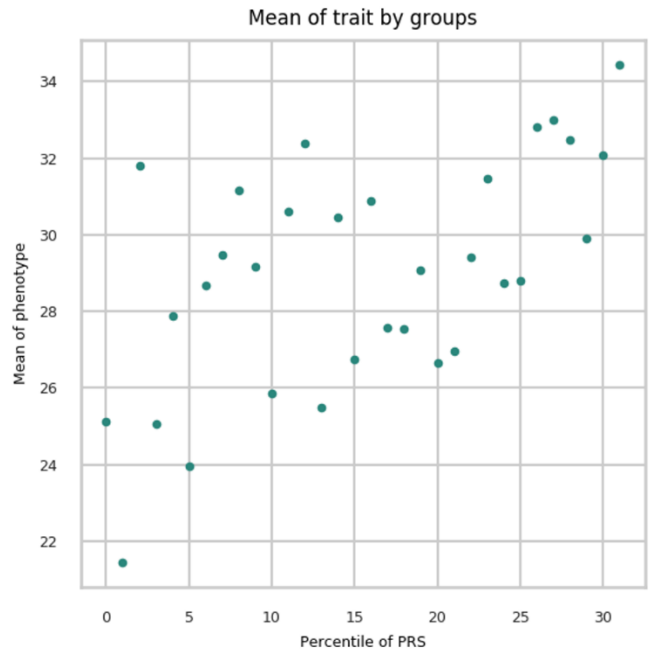

**Supplementary Figure 5. PRS-Phenotype scatter plot (G0) and mean of trait by groups.** The graph on the left-hand side shows the dependence of phenotype values (G0) on PRS values. The graph on the right-hand side is data stratified into 30 groups according to the PRS percentile. The Y-axis shows the average value of the trait for the group, the X-axis shows the group number.

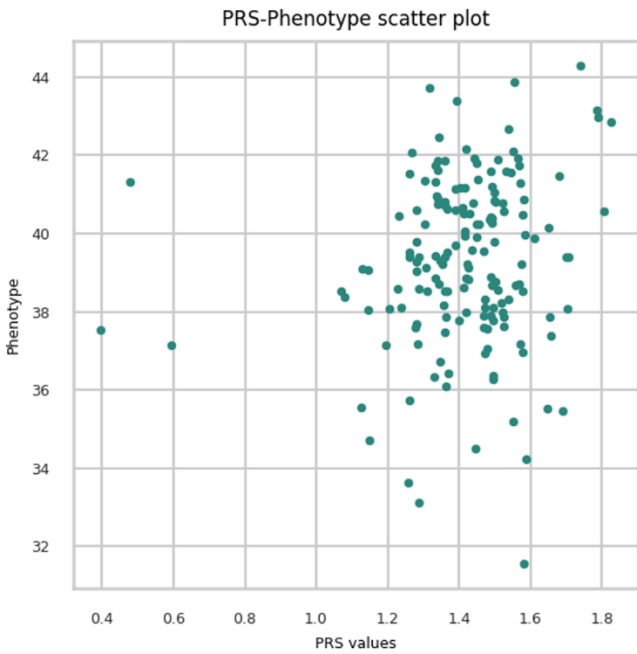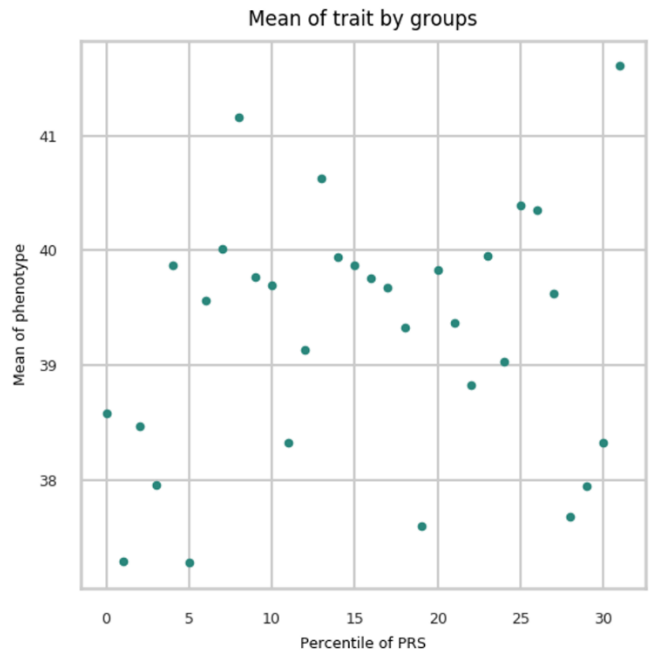

**Supplementary Figure 6. PRS-Phenotype scatter plot (G1) and mean of trait by groups.** The graph on the left-hand side shows the dependence of phenotype values (G1) on PRS values. The graph on the right-hand side shows data stratified into 30 groups according to the PRS percentile. The Y-axis shows the average value of the trait for the group, the X-axis shows the group number.

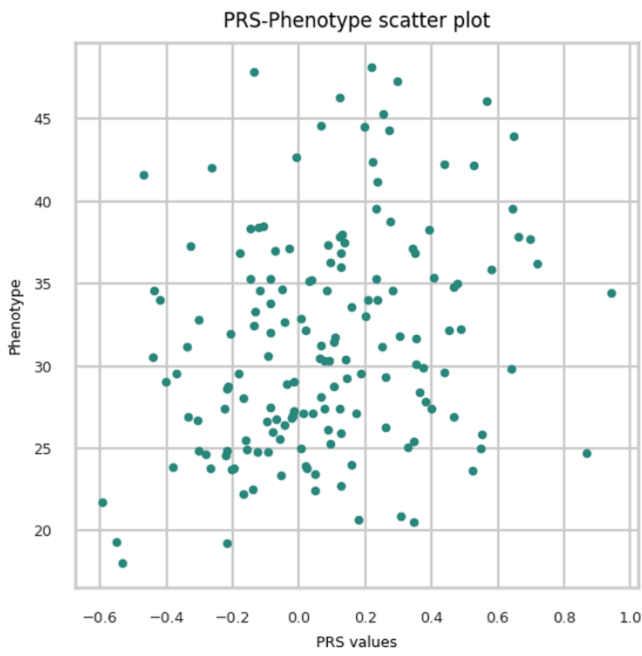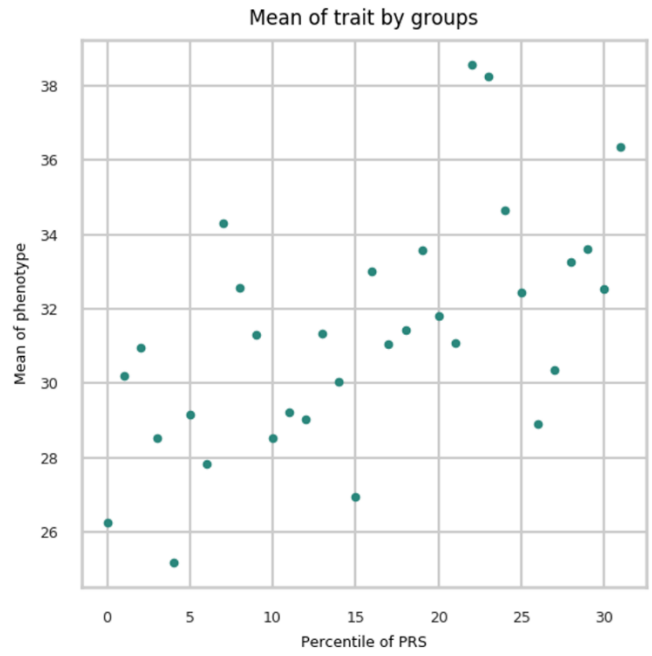

**Supplementary Figure 7. PRS-Phenotype scatter plot (G2) and mean of trait by groups.** The graph on the left-hand side shows the dependence of phenotype values (G2) on PRS values. The graph on the right-hand side shows data stratified into 30 groups according to the PRS percentile. The Y-axis shows the average value of the trait for the group, the X-axis shows the group number.
