# Supplementary material for: Mapping of the gene network that regulates glycan clock of ageing
Source: publisher site journal article supplement (doi:10.18632/aging.205106), 2023-12-26
Supplement: Supplementary file [file aging-v15i24-205106-supplementary-material-SD9.pdf]

## APPENDIX TABLES

**Appendix Table 1. Pearson’s correlation coefficients for UPLC and LC-MS derived glycan traits after applying different normalization types and weighting of the subclass-specific values in LC-MS measurements.**

| UPLC | Total area | Largest peak | Median quotient | Total area                             | Total area                                | Total area                                    | Total area              | Total area                                 | Total area                                                   | Total area                                            |
|------|------------|--------------|-----------------|----------------------------------------|-------------------------------------------|-----------------------------------------------|-------------------------|--------------------------------------------|--------------------------------------------------------------|-------------------------------------------------------|
| LCMS | Total area | Largest peak | Median quotient | Total area with trait subclass average | Total area with weighted subclass average | Total area per subclass with weighted average | Total area per subclass | Total area per subclass with trait average | Total area with subclass concentration applied to raw values | Total area with response factor applied to raw values |
| G0   | 0.96       | 0.96         | 0.96            | 0.95                                   | 0.97                                      | 0.97                                          | 0.95                    | 0.95                                       | 0.96                                                         | 0.95                                                  |
| G1   | 0.78       | 0.77         | 0.78            | 0.75                                   | 0.80                                      | 0.79                                          | 0.75                    | 0.75                                       | 0.79                                                         | 0.73                                                  |
| G2   | 0.91       | 0.91         | 0.91            | 0.91                                   | 0.91                                      | 0.91                                          | 0.90                    | 0.90                                       | 0.91                                                         | 0.90                                                  |

Combination of normalization types as applied in UPLC- and LC- MS-derived data is shown on the top.
