# Supplementary material for: Mapping of the gene network that regulates glycan clock of ageing
Source: publisher site journal article supplement (doi:10.18632/aging.205106), 2023-12-26
Supplement: Supplementary file [file aging-v15i24-205106-supplementary-material-SD11.pdf]

**Appendix Table 3. List of genes mapped by positional, eQTL and chromatin interaction mapping in FUMA.**

| Mapping strategy                     | Mapped genes                                                                                                                                                                                                                                                                                                                                                                                                                                      |
|--------------------------------------|---------------------------------------------------------------------------------------------------------------------------------------------------------------------------------------------------------------------------------------------------------------------------------------------------------------------------------------------------------------------------------------------------------------------------------------------------|
| <b>Positional mapping</b>            | <i>GRHL3,STPG1,NIPAL3,RCAN3,SRRM1,RUNX3,ASXL2,KIF3C,NFKB1,MANBA,MB21D1,MTO1,EEF1A1,HIVEP2,GBX1,ABCF2,CHPF2,SMARCD3,KB1980E6.3,APTX,DNAJA1,SMU1,B4GALT1,SPINK4,BAG1,CHMP5,NFX1,AQP7,AP5B1,OVOL1,TNFRSF13B,CRHR1,SPPL2C,MAPT,STH,KANSL1,ARL17B,LRRC37A,NSF,WNT3,KPNB1,TBKBP1,TBX21,BZRAP1,SUPT4H1,AZ11,ENTHD2,C17orf89,SLC38A10,RUNX1</i>                                                                                                           |
| <b>eQTL mapping</b>                  | <i>MANBA,EEF1A1,NSF,MTO1,OOEP,DNAJA1,RAD51C,TMEM176A,TBKBP1,SUPT4H1,GPS1,CISD2,APTX,LRRC37A,WNT3,B4GALT1,LRRC37A2,C17orf89,KB-1980E6.3,SMU1,OVOL1,KANSL1,ARHGAP27,ARL17A,ARL17B</i>                                                                                                                                                                                                                                                               |
| <b>Chromatin interaction mapping</b> | <i>CNR2,PNRC2,SRSF10,MYOM3,IL22RA1,IFNL1,GRHL3,STPG1,NIPAL3,RCAN3,SRRM1,SYF2,DAPPI,DNAJB14,H2AFZ,SLC39A8,NFKB1,UBE2D3,CISD2,SLC9B1,SLC9B2,BDH2,CENPE,EEF1A1,SLC17A5,FILIP1,HIVEP2,AIG1,ADAT2,AL031320.1,PEX3,FUCA2,PLAGL1,RRM2B,UBR5,ODF1,ACO1,NDUFB6,GVQW1,APTX,DNAJA1,SMU1,B4GALT1,SPINK4,NFX1,AQP3,NOL6,RNASEH2C,ZNF287,MPRIIP,PLD6,RP1145M22.4,FLCN,STH,KANSL1,LRRC37A,RPRML,KPNB1,TBKBP1,TBX21,VEZF1,MKS1,LPO,MPO,RNF43,HSF5,MTMR4,RCAN1</i> |

**Appendix Table 4. Results of genome-wide gene-based association test by MAGMA (FDR<0.05).**

| Trait | Gene        | Chr | Start     | End       | N SNPs | Z     | P        | P adjusted |
|-------|-------------|-----|-----------|-----------|--------|-------|----------|------------|
| g0    | RUNX3       | 1   | 25226002  | 25291612  | 113    | 4.207 | 1.29E-05 | 9.68E-03   |
| g2    | RUNX3       | 1   | 25226002  | 25291612  | 113    | 4.109 | 1.99E-05 | 1.33E-02   |
| g0    | NFKB1       | 4   | 103422486 | 103538459 | 276    | 6.163 | 3.57E-10 | 1.33E-06   |
| g0    | MANBA       | 4   | 103552660 | 103682151 | 235    | 4.202 | 1.33E-05 | 9.77E-03   |
| g2    | NFKB1       | 4   | 103422486 | 103538459 | 276    | 6.506 | 3.86E-11 | 2.70E-07   |
| g2    | MANBA       | 4   | 103552660 | 103682151 | 235    | 4.749 | 1.02E-06 | 1.24E-03   |
| g0    | EEF1A1      | 6   | 74225473  | 74233520  | 19     | 4.370 | 6.21E-06 | 5.61E-03   |
| g0    | HIVEP2      | 6   | 143072604 | 143266338 | 486    | 4.459 | 4.11E-06 | 4.05E-03   |
| g1    | HIVEP2      | 6   | 143072604 | 143266338 | 485    | 7.134 | 4.86E-13 | 9.07E-09   |
| g2    | MTO1        | 6   | 74171301  | 74218959  | 118    | 4.824 | 7.05E-07 | 9.39E-04   |
| g2    | EEF1A1      | 6   | 74225473  | 74233520  | 19     | 5.809 | 3.14E-09 | 8.37E-06   |
| g2    | HIVEP2      | 6   | 143072604 | 143266338 | 486    | 6.109 | 5.00E-10 | 1.65E-06   |
| g0    | ABCF2       | 7   | 150904923 | 150924316 | 70     | 5.770 | 3.97E-09 | 1.01E-05   |
| g0    | CHPF2       | 7   | 150929575 | 150935908 | 16     | 4.928 | 4.16E-07 | 6.30E-04   |
| g0    | SMARCD3     | 7   | 150935850 | 150974982 | 113    | 6.517 | 3.58E-11 | 2.70E-07   |
| g2    | ABCF2       | 7   | 150904923 | 150924316 | 70     | 4.621 | 1.91E-06 | 2.14E-03   |
| g2    | CHPF2       | 7   | 150929575 | 150935908 | 16     | 3.890 | 5.02E-05 | 2.84E-02   |
| g2    | SMARCD3     | 7   | 150935850 | 150974982 | 113    | 5.292 | 6.06E-08 | 1.13E-04   |
| g0    | KB-1980E6.3 | 8   | 103540968 | 103550896 | 60     | 6.235 | 2.25E-10 | 9.55E-07   |
| g2    | KB-1980E6.3 | 8   | 103540968 | 103550896 | 60     | 5.039 | 2.34E-07 | 3.86E-04   |
| g0    | DNAJA1      | 9   | 33025209  | 33039905  | 55     | 3.791 | 7.49E-05 | 3.99E-02   |
| g0    | SMU1        | 9   | 33041762  | 33076665  | 103    | 4.738 | 1.08E-06 | 1.28E-03   |
| g0    | B4GALT1     | 9   | 33104080  | 33167354  | 238    | 6.800 | 5.22E-12 | 4.87E-08   |
| g0    | SPINK4      | 9   | 33218363  | 33248565  | 103    | 5.628 | 9.11E-09 | 2.22E-05   |
| g0    | BAG1        | 9   | 33247818  | 33264761  | 22     | 4.264 | 1.01E-05 | 7.94E-03   |
| g0    | CHMP5       | 9   | 33264940  | 33281977  | 21     | 5.408 | 3.20E-08 | 6.39E-05   |
| g0    | NFX1        | 9   | 33290509  | 33371155  | 115    | 6.090 | 5.64E-10 | 1.76E-06   |
| g1    | B4GALT1     | 9   | 33104080  | 33167354  | 239    | 7.576 | 1.79E-14 | 5.00E-10   |
| g2    | DNAJA1      | 9   | 33025209  | 33039905  | 55     | 4.353 | 6.72E-06 | 5.85E-03   |
| g2    | SMU1        | 9   | 33041762  | 33076665  | 103    | 5.461 | 2.37E-08 | 4.91E-05   |
| g2    | B4GALT1     | 9   | 33104080  | 33167354  | 239    | 6.109 | 5.00E-10 | 1.65E-06   |
| g2    | SPINK4      | 9   | 33218363  | 33248565  | 103    | 6.352 | 1.06E-10 | 4.95E-07   |
| g2    | BAG1        | 9   | 33247818  | 33264761  | 22     | 4.350 | 6.79E-06 | 5.85E-03   |
| g2    | CHMP5       | 9   | 33264940  | 33281977  | 21     | 5.902 | 1.79E-09 | 5.01E-06   |
| g2    | NFX1        | 9   | 33290509  | 33371155  | 115    | 7.088 | 6.80E-13 | 9.52E-09   |
| g1    | OVOL1       | 11  | 65554493  | 65564690  | 25     | 4.144 | 1.71E-05 | 1.20E-02   |
| g0    | ARHGAP27    | 17  | 43471275  | 43511787  | 103    | 3.784 | 7.73E-05 | 4.08E-02   |
| g0    | PLEKHM1     | 17  | 43513266  | 43568115  | 97     | 3.762 | 8.44E-05 | 4.42E-02   |
| g0    | CRHR1       | 17  | 43699267  | 43913194  | 957    | 4.787 | 8.47E-07 | 1.09E-03   |
| g0    | SPPL2C      | 17  | 43922256  | 43924438  | 18     | 4.712 | 1.23E-06 | 1.43E-03   |
| g0    | MAPT        | 17  | 43971748  | 44105700  | 682    | 4.878 | 5.37E-07 | 7.70E-04   |
| g0    | STH         | 17  | 44076616  | 44077060  | 1      | 4.884 | 5.20E-07 | 7.66E-04   |
| g0    | KANSL1      | 17  | 44107282  | 44302733  | 743    | 4.979 | 3.20E-07 | 5.11E-04   |
| g0    | ARL17B      | 17  | 44352150  | 44439130  | 14     | 4.583 | 2.30E-06 | 2.43E-03   |
| g0    | NSF         | 17  | 44668035  | 44834830  | 67     | 4.967 | 3.40E-07 | 5.29E-04   |
| g0    | WNT3        | 17  | 44839872  | 44910520  | 112    | 5.383 | 3.67E-08 | 7.09E-05   |
| g0    | TBX21       | 17  | 45810610  | 45823485  | 38     | 4.367 | 6.31E-06 | 5.61E-03   |
| g0    | AZI1        | 17  | 79163393  | 79196799  | 130    | 5.152 | 1.29E-07 | 2.33E-04   |

|    |           |    |          |          |      |       |          |          |
|----|-----------|----|----------|----------|------|-------|----------|----------|
| g0 | ENTHD2    | 17 | 79202077 | 79212891 | 30   | 6.226 | 2.39E-10 | 9.55E-07 |
| g0 | C17orf89  | 17 | 79213039 | 79215081 | 6    | 5.998 | 9.98E-10 | 2.94E-06 |
| g0 | SLC38A10  | 17 | 79218800 | 79269347 | 185  | 5.490 | 2.01E-08 | 4.33E-05 |
| g1 | TNFRSF13B | 17 | 16832849 | 16875432 | 180  | 6.406 | 7.49E-11 | 4.20E-07 |
| g2 | CRHR1     | 17 | 43699267 | 43913194 | 957  | 4.294 | 8.78E-06 | 7.23E-03 |
| g2 | SPPL2C    | 17 | 43922256 | 43924438 | 18   | 4.207 | 1.30E-05 | 9.68E-03 |
| g2 | MAPT      | 17 | 43971748 | 44105700 | 682  | 4.394 | 5.57E-06 | 5.20E-03 |
| g2 | STH       | 17 | 44076616 | 44077060 | 1    | 4.424 | 4.85E-06 | 4.61E-03 |
| g2 | KANSL1    | 17 | 44107282 | 44302733 | 743  | 4.515 | 3.16E-06 | 3.28E-03 |
| g2 | ARL17B    | 17 | 44352150 | 44439130 | 14   | 4.182 | 1.44E-05 | 1.05E-02 |
| g2 | NSF       | 17 | 44668035 | 44834830 | 67   | 4.608 | 2.03E-06 | 2.23E-03 |
| g2 | WNT3      | 17 | 44839872 | 44910520 | 112  | 5.056 | 2.14E-07 | 3.62E-04 |
| g2 | ITGB3     | 17 | 45331212 | 45421658 | 287  | 3.940 | 4.08E-05 | 2.38E-02 |
| g2 | ITGB3     | 17 | 45331263 | 45421658 | 287  | 3.940 | 4.08E-05 | 2.38E-02 |
| g2 | TBX21     | 17 | 45810610 | 45823485 | 38   | 4.771 | 9.15E-07 | 1.14E-03 |
| g2 | BZRAP1    | 17 | 56378592 | 56406152 | 82   | 4.075 | 2.30E-05 | 1.47E-02 |
| g2 | SUPT4H1   | 17 | 56422539 | 56430454 | 22   | 4.088 | 2.18E-05 | 1.42E-02 |
| g2 | AZI1      | 17 | 79163393 | 79196799 | 130  | 6.462 | 5.18E-11 | 3.22E-07 |
| g2 | ENTHD2    | 17 | 79202077 | 79212891 | 30   | 7.584 | 1.68E-14 | 5.00E-10 |
| g2 | C17orf89  | 17 | 79213039 | 79215081 | 6    | 6.366 | 9.68E-11 | 4.93E-07 |
| g2 | SLC38A10  | 17 | 79218800 | 79269347 | 185  | 7.012 | 1.18E-12 | 1.32E-08 |
| g0 | RUNX1     | 21 | 36160098 | 37376965 | 3508 | 4.784 | 8.60E-07 | 1.09E-03 |
| g2 | RUNX1     | 21 | 36160098 | 37376965 | 3506 | 4.440 | 4.51E-06 | 4.35E-03 |

Trait- galactosylation trait which was tested; Gene- symbol of the gene; Chr- chromosome on which gene is found; Start- starting position for the gene sequence in GRCh37(hg19) build; End- end position for the gene sequence; N SNPs- number of SNPs in the gene; Z- Z-score of the association; P- unadjusted P value of the association; P adjusted- adjusted p value using Benjamini and Hochberg method.

**Appendix Table 5. Results of implementation of SBayesR and C+T models for G0, G1 and G2.**

| PRS model | Parameters  | G0     |            |             | G1     |            |             | G2     |            |             |
|-----------|-------------|--------|------------|-------------|--------|------------|-------------|--------|------------|-------------|
|           |             | R2     | R spearman | PRS p-value | R2     | R spearman | PRS p-value | R2     | R spearman | PRS p-value |
| SbayesR   | PRS+sex+age | 0.3345 | 0.5861     | 4.68E-04    | 0.0159 | 0.1424     | 0.4978      | 0.3407 | 0.5776     | 1.76E-04    |
|           | PRS+age     | 0.3108 | 0.5796     | 2.70E-04    | 0.0056 | 0.1240     | 0.4347      | 0.3232 | 0.5745     | 1.29E-04    |
|           | PRS+sex     | 0.1076 | 0.2977     | 8.55E-04    | 0.0146 | 0.1063     | 0.5009      | 0.1008 | 0.2934     | 6.55E-04    |
|           | PRS         | 0.0736 | 0.2528     | 4.79E-04    | 0.0038 | 0.0574     | 0.4367      | 0.0737 | 0.2801     | 4.77E-04    |
| C+T       | PRS+sex+age | 0.3372 | 0.6198     | 3.31E-04    | 0.0363 | 0.2043     | 0.0524      | 0.3423 | 0.5843     | 1.45E-04    |
|           | PRS+age     | 0.3020 | 0.6086     | 7.86E-04    | 0.0245 | 0.1817     | 0.0559      | 0.3191 | 0.5784     | 2.16E-04    |
|           | PRS+sex     | 0.0935 | 0.2892     | 3.29E-03    | 0.0346 | 0.1756     | 0.0543      | 0.0946 | 0.2835     | 1.18E-03    |
|           | PRS         | 0.0450 | 0.1999     | 6.74E-03    | 0.0222 | 0.1200     | 0.0586      | 0.0600 | 0.2217     | 1.67E-03    |
| Models    | age+sex     | 0.2807 | 0.5379     |             | 0.0130 | 0.1276     |             | 0.2791 | 0.5199     |             |
|           | age         | 0.2506 | 0.5346     |             | 0.0018 | 0.1037     |             | 0.2577 | 0.5202     |             |
|           | sex         | 0.0428 | 0.1702     |             | 0.0118 | 0.1026     |             | 0.0324 | 0.1512     |             |

PRS Model - method that was used to build model; Parameters - sets of parameters for a linear regression model with the trait as the outcome; R2 - part of trait variance that a model explains; R Spearman - the Spearman correlation coefficient between observed and predicted values of the trait; PRS p-value - the two-tailed p-value for the t-stats of PRS param.

**Appendix Table 6. Meta-analysis results of testing differences in G0, G1 and G2 traits in treated (upregulation) and control cell line.**

| Experiment    | Glycan trait | Estimate  | SE       | p-value  | CI lower  | CI upper  |
|---------------|--------------|-----------|----------|----------|-----------|-----------|
| VPR_EEF1A1    | GP_G0        | 2.484280  | 0.966877 | 0.010188 | 0.589236  | 4.379323  |
|               | GP_G1        | -2.246458 | 0.487330 | 0.000004 | -3.201608 | -1.291309 |
|               | GP_G2        | -0.257913 | 0.352768 | 0.464710 | -0.949325 | 0.433499  |
| VPR_HIVEP2    | GP_G0        | -1.408927 | 0.518379 | 0.006569 | -2.424931 | -0.392924 |
|               | GP_G1        | 0.117828  | 0.443605 | 0.790535 | -0.751621 | 0.987278  |
|               | GP_G2        | 1.079269  | 0.379913 | 0.004500 | 0.334654  | 1.823884  |
| VPR_MANBA     | GP_G0        | 2.106936  | 1.137043 | 0.063883 | -0.121627 | 4.335500  |
|               | GP_G1        | -2.521960 | 0.755039 | 0.000837 | -4.001809 | -1.042112 |
|               | GP_G2        | -0.176833 | 0.265544 | 0.505459 | -0.972904 | 0.343625  |
| VPR_NFKB1     | GP_G0        | 0.823330  | 1.339071 | 0.538653 | -1.801201 | 3.447862  |
|               | GP_G1        | -0.886318 | 1.267960 | 0.484545 | -3.371473 | 1.598837  |
|               | GP_G2        | 0.022321  | 0.755465 | 0.976429 | -1.458363 | 1.503006  |
| VPR_TNFRSF13B | GP_G0        | 2.384531  | 0.622566 | 0.000128 | 1.164323  | 3.604739  |
|               | GP_G1        | -1.515340 | 0.902826 | 0.093261 | -3.284846 | 0.254166  |
|               | GP_G2        | -0.706994 | 0.360817 | 0.050063 | -1.414181 | 0.000194  |

Trait values were transformed to obtain normal distribution using Box-Cox method and analyzed using Student's t test. Estimate- effect size estimates; SE- standard error of estimate; p-value- p value of the meta-analysis; CI-confidence interval.

**Appendix Table 7. Overview of platforms used for quantification of IgG N-glycans and sample demographics.**

| Cohort          | Platform for glycan analysis | Reference                | N total available (glycans) | N female | N male | median age (min-max) | N in GWAS |
|-----------------|------------------------------|--------------------------|-----------------------------|----------|--------|----------------------|-----------|
| TwinsUK         | UPLC                         | Menni et al.             | 4624                        | 4282     | 342    | 54                   | 4477      |
| CROATIA-Korcula | UPLC and LC-MS               | Pučić et al.             | 2478                        | 1148     | 1330   | 57                   | 2436      |
| CROATIA-Split   | LC-MS                        | Not published            | 973                         | 383      | 590    | 52                   | 920       |
| CROATIA-Vis     | LC-MS                        | Pučić et al.             | 683                         | 394      | 289    | 57                   | 675       |
| VIKING          | UPLC                         | Landini et al.           | 1086                        | 645      | 441    | 51                   | 1071      |
| ORCADES         | UPLC                         | Krištić et al.           | 1786                        | 1082     | 704    | 54                   | 1720      |
| LLS             | LC-MS                        | Ruhaak et al.            | 1841                        | 974      | 867    | 59                   | 1190      |
| KORA F4         | LC-MS                        | Wahl et al.              | 1823                        | 935      | 888    | 62                   | 1167      |
| EGCUT           | UPLC                         | Trbojević-Akmačić et al. | 1108                        | 516      | 592    | 69                   | 483       |
| GCKD            | UPLC                         | Not published            | 4933                        | 1965     | 2968   | 63                   | 4933      |
| EPIC            | UPLC                         | Not published            | 3600                        | 61.20%   | 38.80% | 50                   | 2406      |

Cohort- name of the study; Platform- platform used for quantification of IgG N-glycans; Reference- published study in which the IgG N-glycome analysis for the cohort was described; N total (glycans)- number of subjects in the cohort with measured glycans; N female- number of female subjects; N male- number of male subjects; median age- median age of participants in the cohort; N in GWAS- number of participants in GWAS.

**Appendix Table 8. Overview of genotyping arrays and imputation.**

| Cohort                | Genotyping platform(s)                                                                        | ID call rate | SNP call rate                                     | HWE p | MAF                                                   | Imputation tool                          |
|-----------------------|-----------------------------------------------------------------------------------------------|--------------|---------------------------------------------------|-------|-------------------------------------------------------|------------------------------------------|
| TwinsUK               | Illumina HumanHap300; Illumina HumanHap610Q                                                   | >95%         | > 97% (MAF $\geq$ 5%); > 99% (1% $\leq$ MAF < 5%) | >1e-6 | $\geq$ 1%                                             | MACH (Michigan Imputation Server v1.0.2) |
|                       | Human660W-Quad_v1_A                                                                           | >97%<br>>99% | >95%                                              | >1e-3 |                                                       | Eagle2/minimac 3                         |
| EPIC                  | HumanCoreExome-12v1-0_B<br>Illumina<br>InfiniumOmniExpressExome-8v1-3_A DNA Analysis BeadChip |              |                                                   |       | zCall<br>threshold=7                                  | Eagle2/minimac 3                         |
| LLS                   | Illumina660 W; Illumina<br>OmniExpress                                                        | >95%         | >95%                                              | >1e-4 | $\geq$ 1%                                             | IMPUTE2                                  |
| CROATIA-Korcula 1,2,3 | Illumina HumanHap s370CNV DUO/QUAD Phase 1(1); Illumina HumanOmniExpress Exome (2 and 3)      | >97%         | >98%                                              | >1e-6 | $\geq$ 1%                                             | SHAPEIT2/Sanger                          |
| CROATIA-Split         | Illumina HumanHap 370CNV QUAD Phase I; Illumina HumanOmniExpress Exome                        | $\geq$ 97%   | >98%                                              | >1e-6 | $\geq$ 1%                                             | SHAPEIT2/Sanger                          |
| CROATIA-Vis           | Illumina HumanHap300v1 BeadChip                                                               | >97%         | >98%                                              | >1e-6 | $\geq$ 1%                                             | SHAPEIT2/Sanger                          |
| VIKING                | Illumina HumanOmniExpress Exome                                                               | >97%         | >98%                                              | >1e-6 | $\geq$ 1% omni markers;<br>$\geq$ 0.01% exome markers | SHAPEIT2/Sanger                          |
| EGCUT                 | Illumina GSAv1.0, GSAv2.0, GSAv2.0_EST                                                        | >95%         | >95%                                              | >1e-4 | $\geq$ 1%                                             | Beagle v.28Sep18.793                     |
| KORA F4               | Affymetrix Axiom                                                                              | >97%         | >98%                                              | >5e-6 | $\geq$ 1%                                             | SHAPEIT/IMPUTE                           |
| ORCADES               | HumanHap300v2 Phase 1                                                                         | >97%         | >98%                                              | >1e-6 | $\geq$ 1%                                             | SHAPEIT2/Sanger                          |
| GCKD                  | Illumina Omni2.5Exome BeadChip                                                                | >97%         | >96%                                              | >1e-5 | >1%                                                   | Eagle/minimac3                           |

Cohort- name of the participating study; Genotyping platform- SNP array used for genotyping in the given cohort; ID call rate- ID call rate; SNP call rate- SNP call rate; HWE p- p value of HWE test used for filtering; MAF- minor allele frequency threshold used for filtering; Imputation tool- software used for imputation of genetic data.

**Appendix Table 9. Glycan names and description of the most abundant glycan structure in each peak as measured by ultra-performance liquid chromatography; glycan name- name of the glycan; description- structure of the glycan (F- core fucosylated, A1- monoantennary, A2- diantennary, B- bisecting GlcNAc, G1- monogalactosylated, G2- digalactosylated, S1- monosialylated, S2- disialylated, M5- pentamannose, [3] or [6]- position of the attached galactose).**

|                                      | <b>Glycan name</b> | <b>Description</b>       |
|--------------------------------------|--------------------|--------------------------|
|                                      | GP1                | FA1 glycan               |
|                                      | GP2                | A2 glycan                |
|                                      | GP3                | Structure not determined |
|                                      | GP4                | FA2 glycan               |
|                                      | GP5                | M5 glycan                |
|                                      | GP6                | FA2B glycan              |
|                                      | GP7                | A2G1 glycan              |
|                                      | GP8                | FA2[6]G1 glycan          |
|                                      | GP9                | FA2[3]G1 glycan          |
|                                      | GP10               | FA2[6]BG1 glycan         |
|                                      | GP11               | FA2[3]BG1 glycan         |
| UPLC<br>measured<br>glycan<br>traits | GP12               | A2G2 glycan              |
|                                      | GP13               | A2BG2 glycan             |
|                                      | GP14               | FA2G2 glycan             |
|                                      | GP15               | FA2BG2 glycan            |
|                                      | GP16               | FA2G1S1 glycan           |
|                                      | GP17               | A2G2S1 glycan            |
|                                      | GP18               | FA2G2S1 glycan           |
|                                      | GP19               | FA2BG2S1 glycan          |
|                                      | GP20               | Structure not determined |
|                                      | GP21               | A2G2S2 glycan            |
|                                      | GP22               | A2BG2S2 glycan           |
|                                      | GP23               | FA2G2S2 glycan           |
|                                      | GP24               | FA2BG2S2 glycan          |

**Appendix Table 10. Glycan names and description of glycan structure in each peak as measured by liquid chromatography coupled with mass spectrometry; glycan name- name of the glycan in LC-MS data; description- structure of the glycan (F- core fucosylated, N- bisecting GlcNAc, G1- monogalactosylated, G2- digalactosylated, S1- monosialylated).**

| <b>Glycan class</b>   | <b>Glycan name</b> | <b>Description</b> |
|-----------------------|--------------------|--------------------|
| Total IgG1<br>glycans | LC_IGP1            | IgG1_G0            |
|                       | LC_IGP2            | IgG1_G0F           |
|                       | LC_IGP3            | IgG1_G0FN          |
|                       | LC_IGP4            | IgG1_G0N           |
|                       | LC_IGP5            | IgG1_G1            |
|                       | LC_IGP6            | IgG1_G1F           |
|                       | LC_IGP7            | IgG1_G1FN          |
|                       | LC_IGP8            | IgG1_G1FNS1        |
|                       | LC_IGP9            | IgG1_G1FS1         |
|                       | LC_IGP10           | IgG1_G1N           |
|                       | LC_IGP11           | IgG1_G1NS1         |
|                       | LC_IGP12           | IgG1_G1S1          |
|                       | LC_IGP13           | IgG1_G2            |
|                       | LC_IGP14           | IgG1_G2F           |
|                       | LC_IGP15           | IgG1_G2FN          |
|                       | LC_IGP16           | IgG1_G2FNS1        |
|                       | LC_IGP17           | IgG1_G2FS1         |
|                       | LC_IGP18           | IgG1_G2N           |
|                       | LC_IGP19           | IgG1_G2NS1         |
|                       | LC_IGP20           | IgG1_G2S1          |
| Total IgG2<br>glycans | LC_IGP87           | IgG2_G0            |
|                       | LC_IGP88           | IgG2_G0F           |
|                       | LC_IGP89           | IgG2_G0FN          |
|                       | LC_IGP90           | IgG2_G0N           |
|                       | LC_IGP91           | IgG2_G1            |
|                       | LC_IGP92           | IgG2_G1F           |
|                       | LC_IGP93           | IgG2_G1FN          |
|                       | LC_IGP94           | IgG2_G1FNS1        |
|                       | LC_IGP95           | IgG2_G1FS1         |
|                       | LC_IGP96           | IgG2_G1N           |
|                       | LC_IGP97           | IgG2_G1NS1         |
|                       | LC_IGP98           | IgG2_G1S1          |
|                       | LC_IGP99           | IgG2_G2            |
|                       | LC_IGP100          | IgG2_G2F           |
|                       | LC_IGP101          | IgG2_G2FN          |
|                       | LC_IGP102          | IgG2_G2FNS1        |
| LC_IGP103             | IgG2_G2FS1         |                    |
| LC_IGP104             | IgG2_G2N           |                    |
| LC_IGP105             | IgG2_G2NS1         |                    |
| LC_IGP106             | IgG2_G2S           |                    |

|                    |           |             |
|--------------------|-----------|-------------|
|                    | LC_IGP173 | IgG4_G0F    |
|                    | LC_IGP174 | IgG4_G0FN   |
|                    | LC_IGP175 | IgG4_G1F    |
|                    | LC_IGP176 | IgG4_G1FN   |
| Total IgG4 glycans | LC_IGP177 | IgG4_G1FNS1 |
|                    | LC_IGP178 | IgG4_G1FS1  |
|                    | LC_IGP179 | IgG4_G2F    |
|                    | LC_IGP180 | IgG4_G2FN   |
|                    | LC_IGP181 | IgG4_G2FNS1 |
|                    | LC_IGP182 | IgG4_G2FS1  |

**Appendix Table 11. Formulas used for calculation of G0, G1 and G2 traits from LC-MS and UPLC measured glycan data.**

| IgG N-glycan trait | Description                                                        | LCMS formula                                                                                                       | UPLC formula                                                                 |
|--------------------|--------------------------------------------------------------------|--------------------------------------------------------------------------------------------------------------------|------------------------------------------------------------------------------|
| G0                 | Percentage of agalactosylated structures in total IgG N-glycome    | $(LC\_IGP1+LC\_IGP2+LC\_IGP3+LC\_IGP4+LC\_IGP87+LC\_IGP88+LC\_IGP89+LC\_IGP90+LC\_IGP173+LC\_IGP174)/SUM(ALL)*100$ | $SUM(GP1+GP2+GP4+GP5+GP6)/SUM(GP1:GP24)*100$                                 |
| G1                 | Percentage of monogalactosylated structures in total IgG N-glycome | $(SUM(LC\_IGP5:LC\_IGP12)+SUM(LC\_IGP91:LC\_IGP98)+SUM(LC\_IGP175:LC\_IGP178))/SUM(ALL)*100$                       | $(GP7+GP8+GP9+GP10+GP11+GP16)/SUM(GP1:GP24)*100$                             |
| G2                 | Percentage of digalactosylated structures in total IgG N-glycome   | $(SUM(LC\_IGP13:LC\_IGP20)+SUM(LC\_IGP99:LC\_IGP106)+SUM(LC\_IGP179:LC\_IGP182))/SUM(ALL)*100$                     | $(GP12+GP13+GP14+GP15+GP17+GP18+GP19+GP21+GP22+GP23+GP24)/SUM(GP1:GP24)*100$ |

**Appendix Table 12. Parameters for SBayesR model for PRS calculation.**

|                    |                     |
|--------------------|---------------------|
| --pi               | 0.95,0.02,0.02,0.01 |
| --gamma            | 0.0,0.01,0.1,1      |
| --hsq              | 0.5                 |
| --chain-length     | 3000                |
| --burn-in          | 1000                |
| --unscale-genotype | yes                 |
| --exclude-mhc      | yes                 |
| --robust           | yes                 |
| --p-value          | 0.9                 |



**Appendix Table 13. gRNA sequences for targeted upregulation/downregulation.**

| sgRNA molecule | Target site sequence (5'→3') | Experiment            |
|----------------|------------------------------|-----------------------|
| KIF3C_A-g1     | GTGTCCGAGGATGGTGGCTCG        | CRISPRa (dSaCas9)     |
| KIF3C_A-g2     | GTTCCCGGCATGCTCGGGCTCG       |                       |
| KIF3C_A-g3     | GTTGTAGTCCTGCCTTTGTAA        |                       |
| NFKB1_A-g1     | GTATGCTCTCTCGACGTCAGT        |                       |
| NFKB1_A-g2     | GTCGAGAGAGCATAACAGACAG       |                       |
| NFKB1_A-g3     | GGGCGGGAGGTAGGGTGCCTG        |                       |
| MANBA_A-g1     | GACCCGCGACGCCCGCTTTCA        |                       |
| MANBA_A-g2     | GAGCGCTCAGCTGACCTAGGG        |                       |
| MANBA_A-g3     | GTCAGTACATACAACTGGAGGC       |                       |
| SLC38A10_A-g1  | GGTTTGGTGGGACGCGAGCCA        |                       |
| SLC38A10_A-g2  | GTCCAAACCGAGGCCTCGCGGG       |                       |
| SLC38A10_A-g3  | GCCAGCTCGTTGAACTGGGGCC       |                       |
| TNFRSF13B_A-g1 | GTGTGTACCCCATGGGACGCC        |                       |
| TNFRSF13B_A-g2 | GTTAGTGCTTGGGCTGCACTTC       |                       |
| TNFRSF13B_A-g3 | GCTTGCATGAGGTATTGACTA        |                       |
| EEF1A1_A-g1    | GCCTCAGTGATGACGAGAGCGG       |                       |
| EEF1A1_A-g2    | GTGAGGCTCCGGTGCCCGTCA        |                       |
| EEF1A1_A-g3    | GTCGGCAATTGAACCGGTGCC        |                       |
| HIVEP2_A-g1    | GTCATCTGCATAGATCCGCGGC       |                       |
| HIVEP2_A-g2    | GGAGCTTGTTCACCTTTATAT        |                       |
| HIVEP2_A-g3    | GCTGCTTTGCGTAATGTCCTGG       |                       |
| KIF3C_G-g1     | GCCAGCTAAGCTCCCGACTG         |                       |
| KIF3C_G-g2     | GCGGCATGCTCGGGCTCGGTG        |                       |
| KIF3C_G-g3     | GCCTGTCATCCCGAGCGGT          |                       |
| NFKB1_G-g1     | GGAAGAGGAGGTTTCGCCAC         |                       |
| NFKB1_G-g2     | GGCGGCCCGACCGACGGGAA         |                       |
| NFKB1_G-g3     | GCGCCGCTTACTGGCCGGG          |                       |
| MANBA_G-g1     | GCTGTAAGTGAAGCTCCGCGG        |                       |
| MANBA_G-g2     | GTCGATCTCTCCACATCTCGG        |                       |
| MANBA_G-g3     | GCCTGATCCAGGTATGGCGTG        |                       |
| SLC38A10_G-g1  | GTCCCACCAAACCCTACCCCC        |                       |
| SLC38A10_G-g2  | GGTCACAGGTCCCAACGTCC         |                       |
| SLC38A10_G-g3  | GGTGTCCCTAGCTGGCTCTG         |                       |
| TNFRSF13B_G-g1 | GCTGGACCTTGCAACCCCA          |                       |
| TNFRSF13B_G-g2 | GCCCAGGCCACTCATTACTC         |                       |
| TNFRSF13B_G-g3 | GCGAGGTGGCCGGAGCCGTG         |                       |
| EEF1A1_G-g1    | GGTGCCACCAGATTGCACG          |                       |
| EEF1A1_G-g2    | GTTGCGAAAAAGAAGTTCA          |                       |
| EEF1A1_G-g3    | GAAGGGCCATAACCCGTAAAG        |                       |
| HIVEP2_G-g1    | GCTTTGCGTAATGTCCTGGG         |                       |
| HIVEP2_G-g2    | GGCCCGTTGTCAGGTAGCGG         |                       |
| HIVEP2_G-g3    | GCGACGTGCACCGGCGCGCA         |                       |
| NT-sgRNA       | GTAGGCGCGCCGCTCTCTAC         | Non-targeting control |

**Appendix Table 14. qPCR primer sequences for SYBR detection of gene expression.**

| <b>Primer name</b> | <b>Sequence (5'→3')</b> |
|--------------------|-------------------------|
| KIF3C_FW1          | CATGGAGAGGCTCATGCGAT    |
| KIF3C_REV1         | TGGTTGTCACTCATGGTCCG    |
| NFKB1_FW1          | GAAGCACGAATGACAGAGGC    |
| NFKB1_REV1         | GCTTGGCGGATTAGCTCTTTT   |
| MANBA_FW1          | TGAGCTGCGTTTCCAGTCAG    |
| MANBA_REV1         | ACATGGCATTACCCTTCTGC    |
| SLC38A10_FW1       | GGTCCCAACACAGGCTACTG    |
| SLC38A10_REV1      | GACACCAAACAGCATCCACC    |
| TNFRSF13B_FW1      | GCAAGGAGCAAGGCAAGTTC    |
| TNFRSF13B_REV1     | TCCTTGGTACCTTCCCGAGT    |
| EEF1A1_FW1         | TTGGACACGTAGATTCGGGC    |
| EEF1A1_REV1        | CGTTCACGCTCAGCTTTCAG    |
| HIVEP2_FW1         | GGGACACAGCTCTAGGACAAA   |
| HIVEP2_REV1        | TGCGGTGGATATTGCTTCTCT   |
