# Supplementary material for: Mapping of the gene network that regulates glycan clock of ageing
Source: Aging (Albany NY). 2023 Dec 26;15(24):14509–52. doi: 10.18632/aging.205106 (PMC10781487; doi:10.18632/aging.205106)
Supplement: Supplementary Table 1 [file aging-15-205106-s003.xls]

## Sheet: S1
Supplementary Table 1. Gene prioritization table with overview of evidence used to priotize a gene in a given locus.
Locus	Top SNP rsID	Top SNP position	Strongest associated trait	Gene	Positional mapping	ciMap (GM12878)	eQTL mapping (CEDAR and Fairfax)	Coloc eQTLgen (PP3)	Coloc eQTLgen (PP4)	VEP (chr:pos:A1:A2 (aa change); SIFT score; Polyphen score)	MAGMA	other
1:24699711-25493756	rs188468174	1:25291697	g0	RUNX3*	yes	no		1	0		0.00968082	previous _studies
				GRHL3	yes	yes
				STPG1	yes	yes		1	0
				NIPAL3	yes	yes		1	0
				RCAN3	yes	yes		1	0
				SRRM1	yes	yes		1	0
2:26109539-26149988	rs111919630	2:26139430	g0	ASXL2	yes	no		0.999698	0.000118818
				KIF3C*	yes	no		0.0998451	0.900145
4:103390496-103567348	rs3774964	4:103519487	g2	NFKB1*	yes	yes		0.137077	0.862		2.70453e-07
				MANBA	yes	no	CEDAR_B-cell_CD19; CEDAR_T-cell_CD4; CEDAR_T-cell_CD8; Fairfax_2012_B-cell_CD19; DICE_B_cell_naive	1	0	4:103557077:G:A(missense variant; SIFT=tolerated(0.17); Polyphen2=benign(0.011))	0.00124365
				CISD2	no		Fairfax_2012_B-cell_CD19	1	0
6:31107733-31164511	rs1265109	6:31119589	g0	HLA region								complex_LD_pattern
6:74168723-74285118	rs3822960	6:74230859	g2	MB21D1	yes	no		0.999	0
				OOEP	no	no	CEDAR_T-cell_CD4
				MTO1	yes	no	CEDAR_T-cell_CD4; CEDAR_T-cell_CD8	0.0402713	0.959		0.000939336
				EEF1A1*	yes	yes	CEDAR_B-cell_CD19; CEDAR_T-cell_CD4; CEDAR_T-cell_CD8; Fairfax_2012_B-cell_CD19	0.0354457	0.964		8.37469e-06
6:143088071-143206826	rs7758383	6:143169723	g2	HIVEP2*	yes	yes		0.998484	0.00103957		1.64685e-06	previous studies
7:150856165-150906453	rs113745074	7:150942349	g0	ABCF2	yes	no		1	0		1.00963e-05	previous studies
				CHPF2	yes	no		1	0		0.000630012	previous studies
				SMARCD3*	yes	no		1	0		2.70453e-07	previous studies
				TMEM176A			CEDAR_T-cell_CD8	1	0
				GBX1	yes	no
8:103542538-103550211	rs13250010	8:103545983	g0	KB-1980E6.3*	yes	no	Cells_EBV-transformed_lymphocytes				9.54641e-07
				UBR5	no	yes		1	0
				RRM2B	no	yes		1	0
				ODF1	no	yes						previous studies
9:32933492-33385427	rs13297246	9:33128617	g2	B4GALT1*	yes	yes	DICE_B_cell_naive; Cells_EBV-transformed_lymphocytes	1	0		1.64685e-06	previous studies
				DNAJA1	yes	yes	CEDAR_T-cell_CD4	0.890357	0.00133397		0.00585334
				APTX	yes	yes	Fairfax_2012_B-cell_CD19	1	0
				SMU1	yes	yes	Cells_EBV-transformed_lymphocytes	1	0		4.91038e-05
				SPINK4	yes	yes					4.95071e-07
				BAG1	yes	no		1	0		0.00585334
				CHMP5	yes	no					5.01333e-06
				NFX1	yes	yes		1	0		9.52441e-09
				AQP7	yes	no
11:65555524-65555524	rs10896045	11:65555524	g1	AP5B1	yes	no		0.95351	0.0439012			previous studies
				OVOL1*	yes	no	Cells_EBV-transformed_lymphocytes				0.0119524	previous studies
17:16813994-16875636	rs34562254	17:16842991	g1	TNFRSF13B*	yes	no		0.999	0	17:16842991:A:G (P/L)(SIFT=tolerated(0.23);PolyPhen=possibly_damaging(0.476))	4.19645e-07	previous studies
17:43856639-44863413	rs199516	17:44856485	g0	ARHGAP27	no	no	Cells_EBV-transformed_lymphocytes	0.999	0		0.0408464	previous studies
				PLEKHM1	no	no		0.994435	0.00533251		0.0441816
				CRHR1	yes	no				17:43902861:A:C (P/T) (SIFT=tolerated(0.17);PolyPhen=benign(0)); 17:43910507:T:C (A/V) (SIFT=deleterious_low_confidence(0)); 17:43912159:C:G (E/Q) (SIFT=deleterious_low_confidence(0); Polyphen=benign(0.003))	0.00109456	previous studies
				SPPL2C	yes	no				17:43923654:C:G (R/P) (SIFT=deleterious (0.01); PolyPhen=benign(0.442)); 17:43923266:A:G (A/T) (SIFT=tolerated(0.54); Polyphen=benign(0.036)); 17:43924130:G:A (G/R) (SIFT=tolerated_low_confidence (0.48); Polyphen=benign(0.003))	0.00143447	previous studies
				MAPT	yes	no		0.999	0	17:44061278:T:C (R/W) (SIFT=0;PolyPhen=0.903); 17:44055647:A:T(stop_codon_lost) */K; 17:44060775:C:T(P/L) (SIFT=tolerated (0.25); Polyphen=possibly_damaging (0.78)); 17:44061023:G:A (D/N) (SIFT=tolerated(0.05); Polyphen=benign(0.035))	0.000770306	previous studies
				STH	yes	yes					0.000765631
				KANSL1	yes	yes	Cells_EBV-transformed_lymphocytes	0.999	0		0.00051144
				ARL17B	yes	no	Cells_EBV-transformed_lymphocytes	0.999	0		0.00242672
				LRRC37A	yes	yes	Fairfax_2012_B-cell_CD19	0.999615	0.000193455
				LRRC37A2	no	no	DICE_B_cell_naive; Cells_EBV-transformed_lymphocytes	0.684215	0.315654
				ARL17A	no		Cells_EBV-transformed_lymphocytes	0.999403	0.000406163
				NSF	yes	no	CEDAR_B-cell_CD19; CEDAR_T-cell_CD4; CEDAR_T-cell_CD8; Fairfax_2012_B-cell_CD19; Cells_EBV-transformed_lymphocytes	0.999738	5.97e-05		0.000529383
				WNT3*	yes	no	Fairfax_2012_B-cell_CD19; DICE_B_cell_naive; Cells_EBV-transformed_lymphocytes	0.496628	0.50325		7.0864e-05
17:45766846-45870129	rs1808192	17:45794706	g2	KPNB1	yes	yes		0.999	0
				TBKBP1*	yes	yes	CEDAR_T-cell_CD8; Fairfax_2012_B-cell_CD19; DICE_B_cell_naive; Cells_EBV-transformed_lymphocytes	0.303044	0.696873
				TBX21	yes	yes					0.00113857
				ITGB3	no			0.999	0		0.0237684
17:56404349-56418136	rs2526377	17:56410041	g2	BZRAP1*	yes	no		1	0		0.0147199
				SUPT4H1	yes	no	CEDAR_T-cell_CD8; Fairfax_2012_B-cell_CD19	0.999038	0.00092107		0.0141897
				RAD51C	no		CEDAR_T-cell_CD4; CEDAR_T-cell_CD8;Fairfax_2012_B-cell_CD19; Cells_EBV-transformed_lymphocytes	0.985607	0.0143525
17:79158040-79268562	rs2659005	17:79218714	g2	AZI1	yes	no		0.940669	0.0593199		3.22202e-07	previous studies
				ENTHD2	yes	no		0.433057	0.566938		5.00437e-10	previous studies
				C17orf89	yes	no	Cells_EBV-transformed_lymphocytes; DICE_B_cell_naive	1	0		4.92799e-07
				SLC38A10*	yes	no		1	0	17:79220224:C:G (A/G) (SIFT=deleterious(0.04);PolyPhen=possibly_damaging(0.693))	1.31942e-08	previous studies
				GPS1	no	no	CEDAR_T-cell_CD8	1	0
21:36564553-36665202	rs4817708	21:36567726	g0	RUNX1*	yes	no		0.999	0		0.00109456	previous studies
Top SNP rsID- rsID identified for the top SNP in the locus; Locus- chromosome: start-end position in GRCh37 (hg19) build; Strongest associated trait- galactosylation trait with strongest association with the locus; Gene- gene found in the locus; Positional mapping- if the gene was mapped in the locus based on positional mapping with * denoting the nearest gene to top SNP; ciMap- if the gene was m…
