# Supplementary material for: Mapping of the gene network that regulates glycan clock of ageing
Source: Aging (Albany NY). 2023 Dec 26;15(24):14509–52. doi: 10.18632/aging.205106 (PMC10781487; doi:10.18632/aging.205106)
Supplement: Supplementary Table 2 [file aging-15-205106-s004.xls]

## Sheet: S2
Supplementary Table 2. Results of the colocalization analysis for IgG galactosylation signals and eQTL signals for gene in the discovered genomic loci.
Gene	Trait	Locus	N SNPs	PP.H3	PP.H4
hsa-mir-142	g2	17:56410041:A:G	4633	0.00123695	0.998763
EEF1A1	g2	6:74230859:C:T	6571	0.0354457	0.964551
MTO1	g2	6:74230859:C:T	6818	0.0402713	0.959725
KIF3C	g1	2:26139430:C:T	4794	0.0998451	0.900145
NFKB1	g0	4:103519487:A:G	5582	0.137077	0.862921
NFKB1	g2	4:103519487:A:G	5582	0.154737	0.845263
KIF3C	g0	2:26139430:C:T	4795	0.22363	0.776329
TBKBP1	g2	17:45794706:A:G	5227	0.303044	0.696873
ENTHD2	g0	17:79261809:A:C	7538	0.433057	0.566938
WNT3	g0	17:44856485:C:T	4894	0.496628	0.50325
RP11-259G18.3	g0	17:44856485:C:T	4913	0.587836	0.412051
RP11-798G7.5	g0	17:44856485:C:T	5048	0.653731	0.346116
DND1P1	g0	17:44856485:C:T	5033	0.660403	0.339443
AC091132.1	g0	17:44856485:C:T	5210	0.628807	0.32481
LRRC37A2	g0	17:44856485:C:T	4972	0.684215	0.315654
KANSL1-AS1	g0	17:44856485:C:T	4662	0.684374	0.315495
CRHR1-IT1	g0	17:44856485:C:T	5247	0.721938	0.277893
HCG27	g0	6:31119589:G:T	13815	0.755553	0.243525
RP11-259G18.2	g0	17:44856485:C:T	4843	0.81107	0.188775
RP11-707O23.5	g0	17:44856485:C:T	4986	0.833388	0.166417
RP11-259G18.1	g0	17:44856485:C:T	4627	0.837748	0.162092
PSORS1C3	g0	6:31119589:G:T	13752	0.867421	0.131521
LRRC37A4P	g0	17:44856485:C:T	5196	0.879833	0.119961
TBKBP1	g0	17:44856485:C:T	5229	0.885792	0.113288
WNT3	g2	17:45794706:A:G	4894	0.894968	0.104809
PSORS1C3	g2	6:31117075:A:C	13730	0.904043	0.0945415
AZI1	g0	17:79261809:A:C	7591	0.940669	0.0593199
RP11-455O6.2	g0	17:79261809:A:C	6882	0.954971	0.0450175
AP5B1	g1	11:65555524:A:G	3940	0.95351	0.0439012
HLA-C	g0	6:31119589:G:T	15344	0.962162	0.0366632
HCG27	g2	6:31117075:A:C	13792	0.972407	0.0260709
RP11-138I1.3	g1	17:16842991:A:G	4286	0.797995	0.0177147
RAD51C	g2	17:56410041:A:G	4306	0.985607	0.0143525
HLA-C	g2	6:31117075:A:C	15317	0.985003	0.0134549
RP1-150O5.3	g1	1:25291697:C:T	4476	0.782798	0.0123406
RP1-150O5.3	g2	1:25291697:C:T	4476	0.881043	0.0120232
RP1-150O5.3	g0	1:25291697:C:T	4480	0.881474	0.0117551
C6orf47	g2	6:31117075:A:C	15899	0.98677	0.00718143
PDIK1L	g2	1:25291697:C:T	4348	0.844229	0.00557681
PLEKHM1	g0	17:44856485:C:T	5735	0.994435	0.00533251
RP1-187B23.1	g0	1:25291697:C:T	4211	0.934166	0.00452547
RP1-187B23.1	g2	1:25291697:C:T	4211	0.934166	0.00452547
ENTHD2	g2	17:79218714:C:T	7536	0.995479	0.00452075
RP1-187B23.1	g1	1:25291697:C:T	4211	0.934337	0.00434369
CLIC1	g2	6:31117075:A:C	16912	0.95235	0.00415126
AC027601.1	g0	17:79261809:A:C	7060	0.996125	0.00386255
CLIC1	g0	6:31119589:G:T	16987	0.953027	0.00379275
E2F2	g1	1:25291697:C:T	5035	0.886212	0.00374462
TRIM37	g2	17:56410041:A:G	3712	0.996466	0.00349294
ZBTB12	g2	6:31117075:A:C	17594	0.845769	0.00344538
PDIK1L	g0	1:25291697:C:T	4348	0.952353	0.00263984
ZBTB12	g0	6:31119589:G:T	17669	0.846937	0.00250919
C6orf47	g0	6:31119589:G:T	15955	0.99176	0.00250463
MDS2	g1	1:25291697:C:T	4702	0.886568	0.00235068
PLCD3	g0	17:44856485:C:T	6055	0.786295	0.00234337
ID3	g1	1:25291697:C:T	5125	0.887345	0.00233347
RP11-498C9.15	g2	17:79218714:C:T	6990	0.847162	0.00211094
CDC27	g0	17:44856485:C:T	4025	0.927637	0.00210962
AC010150.1	g0	2:26139430:C:T	4324	0.997724	0.00209384
RP4-594I10.3	g2	1:25291697:C:T	4350	0.965682	0.0020629
RP4-594I10.3	g0	1:25291697:C:T	4354	0.965682	0.00206289
RP4-594I10.3	g1	1:25291697:C:T	4350	0.965714	0.00202951
RP11-498C9.15	g0	17:79261809:A:C	6991	0.847227	0.0020237
CTD-2020K17.1	g0	17:44856485:C:T	6047	0.997751	0.00198714
GDPD1	g2	17:56410041:A:G	3542	0.829138	0.00173974
CARD14	g2	17:79218714:C:T	8062	0.892995	0.00171377
CTSW	g1	11:65555524:A:G	3876	0.995646	0.00165167
DNAJA1	g1	9:33129839:A:G	6332	0.890239	0.0014662
AC122129.1	g1	17:16842991:A:G	4122	0.93771	0.00145998
ZFPL1	g1	11:65555524:A:G	4213	0.825282	0.00144932
HSPA1A	g0	6:31119589:G:T	17305	0.98094	0.00141732
PRKAG2-AS1	g2	7:150942349:C:T	5515	0.935129	0.00136029
DNAJA1	g0	9:33128617:A:G	6333	0.890356	0.00133469
DNAJA1	g2	9:33128617:A:G	6332	0.890357	0.00133397
PRKAG2-AS1	g0	7:150942349:C:T	5515	0.935159	0.00133216
PRR3	g2	6:31117075:A:C	18741	0.986177	0.00130731
RBM14	g1	11:65555524:A:G	3858	0.855039	0.00125448
HSPA1A	g2	6:31117075:A:C	17230	0.98079	0.00122488
PRR3	g0	6:31119589:G:T	18758	0.986714	0.00110684
RP11-798G7.6	g0	17:44856485:C:T	5023	0.998667	0.00109903
RP11-867G23.3	g1	11:65555524:A:G	3223	0.926316	0.00106279
HIVEP2	g0	6:143169723:A:G	5563	0.998484	0.00103957
SYVN1	g1	11:65555524:A:G	4148	0.906038	0.000941042
KIF24	g1	9:33129839:A:G	5473	0.946772	0.000935528
SUPT4H1	g2	17:56410041:A:G	4732	0.999038	0.00092107
SIPA1	g1	11:65555524:A:G	4015	0.996376	0.000918845
NUDT2	g1	9:33129839:A:G	5445	0.931034	0.000875924
RP11-398K22.12	g2	6:74230859:C:T	6164	0.966509	0.000807118
TCF19	g2	6:31117075:A:C	13869	0.997697	0.000741198
PBX2	g0	6:31119589:G:T	17661	0.937188	0.000718331
RP13-766D20.2	g2	17:79218714:C:T	6826	0.95882	0.000699768
RP13-766D20.2	g0	17:79261809:A:C	6827	0.958844	0.000662883
C11orf68	g1	11:65555524:A:G	3904	0.996649	0.000646573
MAP3K11	g1	11:65555524:A:G	4020	0.996664	0.000630148
AGPAT1	g0	6:31119589:G:T	17880	0.978191	0.000623642
RP11-456D7.1	g2	17:45794706:A:G	5003	0.966581	0.000579206
CDC27	g2	17:45794706:A:G	4024	0.929525	0.000574506
HOXB9	g2	17:45794706:A:G	5365	0.974624	0.000523311
LINC00243	g0	6:31119589:G:T	16879	0.998339	0.00044412
AC010150.1	g1	2:26139430:C:T	4323	0.999484	0.000416807
ARL17A	g0	17:44856485:C:T	4990	0.999403	0.000406163
RP11-770G2.2	g1	11:65555524:A:G	3495	0.996943	0.000350879
KRT8P26	g1	11:65555524:A:G	3896	0.996957	0.000336863
NEAT1	g1	11:65555524:A:G	4007	0.996973	0.000319357
LTV1	g0	6:143169723:A:G	5521	0.975456	0.000319105
AGER	g0	6:31119589:G:T	17820	0.9764	0.000269848
RP11-148K1.12	g0	7:150942349:C:T	6297	0.979151	0.000268694
RP11-148K1.12	g2	7:150942349:C:T	6296	0.979148	0.000267882
HLA-L	g2	6:31117075:A:C	15591	0.998178	0.000265541
SCRN2	g2	17:45794706:A:G	5130	0.999467	0.000243842
MRPL45P2	g2	17:45794706:A:G	4317	0.999493	0.000232985
MRPL45P2	g0	17:44856485:C:T	4319	0.998795	0.000221439
FAM195B	g0	17:79261809:A:C	7525	0.971748	0.00021783
RNF5	g0	6:31119589:G:T	17639	0.978474	0.000212653
CTD-2561B21.5	g2	17:79218714:C:T	7692	0.981953	0.000202846
CTD-2561B21.5	g0	17:79261809:A:C	7693	0.981947	0.000197245
LRRC37A	g0	17:44856485:C:T	4807	0.999615	0.000193455
PPT2	g0	6:31119589:G:T	17836	0.97865	0.000183931
RP1-67K17.4	g0	6:143169723:A:G	4728	0.999343	0.000180199
FAM195B	g2	17:79218714:C:T	7523	0.971799	0.000177139
RP11-658F2.8	g1	11:65555524:A:G	3497	0.991862	0.000172887
TUBB	g0	6:31119589:G:T	18200	0.998615	0.000169086
RP11-580I16.2	g2	17:45794706:A:G	4733	0.999361	0.000166914
LINC00243	g2	6:31117075:A:C	16863	0.998281	0.00015878
KRT8P46	g0	4:103519487:A:G	5128	0.99983	0.000157865
LRRC37A15P	g0	4:103519487:A:G	5126	0.99983	0.000157865
RP11-10L12.2	g0	4:103519487:A:G	4903	0.99983	0.000157864
MICB	g2	6:31117075:A:C	14914	0.99828	0.000156133
HLA-L	g0	6:31119589:G:T	15601	0.998631	0.000155789
RP11-334C17.5	g0	17:79261809:A:C	7499	0.986162	0.000149955
GTF2H4	g2	6:31117075:A:C	15907	0.99829	0.000148478
RP11-580I16.2	g0	17:44856485:C:T	4735	0.998677	0.000141566
MRPL49	g1	11:65555524:A:G	4151	0.997152	0.000139847
LST1	g2	6:31117075:A:C	14902	0.998302	0.000134173
CDCA5	g1	11:65555524:A:G	4229	0.98992	0.000130693
HSPA1L	g2	6:31117075:A:C	17363	0.998306	0.00012615
RP11-798G7.8	g0	17:44856485:C:T	5057	0.999643	0.000123076
KCNK7	g1	11:65555524:A:G	4038	0.997172	0.000121303
HCP5	g0	6:31119589:G:T	14634	0.99866	0.000119979
ASXL2	g0	2:26139430:C:T	4933	0.999698	0.000118818
LSM2	g2	6:31117075:A:C	17351	0.998319	0.000113795
GTF2H4	g0	6:31119589:G:T	15925	0.99867	0.000112264
CD248	g1	11:65555524:A:G	3705	0.981891	0.000111191
KAT5	g1	11:65555524:A:G	3938	0.997186	0.000106361
TUBB	g2	6:31117075:A:C	18183	0.998339	0.000101382
TM7SF2	g1	11:65555524:A:G	4168	0.997191	0.000101158
ZDHHC24	g1	11:65555524:A:G	3748	0.997194	9.97e-05
FLOT1	g0	6:31119589:G:T	17992	0.998688	9.63e-05
EGFL8	g0	6:31119589:G:T	35392	0.989197	9.52e-05
HLA-B	g2	6:31117075:A:C	14269	0.998343	9.35e-05
ABHD16A	g2	6:31117075:A:C	16119	0.995734	9.24e-05
APOM	g0	6:31119589:G:T	15908	0.998685	9.16e-05
TRIM39	g0	6:31119589:G:T	16736	0.998695	9.03e-05
DOPEY2	g2	21:36567726:C:T	7239	0.991735	8.75e-05
ABHD16A	g0	6:31119589:G:T	16191	0.996085	8.46e-05
MDC1	g2	6:31117075:A:C	18308	0.998356	8.43e-05
SGSH	g0	17:79261809:A:C	7569	0.995949	8.33e-05
TCF19	g0	6:31119589:G:T	13888	0.9987	8.08e-05
NRM	g2	6:31117075:A:C	20033	0.998362	7.89e-05
HCG18	g2	6:31117075:A:C	16928	0.998365	7.86e-05
SCYL1	g1	11:65555524:A:G	4031	0.997214	7.78e-05
ARL2	g1	11:65555524:A:G	4200	0.997215	7.69e-05
RELA	g1	11:65555524:A:G	3999	0.995617	7.67e-05
RP1-95L4.4	g0	6:143169723:A:G	4972	0.998395	7.65e-05
NCR3	g0	6:31119589:G:T	14933	0.998708	7.19e-05
EIF1AD	g1	11:65555524:A:G	3816	0.997226	6.82e-05
NCR3	g2	6:31117075:A:C	14905	0.998368	6.8e-05
MKS1	g2	17:56410041:A:G	4818	0.999869	6.77e-05
SAPCD1	g2	6:31117075:A:C	16980	0.997441	6.75e-05
DRAP1	g1	11:65555524:A:G	3900	0.997228	6.6e-05
HCP5	g2	6:31117075:A:C	14606	0.998372	6.41e-05
PPP2R5B	g1	11:65555524:A:G	4154	0.997227	6.31e-05
AP000769.1	g1	11:65555524:A:G	3593	0.99723	6.23e-05
GOSR2	g2	17:45794706:A:G	4401	0.999681	6.21e-05
POU5F1	g2	6:31117075:A:C	13730	0.998376	6.11e-05
HSPA1L	g0	6:31119589:G:T	17438	0.998716	6.08e-05
RP11-867G23.8	g1	11:65555524:A:G	3300	0.994693	6.07e-05
APOM	g2	6:31117075:A:C	15853	0.998372	6e-05
NSF	g0	17:44856485:C:T	5253	0.999738	5.97e-05
SETD4	g2	21:36567726:C:T	7326	0.999503	5.91e-05
RP11-755F10.1	g1	11:65555524:A:G	3266	0.997236	5.74e-05
ABCF1	g2	6:31117075:A:C	18742	0.998384	5.73e-05
DHX16	g2	6:31117075:A:C	18726	0.998384	5.69e-05
NFKBIL1	g2	6:31117075:A:C	14886	0.99838	5.6e-05
SAPCD1	g0	6:31119589:G:T	17055	0.997796	5.57e-05
DDX39B	g2	6:31117075:A:C	14685	0.998381	5.52e-05
LSM2	g0	6:31119589:G:T	17426	0.998722	5.5e-05
NRM	g0	6:31119589:G:T	20053	0.998729	5.48e-05
MDC1	g0	6:31119589:G:T	18325	0.998729	5.47e-05
FAM89B	g1	11:65555524:A:G	4053	0.997238	5.45e-05
GPANK1	g2	6:31117075:A:C	15835	0.998377	5.45e-05
CCHCR1	g0	6:31119589:G:T	13946	0.998727	5.42e-05
HIGD1B	g0	17:44856485:C:T	5169	0.996281	5.41e-05
EHD1	g1	11:65555524:A:G	4090	0.997239	5.35e-05
MEN1	g1	11:65555524:A:G	4063	0.997238	5.33e-05
EFCAB13	g2	17:45794706:A:G	4286	0.999673	5.27e-05
DPF2	g1	11:65555524:A:G	4095	0.997241	5.06e-05
PNPO	g2	17:45794706:A:G	5368	0.99966	5.03e-05
TRIM39	g2	6:31117075:A:C	16723	0.998392	5.01e-05
FLOT1	g2	6:31117075:A:C	17975	0.998391	4.93e-05
BRMS1	g1	11:65555524:A:G	3710	0.997247	4.74e-05
SLC25A45	g1	11:65555524:A:G	4059	0.997244	4.74e-05
NEU1	g0	6:31119589:G:T	17536	0.99873	4.68e-05
TRIM10	g0	6:31119589:G:T	14261	0.998671	4.68e-05
SAC3D1	g1	11:65555524:A:G	4190	0.997245	4.66e-05
C2	g2	6:31117075:A:C	17575	0.998386	4.66e-05
TNXA	g0	6:31119589:G:T	16431	0.998732	4.57e-05
C4A	g0	6:31119589:G:T	17620	0.998731	4.56e-05
CYP21A2	g0	6:31119589:G:T	17214	0.998732	4.56e-05
KLC2	g1	11:65555524:A:G	3669	0.997249	4.54e-05
C4B	g0	6:31119589:G:T	17439	0.998732	4.54e-05
CYP21A1P	g0	6:31119589:G:T	17311	0.998732	4.53e-05
NELFE	g2	6:31117075:A:C	17415	0.998388	4.52e-05
NFKBIL1	g0	6:31119589:G:T	14913	0.998735	4.52e-05
ASS1P12	g0	9:33128617:A:G	6441	0.997597	4.52e-05
ASS1P12	g2	9:33128617:A:G	6440	0.997597	4.52e-05
AP003068.18	g1	11:65555524:A:G	3635	0.997246	4.5e-05
MAP4K2	g1	11:65555524:A:G	4068	0.997245	4.5e-05
RIN1	g1	11:65555524:A:G	3712	0.99725	4.46e-05
ATF6B	g0	6:31119589:G:T	17729	0.998733	4.46e-05
SF3B2	g1	11:65555524:A:G	3739	0.99725	4.38e-05
AL020996.1	g0	1:25291697:C:T	4230	0.999388	4.37e-05
AL020996.1	g2	1:25291697:C:T	4230	0.999388	4.37e-05
BATF2	g1	11:65555524:A:G	4175	0.997059	4.3e-05
HLA-B	g0	6:31119589:G:T	14296	0.998738	4.26e-05
AL020996.1	g1	1:25291697:C:T	4230	0.999389	4.25e-05
ABCF1	g0	6:31119589:G:T	18759	0.998742	4.23e-05
MAP3K14-AS1	g0	17:44856485:C:T	6018	0.995604	4.21e-05
LST1	g0	6:31119589:G:T	14930	0.998738	4.21e-05
C6orf136	g2	6:31117075:A:C	20228	0.998399	4.18e-05
KPNB1	g2	17:45794706:A:G	4890	0.999685	4.07e-05
UBE2D3	g0	4:103519487:A:G	5455	0.996792	4.01e-05
CBR3	g2	21:36567726:C:T	7364	0.999522	4e-05
VWA7	g2	6:31117075:A:C	17002	0.998392	3.99e-05
EFCAB13	g0	17:44856485:C:T	4288	0.998976	3.98e-05
NEU1	g2	6:31117075:A:C	17461	0.998393	3.93e-05
XXbac-BPG248L24.11	g2	6:31117075:A:C	13376	0.998397	3.92e-05
C11orf85	g1	11:65555524:A:G	4100	0.99552	3.91e-05
CNIH2	g1	11:65555524:A:G	3628	0.997255	3.89e-05
XXbac-BPG299F13.16	g2	6:31117075:A:C	12948	0.998398	3.88e-05
STK19P	g2	6:31117075:A:C	17443	0.998395	3.87e-05
TRIM10	g2	6:31117075:A:C	14254	0.998377	3.86e-05
EFEMP2	g1	11:65555524:A:G	3860	0.997255	3.85e-05
MICB	g0	6:31119589:G:T	14941	0.998742	3.83e-05
YIF1A	g1	11:65555524:A:G	3672	0.997256	3.81e-05
STK19	g2	6:31117075:A:C	17624	0.998355	3.8e-05
RP11-45M22.5	g1	17:16842991:A:G	4479	0.998472	3.78e-05
ATF6B	g2	6:31117075:A:C	17654	0.998395	3.77e-05
CDC42BPG	g1	11:65555524:A:G	3690	0.997254	3.75e-05
C4B	g2	6:31117075:A:C	17365	0.998396	3.75e-05
FKBPL	g2	6:31117075:A:C	17800	0.998396	3.75e-05
RCAN1	g2	21:36567726:C:T	6182	0.999525	3.71e-05
SLC38A10	g0	17:79261809:A:C	7469	0.999951	3.7e-05
KRT8P46	g2	4:103519487:A:G	5127	0.999961	3.68e-05
LRRC37A15P	g2	4:103519487:A:G	5125	0.999961	3.68e-05
RP11-10L12.2	g2	4:103519487:A:G	4902	0.999961	3.68e-05
TNXA	g2	6:31117075:A:C	16358	0.998398	3.6e-05
RP1-20N2.6	g0	6:143169723:A:G	5166	0.999487	3.59e-05
C4A	g2	6:31117075:A:C	17545	0.998397	3.59e-05
CYP21A2	g2	6:31117075:A:C	17141	0.998397	3.59e-05
PRRT1	g2	6:31117075:A:C	17875	0.996326	3.59e-05
ITGB3	g0	17:44856485:C:T	3935	0.99898	3.58e-05
CYP21A1P	g2	6:31117075:A:C	17237	0.998398	3.58e-05
CAPN1	g1	11:65555524:A:G	4107	0.997256	3.57e-05
C2	g0	6:31119589:G:T	17649	0.998741	3.57e-05
PCNXL3	g1	11:65555524:A:G	3954	0.997258	3.53e-05
FUCA2	g0	6:143169723:A:G	5654	0.999488	3.53e-05
NELFE	g0	6:31119589:G:T	17490	0.998742	3.52e-05
PACS1	g1	11:65555524:A:G	3719	0.997258	3.5e-05
DHX16	g0	6:31119589:G:T	18743	0.998749	3.5e-05
MICA	g2	6:31117075:A:C	14463	0.998401	3.47e-05
TRIM26	g0	6:31119589:G:T	14558	0.998747	3.44e-05
ASS1P12	g1	9:33129839:A:G	6440	0.997608	3.41e-05
EFR3B	g0	2:26139430:C:T	4941	0.999783	3.39e-05
CDC42EP2	g1	11:65555524:A:G	4089	0.997258	3.38e-05
POU5F1	g0	6:31119589:G:T	13751	0.998747	3.38e-05
TIGD3	g1	11:65555524:A:G	4086	0.997258	3.37e-05
AP003068.23	g1	11:65555524:A:G	3922	0.997258	3.37e-05
MSH5	g2	6:31117075:A:C	16988	0.998398	3.37e-05
MSH5	g0	6:31119589:G:T	17063	0.998742	3.37e-05
VWA7	g0	6:31119589:G:T	17077	0.998742	3.34e-05
HCG18	g0	6:31119589:G:T	16942	0.998753	3.34e-05
FIBP	g1	11:65555524:A:G	3891	0.99726	3.33e-05
BBS1	g1	11:65555524:A:G	3748	0.99726	3.32e-05
POLA2	g1	11:65555524:A:G	4065	0.997259	3.31e-05
LY6G6C	g2	6:31117075:A:C	16576	0.998069	3.31e-05
RUNX1	g2	21:36567726:C:T	6882	0.999223	3.27e-05
DOM3Z	g2	6:31117075:A:C	17520	0.9984	3.26e-05
CCHCR1	g2	6:31117075:A:C	13928	0.998405	3.26e-05
NPEPPS	g0	17:44856485:C:T	4847	0.998984	3.24e-05
MB21D1	g2	6:74230859:C:T	6802	0.999888	3.23e-05
KPNB1	g0	17:44856485:C:T	4892	0.998985	3.15e-05
C6orf136	g0	6:31119589:G:T	20248	0.998753	3.15e-05
SPDYC	g1	11:65555524:A:G	4106	0.997261	3.05e-05
RP11-856B14.1	g1	11:65555524:A:G	3612	0.997262	3.01e-05
SLC29A2	g1	11:65555524:A:G	3695	0.997119	3.01e-05
SNX32	g1	11:65555524:A:G	3895	0.997264	2.99e-05
AIF1	g0	6:31119589:G:T	15306	0.998749	2.99e-05
PITHD1	g1	1:25291697:C:T	4960	0.999227	2.94e-05
PRRC2A	g2	6:31117075:A:C	15413	0.998404	2.91e-05
B3GNT1	g1	11:65555524:A:G	3589	0.997265	2.88e-05
CCDC85B	g1	11:65555524:A:G	3894	0.997255	2.87e-05
BZRAP1-AS1	g2	17:56410041:A:G	4396	0.999931	2.86e-05
EHBP1L1	g1	11:65555524:A:G	3921	0.997264	2.84e-05
C6orf48	g0	6:31119589:G:T	17475	0.998748	2.84e-05
RPL11	g1	1:25291697:C:T	4957	0.997723	2.82e-05
ASXL2	g1	2:26139430:C:T	4932	0.999872	2.82e-05
STK19	g0	6:31119589:G:T	17699	0.998709	2.81e-05
LTBP3	g1	11:65555524:A:G	4022	0.997264	2.79e-05
NAALADL1	g1	11:65555524:A:G	4239	0.997264	2.78e-05
DDR1	g2	6:31117075:A:C	16056	0.998411	2.77e-05
AIF1	g2	6:31117075:A:C	15270	0.998407	2.77e-05
HLA-S	g2	6:31117075:A:C	13659	0.998409	2.75e-05
HCG22	g2	6:31117075:A:C	14004	0.99841	2.73e-05
MRPS18B	g2	6:31117075:A:C	18760	0.998413	2.72e-05
PITHD1	g0	1:25291697:C:T	4965	0.999318	2.69e-05
PITHD1	g2	1:25291697:C:T	4961	0.999318	2.68e-05
CTSF	g1	11:65555524:A:G	3792	0.997267	2.63e-05
PAFAH2	g1	1:25291697:C:T	4698	0.99738	2.62e-05
CTD-3074O7.12	g1	11:65555524:A:G	3326	0.997267	2.6e-05
C6orf48	g2	6:31117075:A:C	17400	0.998407	2.56e-05
CCS	g1	11:65555524:A:G	3834	0.997269	2.55e-05
STK19P	g0	6:31119589:G:T	17518	0.998752	2.53e-05
DPP3	g1	11:65555524:A:G	3730	0.997268	2.51e-05
PELI3	g1	11:65555524:A:G	3764	0.997269	2.51e-05
CTD-3074O7.5	g1	11:65555524:A:G	3329	0.997268	2.5e-05
GPANK1	g0	6:31119589:G:T	15892	0.998751	2.5e-05
IER3	g0	6:31119589:G:T	18022	0.998759	2.47e-05
SLC22A20	g1	11:65555524:A:G	3953	0.997267	2.46e-05
CFL1	g1	11:65555524:A:G	3540	0.997269	2.46e-05
MUS81	g1	11:65555524:A:G	3869	0.997269	2.46e-05
TMEM57	g0	1:25291697:C:T	5171	0.999617	2.4e-05
TMEM57	g2	1:25291697:C:T	5171	0.999617	2.4e-05
DOM3Z	g0	6:31119589:G:T	17595	0.998753	2.4e-05
SNX15	g1	11:65555524:A:G	4205	0.997268	2.38e-05
HLA-S	g0	6:31119589:G:T	13686	0.998757	2.33e-05
LY6G6C	g0	6:31119589:G:T	16651	0.998423	2.33e-05
TMEM57	g1	1:25291697:C:T	5171	0.999618	2.3e-05
ATP6V1G2	g2	6:31117075:A:C	14884	0.998413	2.3e-05
RNASEH2C	g1	11:65555524:A:G	3850	0.99727	2.29e-05
RP1-95L4.4	g2	6:143169723:A:G	4970	0.998925	2.29e-05
RP1-95L4.4	g1	6:143169723:A:G	4970	0.998925	2.29e-05
SMARCE1P6	g0	2:26139430:C:T	4030	0.998575	2.27e-05
DDAH2	g0	6:31119589:G:T	16883	0.998753	2.27e-05
SMARCE1P6	g1	2:26139430:C:T	4029	0.998658	2.25e-05
UBE2D3	g2	4:103519487:A:G	5454	0.99682	2.23e-05
PRRC2A	g0	6:31119589:G:T	15454	0.998756	2.22e-05
FAU	g1	11:65555524:A:G	3727	0.997269	2.21e-05
TSGA10IP	g1	11:65555524:A:G	3485	0.997272	2.21e-05
SART1	g1	11:65555524:A:G	3855	0.997272	2.21e-05
ATP6V1G2	g0	6:31119589:G:T	14911	0.998758	2.21e-05
BANF1	g1	11:65555524:A:G	3811	0.997272	2.2e-05
CATSPER1	g1	11:65555524:A:G	3796	0.997273	2.2e-05
ACTN3	g1	11:65555524:A:G	3781	0.997271	2.18e-05
IER3	g2	6:31117075:A:C	18005	0.998419	2.18e-05
TRIM26	g2	6:31117075:A:C	14548	0.998421	2.15e-05
HSPA1B	g2	6:31117075:A:C	17376	0.998411	2.13e-05
RPP21	g0	6:31119589:G:T	16788	0.998764	2.11e-05
EHMT2	g2	6:31117075:A:C	17559	0.998412	2.08e-05
RP11-290H9.4	g0	17:44856485:C:T	3889	0.998996	2.02e-05
SLC17A5	g2	6:74230859:C:T	6613	0.9999	2.01e-05
CBR3-AS1	g2	21:36567726:C:T	6901	0.999542	1.97e-05
HSPA1B	g0	6:31119589:G:T	17451	0.998757	1.97e-05
GOSR2	g0	17:44856485:C:T	4401	0.999645	1.96e-05
MICA	g0	6:31119589:G:T	14491	0.998761	1.96e-05
HCG22	g0	6:31119589:G:T	14021	0.998762	1.96e-05
PRRT1	g0	6:31119589:G:T	17950	0.998534	1.92e-05
DDAH2	g2	6:31117075:A:C	16808	0.998412	1.91e-05
FKBPL	g0	6:31119589:G:T	17875	0.998759	1.88e-05
RP11-455O6.2	g2	17:79218714:C:T	6881	0.999981	1.86e-05
MYL4	g0	17:44856485:C:T	3975	0.998594	1.85e-05
LTB	g0	6:31119589:G:T	14917	0.998762	1.83e-05
SKIV2L	g2	6:31117075:A:C	17642	0.998415	1.82e-05
DDX39B	g0	6:31119589:G:T	14711	0.998762	1.82e-05
AC027601.1	g2	17:79218714:C:T	7059	0.999981	1.81e-05
VARS2	g2	6:31117075:A:C	15973	0.998421	1.79e-05
XXbac-BPG299F13.16	g0	6:31119589:G:T	12971	0.998763	1.79e-05
MRPS18B	g0	6:31119589:G:T	18777	0.998765	1.78e-05
XXbac-BPG248L24.11	g0	6:31119589:G:T	13403	0.998763	1.74e-05
BAG6	g2	6:31117075:A:C	15683	0.998415	1.73e-05
BAG6	g0	6:31119589:G:T	15732	0.99876	1.69e-05
DDR1	g0	6:31119589:G:T	16073	0.998765	1.68e-05
VARS2	g0	6:31119589:G:T	15991	0.998766	1.64e-05
RPP21	g2	6:31117075:A:C	16773	0.998425	1.62e-05
GNL1	g2	6:31117075:A:C	18725	0.998425	1.61e-05
LY6G5C	g2	6:31117075:A:C	16037	0.998415	1.59e-05
LTB	g2	6:31117075:A:C	14890	0.99842	1.58e-05
EHMT2	g0	6:31119589:G:T	17634	0.998761	1.58e-05
RUNX1	g0	21:36567726:C:T	6882	0.999673	1.57e-05
SKIV2L	g0	6:31119589:G:T	17717	0.998761	1.55e-05
XXbac-BPG249D20.9	g2	6:31117075:A:C	17562	0.998383	1.54e-05
LY6G5B	g2	6:31117075:A:C	16066	0.998416	1.5e-05
LY6G5C	g0	6:31119589:G:T	16096	0.99876	1.5e-05
AP000322.53	g2	21:36567726:C:T	5724	0.999548	1.44e-05
PPP1R18	g2	6:31117075:A:C	18461	0.998427	1.42e-05
GNL1	g0	6:31119589:G:T	18742	0.99877	1.42e-05
CSNK2B	g2	6:31117075:A:C	16023	0.998417	1.41e-05
HLA-E	g2	6:31117075:A:C	18412	0.998427	1.34e-05
TNXB	g2	6:31117075:A:C	17493	0.99842	1.34e-05
MED9	g1	17:16842991:A:G	5226	0.998852	1.32e-05
PRR15L	g2	17:45794706:A:G	5343	0.998514	1.32e-05
XXbac-BPG249D20.9	g0	6:31119589:G:T	17578	0.998729	1.28e-05
TNF	g2	6:31117075:A:C	14887	0.998423	1.27e-05
LTA	g2	6:31117075:A:C	14895	0.998423	1.27e-05
LY6G5B	g0	6:31119589:G:T	16125	0.998763	1.26e-05
CBR1	g2	21:36567726:C:T	7326	0.999549	1.22e-05
MAPT	g0	17:44856485:C:T	4958	0.999726	1.21e-05
RP11-156P1.3	g0	17:44856485:C:T	4015	0.999574	1.21e-05
PPP1R18	g0	6:31119589:G:T	18477	0.998772	1.19e-05
EFTUD2	g0	17:44856485:C:T	5376	0.999356	1.18e-05
RP11-10L12.4	g0	4:103519487:A:G	5406	0.999976	1.16e-05
CSNK2B	g0	6:31119589:G:T	16080	0.998764	1.14e-05
MANBA	g0	4:103519487:A:G	5485	0.999976	1.11e-05
CISD2	g0	4:103519487:A:G	5420	0.999977	1.1e-05
SKAP1	g2	17:45794706:A:G	5257	0.999699	1.09e-05
MTMR4	g2	17:56410041:A:G	4605	0.999948	1.08e-05
HLA-E	g0	6:31119589:G:T	18428	0.998773	1.08e-05
LRRC46	g2	17:45794706:A:G	5368	0.9997	1.04e-05
GPR126	g0	6:143169723:A:G	5268	0.999513	1.04e-05
LTA	g0	6:31119589:G:T	14922	0.99877	1.02e-05
TNF	g0	6:31119589:G:T	14914	0.99877	1.02e-05
TNXB	g0	6:31119589:G:T	17567	0.998767	1.01e-05
NSFP1	g0	17:44856485:C:T	4855	0.999799	9.38e-06
AP000318.2	g2	21:36567726:C:T	5077	0.999443	9.17e-06
GFAP	g0	17:44856485:C:T	5443	0.999444	8.96e-06
VTA1	g0	6:143169723:A:G	5264	0.999514	8.93e-06
BDH2	g0	4:103519487:A:G	5183	0.999979	8.84e-06
MYL4	g2	17:45794706:A:G	3974	0.999265	8.58e-06
AZI1	g2	17:79218714:C:T	7589	0.999992	8.47e-06
ARHGAP27	g0	17:44856485:C:T	5867	0.999758	8.43e-06
ITGB3	g2	17:45794706:A:G	3933	0.999718	8e-06
NPEPPS	g2	17:45794706:A:G	4845	0.999718	7.97e-06
CTD-2377D24.8	g2	17:45794706:A:G	4981	0.999573	7.84e-06
SLC35F6	g0	2:26139430:C:T	4455	0.99981	7.79e-06
CTD-2377D24.6	g2	17:45794706:A:G	5180	0.999694	7.56e-06
UBAP1	g1	9:33129839:A:G	5549	0.999381	7.53e-06
CDK5RAP3	g2	17:45794706:A:G	5303	0.999703	7.29e-06
PRR11	g2	17:56410041:A:G	3334	0.999952	6.9e-06
SLC9B2	g0	4:103519487:A:G	5442	0.999981	6.87e-06
RP11-84D1.1	g2	1:25291697:C:T	4438	0.999919	6.77e-06
RP11-84D1.1	g0	1:25291697:C:T	4440	0.999919	6.77e-06
RP11-84D1.1	g1	1:25291697:C:T	4438	0.999919	6.53e-06
PHACTR2	g0	6:143169723:A:G	5542	0.999517	6.4e-06
AIG1	g0	6:143169723:A:G	5542	0.999517	6.34e-06
CTD-2510F5.4	g2	17:56410041:A:G	3234	0.999954	5.73e-06
ADAT2	g0	6:143169723:A:G	5179	0.999518	5.52e-06
HOXB2	g2	17:45794706:A:G	5339	0.999704	5.49e-06
AL031320.1	g0	6:143169723:A:G	5008	0.999507	5.4e-06
RP11-357H14.19	g2	17:45794706:A:G	5323	0.999704	5.36e-06
RP11-156P1.3	g2	17:45794706:A:G	4014	0.999733	5.13e-06
TNFRSF13B	g1	17:16842991:A:G	5307	0.999863	4.95e-06
NFE2L1	g2	17:45794706:A:G	5076	0.999706	4.88e-06
DTNB	g1	2:26139430:C:T	4425	0.999896	4.88e-06
SP2	g2	17:45794706:A:G	5366	0.999706	4.87e-06
DOPEY2	g0	21:36567726:C:T	7239	0.999575	4.8e-06
COPZ2	g2	17:45794706:A:G	5290	0.999706	4.62e-06
PRSS3	g2	9:33128617:A:G	5651	0.999951	4.52e-06
PRSS3	g0	9:33128617:A:G	5652	0.999951	4.52e-06
GAREML	g0	2:26139430:C:T	4535	0.999813	4.47e-06
RP11-439L18.3	g0	6:143169723:A:G	4788	0.999517	4.45e-06
Y_RNA	g2	6:31117075:A:C	177352	0.999478	4.45e-06
HOXB7	g2	17:45794706:A:G	5355	0.999705	4.27e-06
POMC	g0	2:26139430:C:T	4930	0.999813	4.24e-06
AC003665.1	g2	17:45794706:A:G	5099	0.999647	4.14e-06
CLIC6	g2	21:36567726:C:T	6582	0.999558	4.08e-06
CCDC164	g1	2:26139430:C:T	4501	0.999897	3.99e-06
RP5-890E16.2	g2	17:45794706:A:G	5171	0.999707	3.95e-06
CTB-39G8.3	g0	17:44856485:C:T	5341	0.999762	3.93e-06
KCNE1	g2	21:36567726:C:T	5987	0.999558	3.93e-06
RP11-290H9.4	g2	17:45794706:A:G	3887	0.999722	3.8e-06
KANSL1	g0	17:44856485:C:T	4919	0.999805	3.76e-06
Y_RNA	g0	6:31119589:G:T	177464	0.999593	3.54e-06
HMGCL	g1	1:25291697:C:T	4872	0.999907	3.51e-06
RP11-6N17.3	g2	17:45794706:A:G	5065	0.999707	3.46e-06
MAP3K14	g0	17:44856485:C:T	6136	0.999763	3.44e-06
GAREML	g1	2:26139430:C:T	4534	0.999897	3.44e-06
HADHA	g0	2:26139430:C:T	4629	0.999814	3.35e-06
CCDC164	g0	2:26139430:C:T	4502	0.999814	3.19e-06
DCAKD	g0	17:44856485:C:T	5799	0.99965	3.16e-06
LYPLA2	g1	1:25291697:C:T	4960	0.999908	3.15e-06
GPR113	g0	2:26139430:C:T	4618	0.999814	3.09e-06
RP11-156P1.1	g0	17:44856485:C:T	4059	0.999616	3.07e-06
CTD-2020K17.4	g0	17:44856485:C:T	5580	0.999761	3.06e-06
CENPE	g0	4:103519487:A:G	5473	0.999984	3.06e-06
CTD-2020K17.3	g0	17:44856485:C:T	5668	0.999761	2.95e-06
CBX1	g2	17:45794706:A:G	5033	0.999708	2.88e-06
ARL17B	g0	17:44856485:C:T	4801	0.999806	2.75e-06
SNX11	g2	17:45794706:A:G	5237	0.999708	2.72e-06
BZRAP1	g2	17:56410041:A:G	4760	0.999956	2.68e-06
EPT1	g0	2:26139430:C:T	4599	0.999815	2.67e-06
FAM215B	g0	17:44856485:C:T	4920	0.999806	2.61e-06
MRPL10	g2	17:45794706:A:G	5368	0.999708	2.59e-06
RAB10	g0	2:26139430:C:T	4199	0.999815	2.59e-06
ACBD4	g0	17:44856485:C:T	6105	0.999739	2.57e-06
HADHB	g0	2:26139430:C:T	4658	0.999815	2.57e-06
HEXIM1	g0	17:44856485:C:T	6132	0.999745	2.53e-06
NMT1	g0	17:44856485:C:T	5917	0.999692	2.52e-06
DNAJC27	g0	2:26139430:C:T	5069	0.999815	2.51e-06
RP11-6N17.4	g2	17:45794706:A:G	5110	0.999708	2.48e-06
OSBPL7	g2	17:45794706:A:G	5346	0.999708	2.44e-06
FMNL1	g0	17:44856485:C:T	6209	0.999762	2.41e-06
RNF213	g0	17:79261809:A:C	7828	0.999761	2.36e-06
EFR3B	g1	2:26139430:C:T	4940	0.999898	2.35e-06
HOXB4	g2	17:45794706:A:G	5384	0.999707	2.34e-06
HOXB-AS1	g2	17:45794706:A:G	5006	0.999707	2.31e-06
HOXB3	g2	17:45794706:A:G	5376	0.999707	2.31e-06
RP11-156P1.1	g2	17:45794706:A:G	4058	0.999738	2.29e-06
RP13-890H12.2	g0	17:44856485:C:T	5639	0.999755	2.27e-06
HEXIM2	g0	17:44856485:C:T	6155	0.999753	2.18e-06
DNAJC27-AS1	g0	2:26139430:C:T	4639	0.999815	2.06e-06
DNAJC27-AS1	g1	2:26139430:C:T	4638	0.999899	1.97e-06
SPATA32	g0	17:44856485:C:T	6170	0.999762	1.95e-06
HGS	g0	17:79261809:A:C	7649	0.999986	1.93e-06
DNMT3A	g0	2:26139430:C:T	4876	0.999815	1.91e-06
RNF213	g2	17:79218714:C:T	7826	0.999773	1.87e-06
C17orf89	g0	17:79261809:A:C	7392	0.999986	1.82e-06
OTOF	g0	2:26139430:C:T	4499	0.999816	1.76e-06
DNAJC27	g1	2:26139430:C:T	5068	0.999899	1.63e-06
PTGES3P2	g0	2:26139430:C:T	4433	0.999815	1.6e-06
POMC	g1	2:26139430:C:T	4929	0.999899	1.57e-06
AP000318.2	g0	21:36567726:C:T	5077	0.999909	1.56e-06
DTNB	g0	2:26139430:C:T	4426	0.999816	1.54e-06
EIF3EP1	g2	6:74230859:C:T	6180	0.999919	1.44e-06
KHDC1	g2	6:74230859:C:T	6735	0.999919	1.41e-06
FSCN2	g2	17:79218714:C:T	7564	0.999994	1.38e-06
RP11-10L12.4	g2	4:103519487:A:G	5405	0.999997	1.37e-06
CISD2	g2	4:103519487:A:G	5419	0.999997	1.37e-06
CNR2	g1	1:25291697:C:T	4913	0.999909	1.36e-06
PNRC2	g1	1:25291697:C:T	4458	0.999909	1.35e-06
EPT1	g1	2:26139430:C:T	4598	0.999899	1.35e-06
FSCN2	g0	17:79261809:A:C	7566	0.999982	1.31e-06
RAB10	g1	2:26139430:C:T	4198	0.999899	1.25e-06
SLC39A8	g0	4:103519487:A:G	5718	0.999986	1.25e-06
MANBA	g2	4:103519487:A:G	5484	0.999997	1.19e-06
DDX43	g2	6:74230859:C:T	6816	0.99992	1.08e-06
FUCA1	g1	1:25291697:C:T	4819	0.99991	1.05e-06
OTOF	g1	2:26139430:C:T	4498	0.9999	1.05e-06
RP11-4M23.2	g1	1:25291697:C:T	4681	0.999908	1.04e-06
TCEB3	g1	1:25291697:C:T	5023	0.99991	1.02e-06
KCNQ5	g2	6:74230859:C:T	6245	0.99992	1.02e-06
AC099850.1	g2	17:56410041:A:G	3375	0.999958	9.98e-07
GPR113	g1	2:26139430:C:T	4617	0.9999	9.94e-07
HADHA	g1	2:26139430:C:T	4628	0.9999	9.87e-07
GALE	g1	1:25291697:C:T	4946	0.99991	9.76e-07
HADHB	g1	2:26139430:C:T	4657	0.9999	9.23e-07
PTGES3P2	g1	2:26139430:C:T	4432	0.9999	8.79e-07
RP5-886K2.3	g1	1:25291697:C:T	4526	0.99991	8.75e-07
DNMT3A	g1	2:26139430:C:T	4876	0.9999	8.69e-07
MRPS23	g2	17:56410041:A:G	5324	0.999903	8.48e-07
SLC35F6	g1	2:26139430:C:T	4454	0.9999	8.42e-07
BDH2	g2	4:103519487:A:G	5182	0.999997	7.62e-07
VEZF1	g2	17:56410041:A:G	5239	0.999958	7.61e-07
ABCF2	g2	7:150942349:C:T	6824	0.999995	7.08e-07
SMG8	g2	17:56410041:A:G	3582	0.999959	7.07e-07
MSI2	g2	17:56410041:A:G	5568	0.999958	6.97e-07
CD109	g2	6:74230859:C:T	6995	0.99992	6.87e-07
TEX14	g2	17:56410041:A:G	4416	0.999959	6.41e-07
SETD4	g0	21:36567726:C:T	7326	0.999995	6.28e-07
RNF43	g2	17:56410041:A:G	4721	0.999959	6.22e-07
SLC9B2	g2	4:103519487:A:G	5441	0.999997	6.2e-07
MIR1250	g0	17:79261809:A:C	7311	0.999987	6.08e-07
TSPAN10	g0	17:79261809:A:C	7615	0.999987	6.06e-07
SKA2	g2	17:56410041:A:G	3593	0.999959	5.93e-07
AATK	g0	17:79261809:A:C	7571	0.999987	5.53e-07
2004-09-01	g2	17:56410041:A:G	4592	0.999959	5.51e-07
MPO	g2	17:56410041:A:G	4768	0.999959	5.19e-07
CCDC144A	g1	17:16842991:A:G	4690	0.999974	5.15e-07
PDE6G	g0	17:79261809:A:C	7653	0.999987	5.06e-07
RP11-159D12.9	g2	17:56410041:A:G	4720	0.999959	5.05e-07
CENPE	g2	4:103519487:A:G	5472	0.999998	4.82e-07
MAFG-AS1	g0	17:79261809:A:C	7185	0.999987	4.81e-07
DCAF13	g0	8:103545983:G:T	6674	0.999983	4.81e-07
CTD-2561B21.10	g0	17:79261809:A:C	6978	0.999987	4.77e-07
CTD-2561B21.11	g0	17:79261809:A:C	7086	0.999987	4.77e-07
NCALD	g0	8:103545983:G:T	6422	0.999983	4.56e-07
SLC25A32	g0	8:103545983:G:T	7081	0.999983	4.47e-07
SLC26A11	g0	17:79261809:A:C	8088	0.999954	4.1e-07
PRSS3	g1	9:33129839:A:G	5651	0.999955	4.07e-07
UBR5	g0	8:103545983:G:T	6813	0.999983	4.03e-07
CSNK1D	g0	17:79261809:A:C	6881	0.999982	3.96e-07
OXLD1	g0	17:79261809:A:C	7613	0.999988	3.88e-07
SLC39A8	g2	4:103519487:A:G	5718	0.999998	3.88e-07
GPS1	g0	17:79261809:A:C	7528	0.999965	3.81e-07
MSX2P1	g2	17:56410041:A:G	4870	0.999959	3.8e-07
DYNLL2	g2	17:56410041:A:G	5045	0.999959	3.76e-07
LRRC45	g0	17:79261809:A:C	7489	0.999988	3.71e-07
CUEDC1	g2	17:56410041:A:G	5273	0.999959	3.69e-07
AC132872.1	g0	17:79261809:A:C	6464	0.999985	3.48e-07
RP11-70P17.1	g0	1:25291697:C:T	4335	0.999997	3.4e-07
RP11-70P17.1	g2	1:25291697:C:T	4335	0.999997	3.4e-07
RRM2B	g0	8:103545983:G:T	6789	0.999983	3.39e-07
KB-431C1.3	g0	8:103545983:G:T	6169	0.999983	3.39e-07
KB-431C1.4	g0	8:103545983:G:T	6213	0.999983	3.39e-07
SMARCD3	g2	7:150942349:C:T	6736	0.999995	3.34e-07
MTFR1L	g1	1:25291697:C:T	4757	0.999995	3.3e-07
RP11-70P17.1	g1	1:25291697:C:T	4335	0.999997	3.27e-07
RP13-516M14.1	g0	17:79261809:A:C	6318	0.999972	3.27e-07
MTFR1L	g2	1:25291697:C:T	4757	0.999995	2.93e-07
MTFR1L	g0	1:25291697:C:T	4757	0.999995	2.93e-07
RFNG	g0	17:79261809:A:C	7472	0.999985	2.83e-07
CBR3	g0	21:36567726:C:T	7364	0.999995	2.79e-07
CHMP6	g0	17:79261809:A:C	7847	0.999988	2.74e-07
ENDOV	g0	17:79261809:A:C	7648	0.999988	2.56e-07
UBAP2	g1	9:33129839:A:G	5870	0.99997	2.56e-07
CCDC57	g0	17:79261809:A:C	7373	0.999988	2.53e-07
ATP6V1C1	g0	8:103545983:G:T	6882	0.999983	2.46e-07
CCDC137	g0	17:79261809:A:C	7645	0.999988	2.42e-07
FASN	g0	17:79261809:A:C	7054	0.999988	2.4e-07
AZIN1	g0	8:103545983:G:T	6956	0.999983	2.39e-07
RP11-1055B8.4	g0	17:79261809:A:C	6938	0.999988	2.38e-07
KB-1732A1.1	g0	8:103545983:G:T	6842	0.999983	2.37e-07
KB-1507C5.2	g0	8:103545983:G:T	6780	0.999983	2.37e-07
CTD-2047H16.4	g0	17:79261809:A:C	7177	0.999988	2.32e-07
TMUB1	g2	7:150942349:C:T	6899	0.999996	2.25e-07
KLF10	g0	8:103545983:G:T	6892	0.999983	2.24e-07
UBAP2	g0	9:33128617:A:G	5872	0.99997	2.24e-07
UBAP2	g2	9:33128617:A:G	5870	0.99997	2.24e-07
RP11-1055B8.6	g0	17:79261809:A:C	6882	0.999988	2.2e-07
RP11-1C8.6	g0	8:103545983:G:T	6470	0.999983	2.19e-07
KB-1507C5.4	g0	8:103545983:G:T	6434	0.999983	2.18e-07
BAHCC1	g0	17:79261809:A:C	7351	0.999988	2.12e-07
RP13-1032I1.7	g0	17:79261809:A:C	7181	0.999988	2.1e-07
MRPL12	g0	17:79261809:A:C	7596	0.999988	2.03e-07
BANK1	g0	4:103519487:A:G	6096	0.999987	1.92e-07
BAALC	g0	8:103545983:G:T	6872	0.999983	1.89e-07
DCXR	g0	17:79261809:A:C	7491	0.999988	1.85e-07
RP13-516M14.2	g0	17:79261809:A:C	6487	0.999987	1.81e-07
AC132872.2	g0	17:79261809:A:C	6752	0.999982	1.8e-07
SLC16A3	g0	17:79261809:A:C	6962	0.999987	1.79e-07
FZD6	g0	8:103545983:G:T	6981	0.999983	1.79e-07
RPTOR	g0	17:79261809:A:C	8222	0.999988	1.78e-07
NPTX1	g0	17:79261809:A:C	7605	0.999988	1.77e-07
BAIAP2-AS1	g0	17:79261809:A:C	7767	0.999988	1.66e-07
RP11-4M23.2	g0	1:25291697:C:T	4685	0.999998	1.65e-07
RP11-4M23.2	g2	1:25291697:C:T	4681	0.999998	1.63e-07
AL031320.1	g2	6:143169723:A:G	5006	0.999989	1.54e-07
AL031320.1	g1	6:143169723:A:G	5006	0.999989	1.53e-07
ARL16	g0	17:79261809:A:C	7596	0.999988	1.51e-07
AC127496.1	g0	17:79261809:A:C	7681	0.999988	1.45e-07
NPLOC4	g0	17:79261809:A:C	7664	0.999988	1.45e-07
CBR3-AS1	g0	21:36567726:C:T	6901	0.999995	1.45e-07
GPS1	g2	17:79218714:C:T	7526	0.999977	1.43e-07
U6	g0	8:103545983:G:T	133012	0.999983	1.41e-07
KIF24	g0	9:33128617:A:G	5475	0.999998	1.35e-07
STRA13	g0	17:79261809:A:C	7504	0.999988	1.3e-07
ASPSCR1	g0	17:79261809:A:C	7497	0.999988	1.25e-07
RCAN1	g0	21:36567726:C:T	6183	0.999995	1.25e-07
CBR1	g0	21:36567726:C:T	7326	0.999995	1.25e-07
GIMAP4	g2	7:150942349:C:T	6456	0.999996	1.23e-07
ACTG1	g0	17:79261809:A:C	7538	0.999988	1.19e-07
C17orf70	g0	17:79261809:A:C	7586	0.999988	1.17e-07
SRRM1	g2	1:25291697:C:T	4471	0.999998	1.11e-07
SRRM1	g0	1:25291697:C:T	4475	0.999998	1.11e-07
ATG9B	g2	7:150942349:C:T	6867	0.999992	1.1e-07
GIMAP7	g2	7:150942349:C:T	6344	0.999996	1.07e-07
SRRM1	g1	1:25291697:C:T	4471	0.999998	1.06e-07
LINC00482	g0	17:79261809:A:C	6881	0.999988	1.06e-07
MIR657	g0	17:79261809:A:C	7341	0.999988	1.02e-07
BAIAP2	g0	17:79261809:A:C	7652	0.999988	9.83e-08
AGAP3	g2	7:150942349:C:T	6884	0.999996	9.43e-08
NUDT2	g0	9:33128617:A:G	5447	0.999996	8.97e-08
AP000322.53	g0	21:36567726:C:T	5724	0.999995	7.97e-08
NUB1	g2	7:150942349:C:T	6538	0.999996	6.96e-08
ACTR3C	g2	7:150942349:C:T	6238	0.999996	6.32e-08
RP5-1051J4.4	g2	7:150942349:C:T	6190	0.999996	6.23e-08
GIMAP6	g2	7:150942349:C:T	6520	0.999996	6.21e-08
ATG9B	g0	7:150942349:C:T	6868	0.999997	6.1e-08
RP4-584D14.5	g2	7:150942349:C:T	5679	0.999996	5.93e-08
RP5-1051J4.6	g2	7:150942349:C:T	5887	0.999996	5.87e-08
REPIN1	g2	7:150942349:C:T	6298	0.999996	5.79e-08
RP4-584D14.6	g2	7:150942349:C:T	5552	0.999996	5.51e-08
GIMAP5	g2	7:150942349:C:T	6510	0.999996	5.37e-08
SLC4A2	g2	7:150942349:C:T	6267	0.999996	5.2e-08
RFNG	g2	17:79218714:C:T	7470	0.999997	5.18e-08
NOS3	g2	7:150942349:C:T	6862	0.999996	5.17e-08
LRRC61	g2	7:150942349:C:T	6357	0.999996	5.11e-08
RP13-452N2.1	g2	7:150942349:C:T	6106	0.999996	5.04e-08
CRYGN	g2	7:150942349:C:T	6293	0.999996	4.97e-08
TMEM176A	g2	7:150942349:C:T	6468	0.999996	4.95e-08
WDR86	g2	7:150942349:C:T	6486	0.999996	4.92e-08
CHPF2	g2	7:150942349:C:T	6794	0.999996	4.77e-08
GIMAP1	g2	7:150942349:C:T	6511	0.999996	4.74e-08
ASIC3	g2	7:150942349:C:T	6249	0.999996	4.65e-08
C7orf29	g2	7:150942349:C:T	6342	0.999996	4.55e-08
KCNE1	g0	21:36567726:C:T	5988	0.999995	4.5e-08
RP4-584D14.7	g2	7:150942349:C:T	6142	0.999996	4.44e-08
CLIC6	g0	21:36567726:C:T	6583	0.999995	4.4e-08
RP11-334C17.5	g2	17:79218714:C:T	7498	0.999997	4.36e-08
RARRES2	g2	7:150942349:C:T	6303	0.999996	4.32e-08
FASTK	g2	7:150942349:C:T	6908	0.999996	4.32e-08
TMEM176B	g2	7:150942349:C:T	5853	0.999996	4.21e-08
KCNH2	g2	7:150942349:C:T	6791	0.999996	3.92e-08
ABP1	g2	7:150942349:C:T	6555	0.999996	3.91e-08
ABCB8	g2	7:150942349:C:T	6889	0.999996	3.88e-08
GIMAP2	g2	7:150942349:C:T	6454	0.999996	3.87e-08
RP11-439L18.3	g2	6:143169723:A:G	4786	0.999998	3.86e-08
RP11-511P7.2	g2	7:150942349:C:T	5765	0.999996	3.76e-08
GALNT11	g2	7:150942349:C:T	6385	0.999996	3.71e-08
WDR86-AS1	g2	7:150942349:C:T	6285	0.999996	3.7e-08
RP11-439L18.3	g1	6:143169723:A:G	4786	0.999998	3.59e-08
PRKAG2	g2	7:150942349:C:T	6231	0.999996	3.5e-08
ZNF775	g2	7:150942349:C:T	6172	0.999996	3.48e-08
GIMAP8	g2	7:150942349:C:T	6358	0.999996	3.39e-08
RHEB	g2	7:150942349:C:T	5823	0.999996	3.33e-08
SGSH	g2	17:79218714:C:T	7568	0.999999	2.25e-08
LTV1	g2	6:143169723:A:G	5521	0.999998	2.18e-08
LTV1	g1	6:143169723:A:G	5521	0.999998	2.18e-08
BANK1	g2	4:103519487:A:G	6096	0.999998	1.8e-08
RP13-516M14.2	g2	17:79218714:C:T	6485	1	1.45e-08
PNRC2	g0	1:25291697:C:T	4462	1	8.42e-09
PNRC2	g2	1:25291697:C:T	4458	1	8.4e-09
E2F2	g2	1:25291697:C:T	5036	1	3.28e-09
SEPN1	g1	1:25291697:C:T	4922	1	1.97e-09
E2F2	g0	1:25291697:C:T	5040	1	1.67e-09
HIVEP2	g1	6:143169723:A:G	5560	1	1.46e-09
ASAP3	g2	1:25291697:C:T	5008	1	1.18e-09
TCEA3	g2	1:25291697:C:T	4565	1	1.16e-09
UBAP1	g0	9:33128617:A:G	5551	1	1.11e-09
HIVEP2	g2	6:143169723:A:G	5560	1	6.11e-10
MDS2	g2	1:25291697:C:T	4702	1	4.19e-10
ID3	g2	1:25291697:C:T	5126	1	4.17e-10
RP4-799D16.1	g1	1:25291697:C:T	4471	1	4.11e-10
IFNLR1	g1	1:25291697:C:T	5436	1	2.97e-10
SLC38A10	g2	17:79218714:C:T	7468	1	2.5e-10
TOM1L2	g1	17:16842991:A:G	4820	1	1.44e-10
USP32P1	g1	17:16842991:A:G	4663	1	1.35e-10
SRSF10	g1	1:25291697:C:T	4483	1	1.05e-10
RP3-465N24.5	g1	1:25291697:C:T	4481	1	1.03e-10
TMEM50A	g1	1:25291697:C:T	5176	1	9.65e-11
SDHDP6	g1	1:25291697:C:T	4478	1	9.19e-11
RCAN3	g1	1:25291697:C:T	5066	1	9.16e-11
RHD	g1	1:25291697:C:T	5180	1	8.99e-11
RP11-335G20.7	g1	1:25291697:C:T	4429	1	7.78e-11
RHCE	g1	1:25291697:C:T	5227	1	7.34e-11
RARRES2	g0	7:150942349:C:T	6304	1	6.58e-11
SLC26A11	g2	17:79218714:C:T	8086	1	4.59e-11
MAFG-AS1	g2	17:79218714:C:T	7184	1	4.57e-11
LDLRAP1	g1	1:25291697:C:T	5081	1	3.67e-11
RUNX3	g1	1:25291697:C:T	5111	1	3.63e-11
C1orf63	g1	1:25291697:C:T	5146	1	3.53e-11
CLIC4	g1	1:25291697:C:T	5155	1	3.46e-11
PAQR7	g1	1:25291697:C:T	4897	1	2.96e-11
STMN1	g1	1:25291697:C:T	4823	1	2.94e-11
MAN1C1	g1	1:25291697:C:T	4918	1	2.88e-11
NIPAL3	g1	1:25291697:C:T	5133	1	2.75e-11
STPG1	g1	1:25291697:C:T	5133	1	2.72e-11
PTENP1	g0	9:33128617:A:G	6002	1	2.61e-11
PTENP1	g2	9:33128617:A:G	6000	1	2.61e-11
PTENP1	g1	9:33129839:A:G	6000	1	1.79e-11
ABCF2	g0	7:150942349:C:T	6824	1	1.56e-11
RP13-516M14.1	g2	17:79218714:C:T	6316	1	9.72e-12
TMUB1	g0	7:150942349:C:T	6900	1	8.99e-12
SMARCD3	g0	7:150942349:C:T	6736	1	7.81e-12
NFX1	g2	9:33128617:A:G	6142	1	7.68e-12
NFX1	g0	9:33128617:A:G	6144	1	7.68e-12
CHPF2	g0	7:150942349:C:T	6794	1	7.39e-12
GIMAP4	g0	7:150942349:C:T	6457	1	7.23e-12
C17orf89	g2	17:79218714:C:T	7391	1	6.04e-12
AGAP3	g0	7:150942349:C:T	6885	1	5.98e-12
MDS2	g0	1:25291697:C:T	4706	1	5.92e-12
ID3	g0	1:25291697:C:T	5130	1	5.89e-12
ASAP3	g0	1:25291697:C:T	5012	1	5.66e-12
WDR86	g0	7:150942349:C:T	6486	1	5.47e-12
TCEA3	g0	1:25291697:C:T	4569	1	4.2e-12
RP5-1051J4.4	g0	7:150942349:C:T	6191	1	3.65e-12
MIR1250	g2	17:79218714:C:T	7310	1	3.58e-12
HGS	g2	17:79218714:C:T	7647	1	3.45e-12
TSPAN10	g2	17:79218714:C:T	7614	1	3.26e-12
AATK	g2	17:79218714:C:T	7569	1	3.12e-12
ACTR3C	g0	7:150942349:C:T	6239	1	3.09e-12
OXLD1	g2	17:79218714:C:T	7611	1	3.03e-12
NOS3	g0	7:150942349:C:T	6863	1	2.91e-12
SLC4A2	g0	7:150942349:C:T	6268	1	2.86e-12
GIMAP6	g0	7:150942349:C:T	6521	1	2.79e-12
RP5-1051J4.6	g0	7:150942349:C:T	5888	1	2.75e-12
GIMAP5	g0	7:150942349:C:T	6511	1	2.73e-12
TMEM176B	g0	7:150942349:C:T	5854	1	2.66e-12
RP11-511P7.2	g0	7:150942349:C:T	5766	1	2.65e-12
TMEM176A	g0	7:150942349:C:T	6469	1	2.62e-12
NUB1	g0	7:150942349:C:T	6538	1	2.62e-12
GIMAP1	g0	7:150942349:C:T	6512	1	2.62e-12
GIMAP7	g0	7:150942349:C:T	6345	1	2.55e-12
ABP1	g0	7:150942349:C:T	6556	1	2.49e-12
FASTK	g0	7:150942349:C:T	6909	1	2.26e-12
ASIC3	g0	7:150942349:C:T	6250	1	2.22e-12
RP13-452N2.1	g0	7:150942349:C:T	6106	1	2.19e-12
CRYGN	g0	7:150942349:C:T	6293	1	2.18e-12
RP4-584D14.5	g0	7:150942349:C:T	5680	1	2.16e-12
REPIN1	g0	7:150942349:C:T	6299	1	2.15e-12
CTD-2561B21.10	g2	17:79218714:C:T	6977	1	2.12e-12
CTD-2561B21.11	g2	17:79218714:C:T	7085	1	2.12e-12
LRRC61	g0	7:150942349:C:T	6358	1	2.05e-12
C7orf29	g0	7:150942349:C:T	6343	1	1.98e-12
RP4-584D14.7	g0	7:150942349:C:T	6143	1	1.98e-12
KCNH2	g0	7:150942349:C:T	6792	1	1.95e-12
ABCB8	g0	7:150942349:C:T	6890	1	1.93e-12
RP4-584D14.6	g0	7:150942349:C:T	5553	1	1.92e-12
ZNF775	g0	7:150942349:C:T	6173	1	1.88e-12
WDR86-AS1	g0	7:150942349:C:T	6285	1	1.83e-12
RHEB	g0	7:150942349:C:T	5823	1	1.83e-12
GALNT11	g0	7:150942349:C:T	6385	1	1.82e-12
GIMAP2	g0	7:150942349:C:T	6455	1	1.8e-12
GIMAP8	g0	7:150942349:C:T	6359	1	1.75e-12
PRKAG2	g0	7:150942349:C:T	6231	1	1.74e-12
PDE6G	g2	17:79218714:C:T	7651	1	1.66e-12
AC132872.1	g2	17:79218714:C:T	6462	1	1.6e-12
AC127496.1	g2	17:79218714:C:T	7679	1	1.19e-12
ENDOV	g2	17:79218714:C:T	7646	1	1.04e-12
CHMP6	g2	17:79218714:C:T	7846	1	9.03e-13
CTD-2047H16.4	g2	17:79218714:C:T	7176	1	8.42e-13
RP13-1032I1.7	g2	17:79218714:C:T	7180	1	8.38e-13
LRRC45	g2	17:79218714:C:T	7487	1	8.17e-13
NFX1	g1	9:33129839:A:G	6142	1	7.53e-13
MRPL12	g2	17:79218714:C:T	7594	1	7.21e-13
CSNK1D	g2	17:79218714:C:T	6878	1	6.95e-13
CCDC137	g2	17:79218714:C:T	7643	1	6.75e-13
RPL11	g2	1:25291697:C:T	4958	1	5.99e-13
ARL16	g2	17:79218714:C:T	7594	1	5.85e-13
BAIAP2-AS1	g2	17:79218714:C:T	7765	1	5.35e-13
RP11-335G20.7	g0	1:25291697:C:T	4429	1	5.3e-13
RP11-335G20.7	g2	1:25291697:C:T	4429	1	5.3e-13
STRA13	g2	17:79218714:C:T	7502	1	4.47e-13
DCXR	g2	17:79218714:C:T	7489	1	4.3e-13
NPLOC4	g2	17:79218714:C:T	7662	1	4.26e-13
RPTOR	g2	17:79218714:C:T	8221	1	3.92e-13
NPTX1	g2	17:79218714:C:T	7603	1	3.91e-13
UBE2R2	g2	9:33128617:A:G	6048	1	3.69e-13
UBE2R2	g0	9:33128617:A:G	6050	1	3.69e-13
NT5M	g1	17:16842991:A:G	5469	1	3.63e-13
CCDC57	g2	17:79218714:C:T	7370	1	3.62e-13
RP11-1055B8.6	g2	17:79218714:C:T	6881	1	3.57e-13
BAHCC1	g2	17:79218714:C:T	7349	1	3.52e-13
FASN	g2	17:79218714:C:T	7053	1	3.5e-13
BAIAP2	g2	17:79218714:C:T	7650	1	3.49e-13
SLC16A3	g2	17:79218714:C:T	6959	1	3.42e-13
ACTG1	g2	17:79218714:C:T	7536	1	3.36e-13
ASPSCR1	g2	17:79218714:C:T	7495	1	3.35e-13
C17orf70	g2	17:79218714:C:T	7584	1	3.28e-13
UBE2R2	g1	9:33129839:A:G	6048	1	3.27e-13
FLCN	g1	17:16842991:A:G	9770	1	3.2e-13
LINC00482	g2	17:79218714:C:T	6881	1	3.16e-13
MIR657	g2	17:79218714:C:T	7340	1	3.08e-13
RP11-1055B8.4	g2	17:79218714:C:T	6937	1	3.07e-13
AC132872.2	g2	17:79218714:C:T	6749	1	3.05e-13
TBC1D27	g1	17:16842991:A:G	5211	1	1.91e-13
NUDT2	g2	9:33128617:A:G	5445	1	1.4e-13
KIF24	g2	9:33128617:A:G	5473	1	1.03e-13
TCEB3	g2	1:25291697:C:T	5024	1	8.58e-14
LYPLA2	g2	1:25291697:C:T	4961	1	8.49e-14
FUCA1	g2	1:25291697:C:T	4820	1	8.35e-14
HMGCL	g2	1:25291697:C:T	4873	1	7.93e-14
GALE	g2	1:25291697:C:T	4947	1	6.89e-14
RP5-886K2.3	g2	1:25291697:C:T	4526	1	5.78e-14
CNR2	g2	1:25291697:C:T	4914	1	5.1e-14
RP1-67K17.4	g1	6:143169723:A:G	4725	1	4.68e-14
C17orf76-AS1	g1	17:16842991:A:G	5092	1	4.13e-14
KRT17P1	g1	17:16842991:A:G	4576	1	4.03e-14
SREBF1	g1	17:16842991:A:G	4931	1	3.38e-14
COPS3	g1	17:16842991:A:G	5376	1	3.16e-14
ZNF287	g1	17:16842991:A:G	5148	1	3.11e-14
VTA1	g1	6:143169723:A:G	5261	1	3.04e-14
GPR126	g1	6:143169723:A:G	5265	1	2.98e-14
RP11-524F11.1	g1	17:16842991:A:G	4334	1	2.54e-14
RP11-45M22.6	g1	17:16842991:A:G	4417	1	2.37e-14
AIG1	g1	6:143169723:A:G	5540	1	2.22e-14
RP1-20N2.6	g1	6:143169723:A:G	5164	1	2.16e-14
ZNF624	g1	17:16842991:A:G	5309	1	1.99e-14
FUCA2	g1	6:143169723:A:G	5652	1	1.98e-14
PHACTR2	g1	6:143169723:A:G	5542	1	1.9e-14
RAI1	g1	17:16842991:A:G	4826	1	1.62e-14
ADAT2	g1	6:143169723:A:G	5177	1	1.5e-14
TRPV2	g1	17:16842991:A:G	5100	1	1.47e-14
FAM211A	g1	17:16842991:A:G	5095	1	1.45e-14
MPRIP	g1	17:16842991:A:G	5266	1	1.09e-14
RP11-45M22.1	g1	17:16842991:A:G	5101	1	1.06e-14
PLD6	g1	17:16842991:A:G	5167	1	1e-14
ZSWIM7	g1	17:16842991:A:G	5322	1	9.04e-15
CENPV	g1	17:16842991:A:G	5065	1	9.02e-15
ADORA2B	g1	17:16842991:A:G	5467	1	8.97e-15
TTC19	g1	17:16842991:A:G	5324	1	8.86e-15
PEMT	g1	17:16842991:A:G	5062	1	8.75e-15
PIGL	g1	17:16842991:A:G	5140	1	8.6e-15
RASD1	g1	17:16842991:A:G	5209	1	8.31e-15
NCOR1	g1	17:16842991:A:G	5085	1	8.26e-15
GALE	g0	1:25291697:C:T	4951	1	6.78e-15
RP11-205M20.7	g2	9:33128617:A:G	6493	1	7.97e-16
RP11-205M20.7	g0	9:33128617:A:G	6494	1	7.96e-16
RPL11	g0	1:25291697:C:T	4962	1	7.82e-16
RP5-886K2.3	g0	1:25291697:C:T	4530	1	7.76e-16
RP1-67K17.4	g2	6:143169723:A:G	4725	1	3.39e-16
RP11-205M20.7	g1	9:33129839:A:G	6493	1	2.1e-16
LYPLA2	g0	1:25291697:C:T	4965	1	3.27e-17
HMGCL	g0	1:25291697:C:T	4877	1	3.1e-17
TCEB3	g0	1:25291697:C:T	5028	1	2.65e-17
FUCA1	g0	1:25291697:C:T	4824	1	2.62e-17
CNR2	g0	1:25291697:C:T	4918	1	2.01e-17
PAFAH2	g2	1:25291697:C:T	4698	1	1.84e-17
UBAP1	g2	9:33128617:A:G	5549	1	8.48e-18
RP1-20N2.6	g2	6:143169723:A:G	5164	1	7.42e-18
FUCA2	g2	6:143169723:A:G	5652	1	7.13e-18
PHACTR2	g2	6:143169723:A:G	5542	1	2.01e-18
VTA1	g2	6:143169723:A:G	5261	1	1.23e-18
ADAT2	g2	6:143169723:A:G	5177	1	1.21e-18
GPR126	g2	6:143169723:A:G	5265	1	1.12e-18
AIG1	g2	6:143169723:A:G	5540	1	1.03e-18
RHCE	g2	1:25291697:C:T	5228	1	1.15e-20
RHCE	g0	1:25291697:C:T	5228	1	1.15e-20
NDUFB6	g2	9:33128617:A:G	7332	1	1.08e-20
NDUFB6	g0	9:33128617:A:G	7335	1	1.08e-20
NDUFB6	g1	9:33129839:A:G	7332	1	4.3e-21
PAQR7	g2	1:25291697:C:T	4897	1	3.54e-21
PAQR7	g0	1:25291697:C:T	4897	1	3.54e-21
PAFAH2	g0	1:25291697:C:T	4698	1	1.69e-21
STPG1	g2	1:25291697:C:T	5134	1	5.04e-22
STPG1	g0	1:25291697:C:T	5138	1	5.04e-22
SRSF10	g2	1:25291697:C:T	4483	1	3.32e-25
SRSF10	g0	1:25291697:C:T	4487	1	3.32e-25
APTX	g0	9:33128617:A:G	6946	1	2.99e-27
SMU1	g0	9:33128617:A:G	6796	1	2.99e-27
B4GALT1	g1	9:33129839:A:G	6461	1	1.02e-27
MAN1C1	g2	1:25291697:C:T	4918	1	8.9e-28
MAN1C1	g0	1:25291697:C:T	4918	1	8.78e-28
TMEM50A	g2	1:25291697:C:T	5177	1	6.13e-29
LDLRAP1	g2	1:25291697:C:T	5081	1	5.37e-29
SEPN1	g2	1:25291697:C:T	4922	1	3.44e-29
RUNX3	g2	1:25291697:C:T	5112	1	3.26e-29
RHD	g2	1:25291697:C:T	5181	1	3.09e-29
SDHDP6	g2	1:25291697:C:T	4478	1	2.92e-29
CLIC4	g2	1:25291697:C:T	5156	1	2.57e-29
RP3-465N24.5	g2	1:25291697:C:T	4481	1	1.48e-29
RCAN3	g2	1:25291697:C:T	5067	1	1.47e-29
RP11-176F3.7	g0	9:33128617:A:G	5185	1	8.91e-30
STMN1	g2	1:25291697:C:T	4823	1	5.56e-30
NIPAL3	g2	1:25291697:C:T	5134	1	5.47e-30
RCAN3	g0	1:25291697:C:T	5071	1	5.33e-30
RP4-799D16.1	g2	1:25291697:C:T	4471	1	4.44e-30
C1orf63	g2	1:25291697:C:T	5147	1	4.39e-30
IFNLR1	g2	1:25291697:C:T	5437	1	4.36e-30
BAG1	g0	9:33128617:A:G	6363	1	3.9e-30
AQP3	g0	9:33128617:A:G	6072	1	5.13e-31
RP11-384P7.7	g0	9:33128617:A:G	5525	1	3.22e-31
DCAF12	g0	9:33128617:A:G	5660	1	1.51e-31
ACO1	g0	9:33128617:A:G	7607	1	1.27e-31
NOL6	g0	9:33128617:A:G	6052	1	6.17e-32
B4GALT1	g0	9:33128617:A:G	6465	1	5.97e-32
TOPORS	g0	9:33128617:A:G	7338	1	5.57e-32
TIGD1L2	g0	9:33128617:A:G	6654	1	5.18e-32
DDX58	g0	9:33128617:A:G	7518	1	4.78e-32
RP4-799D16.1	g0	1:25291697:C:T	4471	1	2.12e-33
SEPN1	g0	1:25291697:C:T	4922	1	4.13e-35
TMEM50A	g0	1:25291697:C:T	5177	1	1.71e-35
RHD	g0	1:25291697:C:T	5181	1	4.59e-36
LDLRAP1	g0	1:25291697:C:T	5081	1	4.36e-36
SDHDP6	g0	1:25291697:C:T	4478	1	4.01e-36
CLIC4	g0	1:25291697:C:T	5160	1	3.81e-36
RUNX3	g0	1:25291697:C:T	5116	1	2.62e-36
RP3-465N24.5	g0	1:25291697:C:T	4481	1	1.73e-36
NIPAL3	g0	1:25291697:C:T	5138	1	7.49e-37
STMN1	g0	1:25291697:C:T	4823	1	6.94e-37
IFNLR1	g0	1:25291697:C:T	5441	1	5.81e-37
C1orf63	g0	1:25291697:C:T	5147	1	4.79e-37
SMU1	g2	9:33128617:A:G	6792	1	1.12e-44
APTX	g2	9:33128617:A:G	6942	1	9.9e-45
TOPORS	g2	9:33128617:A:G	7335	1	4.59e-45
TOPORS	g1	9:33129839:A:G	7335	1	6.62e-46
B4GALT1	g2	9:33128617:A:G	6461	1	4.32e-47
RP11-384P7.7	g1	9:33129839:A:G	5524	1	4.02e-47
DCAF12	g1	9:33129839:A:G	5658	1	2.03e-47
BAG1	g1	9:33129839:A:G	6361	1	1.48e-47
ACO1	g1	9:33129839:A:G	7605	1	1.18e-47
NOL6	g1	9:33129839:A:G	6050	1	6.05e-48
SMU1	g1	9:33129839:A:G	6792	1	3.97e-48
APTX	g1	9:33129839:A:G	6942	1	3.91e-48
TIGD1L2	g1	9:33129839:A:G	6653	1	3.35e-48
DDX58	g1	9:33129839:A:G	7516	1	2.87e-48
RP11-176F3.7	g1	9:33129839:A:G	5184	1	2.6e-48
AQP3	g1	9:33129839:A:G	6070	1	2.56e-48
BAG1	g2	9:33128617:A:G	6361	1	2.53e-48
RP11-176F3.7	g2	9:33128617:A:G	5184	1	1.43e-48
RP11-384P7.7	g2	9:33128617:A:G	5524	1	4.17e-49
AQP3	g2	9:33128617:A:G	6070	1	3.22e-49
ACO1	g2	9:33128617:A:G	7605	1	2.02e-49
DCAF12	g2	9:33128617:A:G	5658	1	1.89e-49
NOL6	g2	9:33128617:A:G	6050	1	4.06e-50
TIGD1L2	g2	9:33128617:A:G	6653	1	3.75e-50
DDX58	g2	9:33128617:A:G	7516	1	2.71e-50
Gene- symbol of the gene; Trait- IgG galactosylation trait which was used in the colocalization test; Locus- coordinated of the top SNP in the genomic locus in form of chr:pos:effect allele:other allele (hg19); N SNPs- number of SNPs used in colocalization test; PP.H3- posterior probability for both traits having association with the locus but not sharing the causal variant; PP.H4- posterior prob…
