# Supplementary material for: Mapping of the gene network that regulates glycan clock of ageing
Source: Aging (Albany NY). 2023 Dec 26;15(24):14509–52. doi: 10.18632/aging.205106 (PMC10781487; doi:10.18632/aging.205106)
Supplement: Supplementary Table 3 [file aging-15-205106-s005.xls]

## Sheet: S3
Supplementary Table 3. Results of the colocalization analysis for IgG galactosylation signals and disease signals in the discovered genomic loci.
Disease	Trait	Locus	N SNPs	PP3	PP4	Prioritized gene(s)
Breast Cancer	g0	chr17:43856639-44863413	780	0.053	0.946	ARHGAP27; CRHR1; SPPL2C; MAPT; KANLS1; ARL17B; LRRC37A; NSF; WNT3
COVID-19	g0	chr17:43856639-44863413	1395	0.061	0.93	ARHGAP27; CRHR1; SPPL2C; MAPT; KANLS1; ARL17B; LRRC37A; NSF; WNT3
Systemic Lupus Erythematosus	g0	chr17:43856639-44863413	1195	0.061	0.894	ARHGAP27; CRHR1; SPPL2C; MAPT; KANLS1; ARL17B; LRRC37A; NSF; WNT3
Schizophrenia	g0	chr17:43856639-44863413	1350	0.084	0.838	ARHGAP27; CRHR1; SPPL2C; MAPT; KANLS1; ARL17B; LRRC37A; NSF; WNT3
Systemic Lupus Erythematosus	g1	chr11:65555524-65555524	999	0.182	0.817	OVOL1; AP5B1
Allergy	g1	chr11:65555524-65555524	1009	0.438	0.561	OVOL1; AP5B1
Asthma	g1	chr11:65555524-65555524	1029	0.438	0.56	OVOL1; AP5B1
Primary Biliary Cirrhosis	g0	chr4:103390496-103554821	341	0.658	0.342	NFKB1; MANBA
Primary Biliary Cirrhosis	g2	chr4:103390496-103567348	341	0.678	0.322	NFKB1; MANBA
Hypertension	g0	chr6:143150223-143182742	1447	0.683	0.281	HIVEP2
Hypertension	g1	chr6:143088071-143203591	1445	0.742	0.219	HIVEP2
Lymphocytes	g0	chr4:103390496-103554821	2428	0.882	0.118	NFKB1; MANBA
Lymphocytes	g2	chr4:103390496-103567348	2428	0.892	0.108	NFKB1; MANBA
Hypertension	g2	chr6:143088071-143206826	1445	0.905	0.048	HIVEP2
Asthma	g2	chr4:103390496-103567348	1156	0.924	0.037	NFKB1; MANBA
Hypertension	g2	chr17:45766846-45870129	1753	0.806	0.037	TBKBP1; TBX21
Asthma	g0	chr4:103390496-103554821	1156	0.926	0.035	NFKB1; MANBA
Allergy	g2	chr4:103390496-103567348	1070	0.972	0.028	NFKB1; MANBA
Allergy	g0	chr4:103390496-103554821	1070	0.978	0.022	NFKB1; MANBA
Hdl	g2	chr17:45766846-45870129	604	0.848	0.009	TBKBP1; TBX21
Systemic Lupus Erythematosus	g2	chr6:31117075-31119589	6708	0.938	0.005	HLA region
Chronic kidney disease	g1	chr11:65555524-65555524	1214	0.996	0.002	OVOL1; AP5B1
Schizophrenia	g1	chr11:65555524-65555524	1003	0.981	0.002	OVOL1; AP5B1
Systemic Lupus Erythematosus	g0	chr6:31107733-31164511	6735	0.987	0.002	HLA region
Type 2 Diabetes	g2	chr6:31117075-31119589	830	0.972	0.002	HLA region
Adult-onset Asthma	g0	chr4:103390496-103554821	1077	0.999	0.001	NFKB1; MANBA
Adult-onset Asthma	g2	chr4:103390496-103567348	1077	0.999	0.001	NFKB1; MANBA
Covid	g0	chr6:31107733-31164511	6473	0.983	0.001	HLA region
Covid	g2	chr6:31117075-31119589	6448	0.983	0.001	HLA region
Schizophrenia	g0	chr8:103542538-103550211	1537	0.866	0.001	UBR5; RRM2B; ODF1; KB-1980E6.3
Type 2 Diabetes	g0	chr6:31107733-31164511	833	0.974	0.001	HLA region
Adult-onset Asthma	g0	chr1:24699711-25493756	1323	1	0	RUNX3
Adult-onset Asthma	g0	chr17:43856639-44863413	1409	0.999	0	ARHGAP27; CRHR1; SPPL2C; MAPT; KANLS1; ARL17B; LRRC37A; NSF; WNT3
Adult-onset Asthma	g0	chr17:79173398-79268562	1957	1	0	AZI1; ENTHD2; SLC38A10; C17orf89
Adult-onset Asthma	g0	chr21:36564553-36665202	1570	1	0	RUNX1
Adult-onset Asthma	g0	chr2:26109539-26149988	1101	1	0	KIF3C
Adult-onset Asthma	g0	chr6:143150223-143182742	1281	1	0	HIVEP2
Adult-onset Asthma	g0	chr6:31107733-31164511	6190	0.999	0	HLA region
Adult-onset Asthma	g0	chr7:150856165-150969535	1365	1	0	ABCF2; CHPF2; SMARCD3
Adult-onset Asthma	g0	chr8:103542538-103550211	1562	1	0	UBR5; RRM2B; ODF1; KB-1980E6.3
Adult-onset Asthma	g0	chr9:32933492-33375592	1519	1	0	B4GALT1
Adult-onset Asthma	g1	chr11:65555524-65555524	1027	0.997	0	OVOL1; AP5B1
Adult-onset Asthma	g1	chr1:24815444-25397198	1323	1	0	RUNX3
Adult-onset Asthma	g1	chr17:16813994-16875636	1124	1	0	TNFRSF13B
Adult-onset Asthma	g1	chr2:26109539-26149988	1101	1	0	KIF3C
Adult-onset Asthma	g1	chr6:143088071-143203591	1280	1	0	HIVEP2
Adult-onset Asthma	g1	chr9:33102868-33375592	1513	1	0	B4GALT1
Adult-onset Asthma	g2	chr1:24699711-25493756	1323	1	0	RUNX3
Adult-onset Asthma	g2	chr17:45766846-45870129	1110	1	0	TBKBP1; TBX21
Adult-onset Asthma	g2	chr17:79158040-79268562	1960	1	0	AZI1; ENTHD2; SLC38A10; C17orf89
Adult-onset Asthma	g2	chr21:36564553-36611055	1570	1	0	RUNX1
Adult-onset Asthma	g2	chr6:143088071-143206826	1280	1	0	HIVEP2
Adult-onset Asthma	g2	chr6:31117075-31119589	6163	0.998	0	HLA region
Adult-onset Asthma	g2	chr6:74168723-74285118	1443	1	0	EEF1A1; MTO1
Adult-onset Asthma	g2	chr7:150906453-150955662	1365	1	0	ABCF2; CHPF2; SMARCD3
Adult-onset Asthma	g2	chr9:32933492-33385427	1519	1	0	B4GALT1
Allergy	g0	chr1:24699711-25493756	1176	1	0	RUNX3
Allergy	g0	chr21:36564553-36665202	1505	0.984	0	RUNX1
Allergy	g0	chr6:31107733-31164511	5875	0.999	0	HLA region
Allergy	g1	chr1:24815444-25397198	1176	1	0	RUNX3
Allergy	g2	chr1:24699711-25493756	1176	1	0	RUNX3
Allergy	g2	chr21:36564553-36611055	1505	0.983	0	RUNX1
Allergy	g2	chr6:31117075-31119589	5850	0.998	0	HLA region
Asthma	g0	chr1:24699711-25493756	1345	1	0	RUNX3
Asthma	g0	chr21:36564553-36665202	1588	1	0	RUNX1
Asthma	g0	chr6:143150223-143182742	1304	0.993	0	HIVEP2
Asthma	g0	chr6:31107733-31164511	6458	0.999	0	HLA region
Asthma	g1	chr1:24815444-25397198	1345	1	0	RUNX3
Asthma	g1	chr6:143088071-143203591	1303	0.993	0	HIVEP2
Asthma	g2	chr1:24699711-25493756	1345	1	0	RUNX3
Asthma	g2	chr17:45766846-45870129	1114	1	0	TBKBP1; TBX21
Asthma	g2	chr21:36564553-36611055	1588	1	0	RUNX1
Asthma	g2	chr6:143088071-143206826	1303	0.993	0	HIVEP2
Asthma	g2	chr6:31117075-31119589	6427	0.998	0	HLA region
Hdl	g0	chr4:103390496-103554821	770	1	0	NFKB1; MANBA
Hdl	g0	chr6:31107733-31164511	1502	0.999	0	HLA region
Hdl	g0	chr7:150856165-150969535	906	1	0	ABCF2; CHPF2; SMARCD3
Hdl	g2	chr4:103390496-103567348	770	1	0	NFKB1; MANBA
Hdl	g2	chr6:31117075-31119589	1495	0.998	0	HLA region
Hdl	g2	chr7:150906453-150955662	906	0.999	0	ABCF2; CHPF2; SMARCD3
Hypertension	g0	chr1:24699711-25493756	1421	1	0	RUNX3
Hypertension	g0	chr17:43856639-44863413	964	0.989	0	ARHGAP27; CRHR1; SPPL2C; MAPT; KANLS1; ARL17B; LRRC37A; NSF; WNT3
Hypertension	g0	chr17:79173398-79268562	1208	0.989	0	AZI1; ENTHD2; SLC38A10; C17orf89
Hypertension	g0	chr4:103390496-103554821	1624	1	0	NFKB1; MANBA
Hypertension	g0	chr7:150856165-150969535	2107	1	0	ABCF2; CHPF2; SMARCD3
Hypertension	g1	chr1:24815444-25397198	1421	1	0	RUNX3
Hypertension	g2	chr1:24699711-25493756	1421	1	0	RUNX3
Hypertension	g2	chr17:56404349-56418136	1474	1	0	BZRAP1; SUPT4H1; RAD5C1
Hypertension	g2	chr17:79158040-79268562	1246	0.989	0	AZI1; ENTHD2; SLC38A10; C17orf89
Hypertension	g2	chr4:103390496-103567348	1624	1	0	NFKB1; MANBA
Hypertension	g2	chr7:150906453-150955662	2107	1	0	ABCF2; CHPF2; SMARCD3
Inflammatory Bowel Disease	g0	chr6:31107733-31164511	7275	0.999	0	HLA region
Inflammatory Bowel Disease	g2	chr6:31117075-31119589	7243	0.998	0	HLA region
Primary Biliary Cirrhosis	g0	chr6:31107733-31164511	1440	0.999	0	HLA region
Primary Biliary Cirrhosis	g2	chr6:31117075-31119589	1435	0.998	0	HLA region
Rheumatoid Arthritis	g0	chr21:36564553-36665202	1640	0.999	0	RUNX1
Rheumatoid Arthritis	g0	chr6:31107733-31164511	7070	0.999	0	HLA region
Rheumatoid Arthritis	g2	chr21:36564553-36611055	1640	0.999	0	RUNX1
Rheumatoid Arthritis	g2	chr6:31117075-31119589	7040	0.998	0	HLA region
Schizophrenia	g0	chr4:103390496-103554821	1016	1	0	NFKB1; MANBA
Schizophrenia	g0	chr6:31107733-31164511	5808	0.998	0	HLA region
Schizophrenia	g2	chr4:103390496-103567348	1016	1	0	NFKB1; MANBA
Schizophrenia	g2	chr6:31117075-31119589	5772	0.998	0	HLA region
Disease- name of the disease; Trait- IgG galactosylation trait which was used in the colocalization test; Locus- coordinates of the start and stop positions for the genomic locus (hg19); N SNPs- number of SNPs used in colocalization test; PP.H3- posterior probability for both traits having association with the locus but not sharing the causal variant; PP.H4- posterior probability for both traits …
