# Supplementary material for: Mapping of the gene network that regulates glycan clock of ageing
Source: Aging (Albany NY). 2023 Dec 26;15(24):14509–52. doi: 10.18632/aging.205106 (PMC10781487; doi:10.18632/aging.205106)
Supplement: Supplementary Table 4 [file aging-15-205106-s006.xls]

## Sheet: S4
Supplementary Table 4. Raw data results of RT-qPCR for up (VPR) and down (KRAB) regulation of genes KIF3C, NFKB1, MANBA, SLC38A10, TNFRSF13B, and HIVEP2.
Experiment	gRNA	locus	type	t_rep	Ct	Ct_control (HPRT1)
VPR1	sgKIF3C_A	KIF3C	A	1a	23.2946	22.25
VPR1	sgKIF3C_A	KIF3C	A	1b	23.2532	22.2376
VPR1	sgKIF3C_A	KIF3C	A	2a	23.1207	22.2133
VPR1	sgKIF3C_A	KIF3C	A	2b	23.1767	22.1842
VPR1	sgKIF3C_A	KIF3C	A	3a	23.1841	22.2092
VPR1	sgKIF3C_A	KIF3C	A	3b	23.1209	22.8287
VPR1	sgKIF3C_A	KIF3C	N	1a	23.8919	22.1026
VPR1	sgKIF3C_A	KIF3C	N	1b	23.977	22.1598
VPR1	sgKIF3C_A	KIF3C	N	2a	23.876	22.0967
VPR1	sgKIF3C_A	KIF3C	N	2b	23.8399	22.0235
VPR1	sgKIF3C_A	KIF3C	N	3a	24.1013	22.2215
VPR1	sgKIF3C_A	KIF3C	N	3b	23.9132	22.2163
VPR1	sgNFKB1_A	NFKB1	A	1a	23.7025	22.546
VPR1	sgNFKB1_A	NFKB1	A	1b	23.8497	22.5303
VPR1	sgNFKB1_A	NFKB1	A	2a	23.4803	22.1005
VPR1	sgNFKB1_A	NFKB1	A	2b	23.4154	22.2677
VPR1	sgNFKB1_A	NFKB1	A	3a	23.3749	22.0268
VPR1	sgNFKB1_A	NFKB1	A	3b	23.3981	22.1624
VPR1	sgNFKB1_A	NFKB1	N	1a	23.6775	22.1026
VPR1	sgNFKB1_A	NFKB1	N	1b	23.7652	22.1598
VPR1	sgNFKB1_A	NFKB1	N	2a	23.6792	22.0967
VPR1	sgNFKB1_A	NFKB1	N	2b	23.6037	22.0235
VPR1	sgNFKB1_A	NFKB1	N	3a	23.73	22.2215
VPR1	sgNFKB1_A	NFKB1	N	3b	23.7594	22.2163
VPR1	sgMANBA_A	MANBA	A	1a	25.2937	22.28
VPR1	sgMANBA_A	MANBA	A	1b	25.138	22.2264
VPR1	sgMANBA_A	MANBA	A	2a	25.151	21.8731
VPR1	sgMANBA_A	MANBA	A	2b	24.6526	21.8628
VPR1	sgMANBA_A	MANBA	A	3a	24.8181	22.0403
VPR1	sgMANBA_A	MANBA	A	3b	24.8448	21.9251
VPR1	sgMANBA_A	MANBA	N	1a	25.5577	22.1026
VPR1	sgMANBA_A	MANBA	N	1b	25.5376	22.1598
VPR1	sgMANBA_A	MANBA	N	2a	25.243	22.0967
VPR1	sgMANBA_A	MANBA	N	2b	25.5274	22.0235
VPR1	sgMANBA_A	MANBA	N	3a	25.5662	22.2215
VPR1	sgMANBA_A	MANBA	N	3b	25.6406	22.2163
VPR1	sgSLC38A10_A	SLC38A10	A	1a	28.1397	22.8792
VPR1	sgSLC38A10_A	SLC38A10	A	1b	28.3514	22.8787
VPR1	sgSLC38A10_A	SLC38A10	A	2a	27.3208	22.0951
VPR1	sgSLC38A10_A	SLC38A10	A	2b	27.4238	22.1937
VPR1	sgSLC38A10_A	SLC38A10	A	3a	27.4647	22.2536
VPR1	sgSLC38A10_A	SLC38A10	A	3b	27.7137	22.3207
VPR1	sgSLC38A10_A	SLC38A10	N	1a	28.6061	22.1026
VPR1	sgSLC38A10_A	SLC38A10	N	1b	27.9322	22.1598
VPR1	sgSLC38A10_A	SLC38A10	N	2a	27.4877	22.0967
VPR1	sgSLC38A10_A	SLC38A10	N	2b	27.6561	22.0235
VPR1	sgSLC38A10_A	SLC38A10	N	3a	27.9982	22.2215
VPR1	sgSLC38A10_A	SLC38A10	N	3b	27.6846	22.2163
VPR1	sgTNFR_A	TNFRSF13B	A	1a	28.7964	22.3382
VPR1	sgTNFR_A	TNFRSF13B	A	1b	29.0252	22.3953
VPR1	sgTNFR_A	TNFRSF13B	A	2a	28.6873	22.4272
VPR1	sgTNFR_A	TNFRSF13B	A	2b	28.6148	22.459
VPR1	sgTNFR_A	TNFRSF13B	A	3a	29.0484	22.1525
VPR1	sgTNFR_A	TNFRSF13B	A	3b	28.7144	22.2711
VPR1	sgTNFR_A	TNFRSF13B	N	1a	37.728	22.1026
VPR1	sgTNFR_A	TNFRSF13B	N	1b	40	22.1598
VPR1	sgTNFR_A	TNFRSF13B	N	2a	35.1752	22.0967
VPR1	sgTNFR_A	TNFRSF13B	N	2b	37.1836	22.0235
VPR1	sgTNFR_A	TNFRSF13B	N	3a	35.0848	22.2215
VPR1	sgTNFR_A	TNFRSF13B	N	3b	40	22.2163
VPR1	sgEEF1A1_A	EEF1A1	A	1a	14.0313	22.39
VPR1	sgEEF1A1_A	EEF1A1	A	1b	13.8898	22.3785
VPR1	sgEEF1A1_A	EEF1A1	A	2a	14.1252	22.3195
VPR1	sgEEF1A1_A	EEF1A1	A	2b	14.0823	22.4096
VPR1	sgEEF1A1_A	EEF1A1	A	3a	14.2031	22.5286
VPR1	sgEEF1A1_A	EEF1A1	A	3b	14.3426	22.5499
VPR1	sgEEF1A1_A	EEF1A1	N	1a	14.5463	22.1026
VPR1	sgEEF1A1_A	EEF1A1	N	1b	14.7086	22.1598
VPR1	sgEEF1A1_A	EEF1A1	N	2a	14.5196	22.0967
VPR1	sgEEF1A1_A	EEF1A1	N	2b	14.6321	22.0235
VPR1	sgEEF1A1_A	EEF1A1	N	3a	14.6065	22.2215
VPR1	sgEEF1A1_A	EEF1A1	N	3b	14.5003	22.2163
VPR1	sgHIVEP2_A	HIVEP2	A	1a	23.6336	22.3103
VPR1	sgHIVEP2_A	HIVEP2	A	1b	23.6578	22.3912
VPR1	sgHIVEP2_A	HIVEP2	A	2a	23.6111	22.003
VPR1	sgHIVEP2_A	HIVEP2	A	2b	23.4787	22.1284
VPR1	sgHIVEP2_A	HIVEP2	A	3a	23.7855	22.4238
VPR1	sgHIVEP2_A	HIVEP2	A	3b	23.4211	22.3851
VPR1	sgHIVEP2_A	HIVEP2	N	1a	23.7102	22.1026
VPR1	sgHIVEP2_A	HIVEP2	N	1b	23.812	22.1598
VPR1	sgHIVEP2_A	HIVEP2	N	2a	23.4722	22.0967
VPR1	sgHIVEP2_A	HIVEP2	N	2b	23.459	22.0235
VPR1	sgHIVEP2_A	HIVEP2	N	3a	23.7339	22.2215
VPR1	sgHIVEP2_A	HIVEP2	N	3b	24.0854	22.2163
KRAB1	sgKIF3C_G	KIF3C	A	1a	25.177	22.7709
KRAB1	sgKIF3C_G	KIF3C	A	1b	25.5937	22.6406
KRAB1	sgKIF3C_G	KIF3C	A	2a	26.9985	23.1462
KRAB1	sgKIF3C_G	KIF3C	A	2b	26.4158	22.6289
KRAB1	sgKIF3C_G	KIF3C	A	3a	27.8566	23.9174
KRAB1	sgKIF3C_G	KIF3C	A	3b	27.8121	23.8612
KRAB1	sgKIF3C_G	KIF3C	N	1a	29.741	27.1693
KRAB1	sgKIF3C_G	KIF3C	N	1b	29.383	27.7222
KRAB1	sgKIF3C_G	KIF3C	N	2a	26.8493	24.7541
KRAB1	sgKIF3C_G	KIF3C	N	2b	26.7968	25.0161
KRAB1	sgKIF3C_G	KIF3C	N	3a	26.0743	25.2089
KRAB1	sgKIF3C_G	KIF3C	N	3b	25.9038	24.0891
KRAB1	sgNFKB1_G	NFKB1	A	1a	26.9278	23.8787
KRAB1	sgNFKB1_G	NFKB1	A	1b	27.2216	23.7278
KRAB1	sgNFKB1_G	NFKB1	A	2a	29.6869	25.5164
KRAB1	sgNFKB1_G	NFKB1	A	2b	29.6529	25.4865
KRAB1	sgNFKB1_G	NFKB1	A	3a	25.2182	22.7819
KRAB1	sgNFKB1_G	NFKB1	A	3b	25.7498	22.6956
KRAB1	sgNFKB1_G	NFKB1	N	1a	29.7067	27.1693
KRAB1	sgNFKB1_G	NFKB1	N	1b	29.3003	27.7222
KRAB1	sgNFKB1_G	NFKB1	N	2a	27.4094	24.7541
KRAB1	sgNFKB1_G	NFKB1	N	2b	27.7546	25.0161
KRAB1	sgNFKB1_G	NFKB1	N	3a	26.6092	25.2089
KRAB1	sgNFKB1_G	NFKB1	N	3b	27.3209	24.0891
KRAB1	sgMANBA_G	MANBA	A	1a	29.5272	23.5849
KRAB1	sgMANBA_G	MANBA	A	1b	28.3686	23.5895
KRAB1	sgMANBA_G	MANBA	A	2a	29.4086	24.8683
KRAB1	sgMANBA_G	MANBA	A	2b	29.3478	24.9511
KRAB1	sgMANBA_G	MANBA	A	3a	30.8154	25.9959
KRAB1	sgMANBA_G	MANBA	A	3b	30.7929	26.8669
KRAB1	sgMANBA_G	MANBA	N	1a	29.8836	27.1693
KRAB1	sgMANBA_G	MANBA	N	1b	29.6503	27.7222
KRAB1	sgMANBA_G	MANBA	N	2a	27.9652	24.7541
KRAB1	sgMANBA_G	MANBA	N	2b	28.1983	25.0161
KRAB1	sgMANBA_G	MANBA	N	3a	27.7437	25.2089
KRAB1	sgMANBA_G	MANBA	N	3b	26.8885	24.0891
KRAB1	sgSLC38A10_G	SLC38A10	A	1a	31.6475	23.2981
KRAB1	sgSLC38A10_G	SLC38A10	A	1b	31.5903	23.3004
KRAB1	sgSLC38A10_G	SLC38A10	A	2a	32.4219	24.0407
KRAB1	sgSLC38A10_G	SLC38A10	A	2b	32.5555	24.0501
KRAB1	sgSLC38A10_G	SLC38A10	A	3a	/	/
KRAB1	sgSLC38A10_G	SLC38A10	A	3b	/	/
KRAB1	sgSLC38A10_G	SLC38A10	N	1a	32.7677	27.1693
KRAB1	sgSLC38A10_G	SLC38A10	N	1b	32.7411	27.7222
KRAB1	sgSLC38A10_G	SLC38A10	N	2a	30.9479	24.7541
KRAB1	sgSLC38A10_G	SLC38A10	N	2b	30.5522	25.0161
KRAB1	sgSLC38A10_G	SLC38A10	N	3a	29.7834	25.2089
KRAB1	sgSLC38A10_G	SLC38A10	N	3b	29.2701	24.0891
KRAB1	sgTNFR_G	TNFRSF13B	A	1a	40	23.6485
KRAB1	sgTNFR_G	TNFRSF13B	A	1b	40	23.5881
KRAB1	sgTNFR_G	TNFRSF13B	A	2a	37.5957	24.4461
KRAB1	sgTNFR_G	TNFRSF13B	A	2b	40	24.3153
KRAB1	sgTNFR_G	TNFRSF13B	A	3a	40	24.4213
KRAB1	sgTNFR_G	TNFRSF13B	A	3b	40	24.4674
KRAB1	sgTNFR_G	TNFRSF13B	N	1a	40	27.1693
KRAB1	sgTNFR_G	TNFRSF13B	N	1b	35.9715	27.7222
KRAB1	sgTNFR_G	TNFRSF13B	N	2a	40	24.7541
KRAB1	sgTNFR_G	TNFRSF13B	N	2b	36.4626	25.0161
KRAB1	sgTNFR_G	TNFRSF13B	N	3a	36.6315	25.2089
KRAB1	sgTNFR_G	TNFRSF13B	N	3b	35.7461	24.0891
KRAB1	sgEEF1A1_A	EEF1A1	A	1a	16.0875	23.2201
KRAB1	sgEEF1A1_A	EEF1A1	A	1b	16.7011	23.2604
KRAB1	sgEEF1A1_A	EEF1A1	A	2a	16.6457	23.6556
KRAB1	sgEEF1A1_A	EEF1A1	A	2b	16.5541	23.6652
KRAB1	sgEEF1A1_A	EEF1A1	A	3a	16.2199	23.9139
KRAB1	sgEEF1A1_A	EEF1A1	A	3b	16.1782	23.9239
KRAB1	sgEEF1A1_A	EEF1A1	N	1a	19.0766	27.1693
KRAB1	sgEEF1A1_A	EEF1A1	N	1b	19.1965	27.7222
KRAB1	sgEEF1A1_A	EEF1A1	N	2a	16.998	24.7541
KRAB1	sgEEF1A1_A	EEF1A1	N	2b	16.9158	25.0161
KRAB1	sgEEF1A1_A	EEF1A1	N	3a	15.7234	25.2089
KRAB1	sgEEF1A1_A	EEF1A1	N	3b	15.8395	24.0891
KRAB1	sgHIVEP2_A	HIVEP2	A	1a	26.5451	24.1731
KRAB1	sgHIVEP2_A	HIVEP2	A	1b	27.2335	23.842
KRAB1	sgHIVEP2_A	HIVEP2	A	2a	27.1607	25.0688
KRAB1	sgHIVEP2_A	HIVEP2	A	2b	27.2961	25.272
KRAB1	sgHIVEP2_A	HIVEP2	A	3a	26.425	23.8027
KRAB1	sgHIVEP2_A	HIVEP2	A	3b	26.5057	24.1306
KRAB1	sgHIVEP2_A	HIVEP2	N	1a	30.2185	27.1693
KRAB1	sgHIVEP2_A	HIVEP2	N	1b	29.6476	27.7222
KRAB1	sgHIVEP2_A	HIVEP2	N	2a	27.2202	24.7541
KRAB1	sgHIVEP2_A	HIVEP2	N	2b	27.3641	25.0161
KRAB1	sgHIVEP2_A	HIVEP2	N	3a	26.1037	25.2089
KRAB1	sgHIVEP2_A	HIVEP2	N	3b	25.6083	24.0891
VPR2	sg_MANBA_A	MANBA	A	1a	25.8505	23.3402
VPR2	sg_MANBA_A	MANBA	A	1b	25.6041	23.2008
VPR2	sg_MANBA_A	MANBA	A	2a	25.4565	23.2265
VPR2	sg_MANBA_A	MANBA	A	2b	25.7951	22.9719
VPR2	sg_MANBA_A	MANBA	A	3a	25.552	23.3327
VPR2	sg_MANBA_A	MANBA	A	3b	25.9054	23.1234
VPR2	sg_MANBA_A	MANBA	A	4a	26.1061	23.6505
VPR2	sg_MANBA_A	MANBA	A	4b	26.2706	23.6283
VPR2	sg_MANBA_A	MANBA	A	5a	25.6611	23.2194
VPR2	sg_MANBA_A	MANBA	A	5b	25.6821	23.2918
VPR2	sg_MANBA_A	MANBA	A	6a	26.1521	23.6314
VPR2	sg_MANBA_A	MANBA	A	6b	26.3399	24.2177
VPR2	sg_MANBA_A	MANBA	N	1a	25.2849	22.775
VPR2	sg_MANBA_A	MANBA	N	1b	25.6216	22.7308
VPR2	sg_MANBA_A	MANBA	N	2a	25.4234	22.9011
VPR2	sg_MANBA_A	MANBA	N	2b	25.562	23.1838
VPR2	sg_MANBA_A	MANBA	N	3a	26.5828	23.5745
VPR2	sg_MANBA_A	MANBA	N	3b	26.2261	23.5561
VPR2	sg_MANBA_A	MANBA	N	4a	26.0596	23.2926
VPR2	sg_MANBA_A	MANBA	N	4b	26.4384	23.4803
VPR2	sg_MANBA_A	MANBA	N	5a	26.1857	23.1607
VPR2	sg_MANBA_A	MANBA	N	5b	25.8383	23.5083
VPR2	sg_MANBA_A	MANBA	N	6a	26.5144	23.8142
VPR2	sg_MANBA_A	MANBA	N	6b	26.5979	23.8267
VPR2	sg_NFKB1_A	NFKB1	A	1a	24.8127	24.2281
VPR2	sg_NFKB1_A	NFKB1	A	1b	25.9765	23.4602
VPR2	sg_NFKB1_A	NFKB1	A	2a	24.5783	23.3242
VPR2	sg_NFKB1_A	NFKB1	A	2b	24.7875	23.3185
VPR2	sg_NFKB1_A	NFKB1	A	3a	25.1564	23.4301
VPR2	sg_NFKB1_A	NFKB1	A	3b	25.1327	23.5264
VPR2	sg_NFKB1_A	NFKB1	A	4a	25.1322	23.3907
VPR2	sg_NFKB1_A	NFKB1	A	4b	25.1246	23.6905
VPR2	sg_NFKB1_A	NFKB1	A	5a	24.695	23.2774
VPR2	sg_NFKB1_A	NFKB1	A	5b	24.7039	23.3509
VPR2	sg_NFKB1_A	NFKB1	A	6a	25.206	23.7424
VPR2	sg_NFKB1_A	NFKB1	A	6b	25.4355	23.9262
VPR2	sg_NFKB1_A	NFKB1	N	1a	24.4808	22.775
VPR2	sg_NFKB1_A	NFKB1	N	1b	24.7137	22.7308
VPR2	sg_NFKB1_A	NFKB1	N	2a	24.5454	22.9011
VPR2	sg_NFKB1_A	NFKB1	N	2b	24.4784	23.1838
VPR2	sg_NFKB1_A	NFKB1	N	3a	25.2396	23.5745
VPR2	sg_NFKB1_A	NFKB1	N	3b	25.1883	23.5561
VPR2	sg_NFKB1_A	NFKB1	N	4a	24.9495	23.2926
VPR2	sg_NFKB1_A	NFKB1	N	4b	24.8049	23.4803
VPR2	sg_NFKB1_A	NFKB1	N	5a	24.7203	23.1607
VPR2	sg_NFKB1_A	NFKB1	N	5b	24.7346	23.5083
VPR2	sg_NFKB1_A	NFKB1	N	6a	26.2047	23.8142
VPR2	sg_NFKB1_A	NFKB1	N	6b	25.7215	23.8267
VPR2	sg_EEF1A1_A	EEF1A1	A	1a	14.8787	23.4731
VPR2	sg_EEF1A1_A	EEF1A1	A	1b	15.1755	23.523
VPR2	sg_EEF1A1_A	EEF1A1	A	2a	15.181	23.6334
VPR2	sg_EEF1A1_A	EEF1A1	A	2b	14.9914	23.9744
VPR2	sg_EEF1A1_A	EEF1A1	A	3a	14.6648	23.0315
VPR2	sg_EEF1A1_A	EEF1A1	A	3b	14.7746	23.3738
VPR2	sg_EEF1A1_A	EEF1A1	A	4a	15.3987	23.872
VPR2	sg_EEF1A1_A	EEF1A1	A	4b	15.442	23.947
VPR2	sg_EEF1A1_A	EEF1A1	A	5a	14.6464	23.1914
VPR2	sg_EEF1A1_A	EEF1A1	A	5b	14.6585	23.3619
VPR2	sg_EEF1A1_A	EEF1A1	A	6a	14.5121	23.0036
VPR2	sg_EEF1A1_A	EEF1A1	A	6b	14.7933	23.2915
VPR2	sg_EEF1A1_A	EEF1A1	N	1a	14.5941	22.775
VPR2	sg_EEF1A1_A	EEF1A1	N	1b	14.7518	22.7308
VPR2	sg_EEF1A1_A	EEF1A1	N	2a	14.613	22.9011
VPR2	sg_EEF1A1_A	EEF1A1	N	2b	14.7594	23.1838
VPR2	sg_EEF1A1_A	EEF1A1	N	3a	15.3009	23.5745
VPR2	sg_EEF1A1_A	EEF1A1	N	3b	15.5185	23.5561
VPR2	sg_EEF1A1_A	EEF1A1	N	4a	15.4593	23.2926
VPR2	sg_EEF1A1_A	EEF1A1	N	4b	15.2249	23.4803
VPR2	sg_EEF1A1_A	EEF1A1	N	5a	14.9162	23.1607
VPR2	sg_EEF1A1_A	EEF1A1	N	5b	14.8255	23.5083
VPR2	sg_EEF1A1_A	EEF1A1	N	6a	15.5819	23.8142
VPR2	sg_EEF1A1_A	EEF1A1	N	6b	15.4759	23.8267
VPR2	sg_HIVEP2_A	HIVEP2	A	1a	23.5766	22.2585
VPR2	sg_HIVEP2_A	HIVEP2	A	1b	23.5158	22.2403
VPR2	sg_HIVEP2_A	HIVEP2	A	2a	22.7117	21.3978
VPR2	sg_HIVEP2_A	HIVEP2	A	2b	22.6408	21.3453
VPR2	sg_HIVEP2_A	HIVEP2	A	3a	23.5903	22.6065
VPR2	sg_HIVEP2_A	HIVEP2	A	3b	23.5106	22.2657
VPR2	sg_HIVEP2_A	HIVEP2	A	4a	23.5577	22.2659
VPR2	sg_HIVEP2_A	HIVEP2	A	4b	23.6936	22.206
VPR2	sg_HIVEP2_A	HIVEP2	A	5a	23.5941	23.7024
VPR2	sg_HIVEP2_A	HIVEP2	A	5b	24.4106	22.9034
VPR2	sg_HIVEP2_A	HIVEP2	A	6a	23.6654	22.4351
VPR2	sg_HIVEP2_A	HIVEP2	A	6b	23.5218	22.2457
VPR2	sg_HIVEP2_A	HIVEP2	N	1a	23.4294	22.2013
VPR2	sg_HIVEP2_A	HIVEP2	N	1b	23.4975	22.3581
VPR2	sg_HIVEP2_A	HIVEP2	N	2a	23.3372	22.039
VPR2	sg_HIVEP2_A	HIVEP2	N	2b	23.2088	22.082
VPR2	sg_HIVEP2_A	HIVEP2	N	3a	24.509	23.4008
VPR2	sg_HIVEP2_A	HIVEP2	N	3b	24.5579	23.4349
VPR2	sg_HIVEP2_A	HIVEP2	N	4a	23.7509	22.5001
VPR2	sg_HIVEP2_A	HIVEP2	N	4b	23.7156	22.4169
VPR2	sg_HIVEP2_A	HIVEP2	N	5a	23.5836	22.3571
VPR2	sg_HIVEP2_A	HIVEP2	N	5b	23.5618	22.3113
VPR2	sg_HIVEP2_A	HIVEP2	N	6a	23.4748	22.3183
VPR2	sg_HIVEP2_A	HIVEP2	N	6b	23.4024	22.3561
VPR2	sg_TNFR_A	TNFRSF13B	A	1a	29.7428	22.8705
VPR2	sg_TNFR_A	TNFRSF13B	A	1b	29.9581	23.0555
VPR2	sg_TNFR_A	TNFRSF13B	A	2a	29.8444	23.2387
VPR2	sg_TNFR_A	TNFRSF13B	A	2b	30.3394	23.3582
VPR2	sg_TNFR_A	TNFRSF13B	A	3a	30.3484	23.0634
VPR2	sg_TNFR_A	TNFRSF13B	A	3b	29.8997	23.2456
VPR2	sg_TNFR_A	TNFRSF13B	A	4a	29.4765	22.7486
VPR2	sg_TNFR_A	TNFRSF13B	A	4b	28.9548	22.8688
VPR2	sg_TNFR_A	TNFRSF13B	A	5a	29.1002	22.824
VPR2	sg_TNFR_A	TNFRSF13B	A	5b	29.2609	22.9555
VPR2	sg_TNFR_A	TNFRSF13B	A	6a	29.5581	23.0425
VPR2	sg_TNFR_A	TNFRSF13B	A	6b	29.8316	23.3164
VPR2	sg_TNFR_A	TNFRSF13B	N	1a	35.3398	22.775
VPR2	sg_TNFR_A	TNFRSF13B	N	1b	40	22.7308
VPR2	sg_TNFR_A	TNFRSF13B	N	2a	40	22.9011
VPR2	sg_TNFR_A	TNFRSF13B	N	2b	37.035	23.1838
VPR2	sg_TNFR_A	TNFRSF13B	N	3a	40	23.5745
VPR2	sg_TNFR_A	TNFRSF13B	N	3b	40	23.5561
VPR2	sg_TNFR_A	TNFRSF13B	N	4a	40	23.2926
VPR2	sg_TNFR_A	TNFRSF13B	N	4b	36.4752	23.4803
VPR2	sg_TNFR_A	TNFRSF13B	N	5a	35.8071	23.1607
VPR2	sg_TNFR_A	TNFRSF13B	N	5b	35.5098	23.5083
VPR2	sg_TNFR_A	TNFRSF13B	N	6a	40	23.8142
VPR2	sg_TNFR_A	TNFRSF13B	N	6b	40	23.8267
KRAB2	sg_EEF1A1_G	EEF1A1	A	1a	15.5481	22.9268
KRAB2	sg_EEF1A1_G	EEF1A1	A	1b	16.2906	22.7341
KRAB2	sg_EEF1A1_G	EEF1A1	A	2a	15.6217	23.2917
KRAB2	sg_EEF1A1_G	EEF1A1	A	2b	15.6831	23.1556
KRAB2	sg_EEF1A1_G	EEF1A1	A	3a	15.4276	23.6181
KRAB2	sg_EEF1A1_G	EEF1A1	A	3b	15.6762	22.9234
KRAB2	sg_EEF1A1_G	EEF1A1	A	4a	15.4339	22.9549
KRAB2	sg_EEF1A1_G	EEF1A1	A	4b	15.6562	23.1643
KRAB2	sg_EEF1A1_G	EEF1A1	A	5a	15.8359	23.6884
KRAB2	sg_EEF1A1_G	EEF1A1	A	5b	15.8942	23.1256
KRAB2	sg_EEF1A1_G	EEF1A1	A	6a	15.7313	23.1
KRAB2	sg_EEF1A1_G	EEF1A1	A	6b	15.7617	23.1
KRAB2	sg_EEF1A1_G	EEF1A1	N	1a	14.9702	23.1734
KRAB2	sg_EEF1A1_G	EEF1A1	N	1b	14.8873	23.305
KRAB2	sg_EEF1A1_G	EEF1A1	N	2a	14.8443	23.1517
KRAB2	sg_EEF1A1_G	EEF1A1	N	2b	14.8983	23.2991
KRAB2	sg_EEF1A1_G	EEF1A1	N	3a	15.0149	23.389
KRAB2	sg_EEF1A1_G	EEF1A1	N	3b	15.2798	23.6429
KRAB2	sg_EEF1A1_G	EEF1A1	N	4a	15.9585	24.3615
KRAB2	sg_EEF1A1_G	EEF1A1	N	4b	15.8465	24.6656
KRAB2	sg_EEF1A1_G	EEF1A1	N	5a	14.8035	23.2873
KRAB2	sg_EEF1A1_G	EEF1A1	N	5b	14.7858	23.3769
KRAB2	sg_EEF1A1_G	EEF1A1	N	6a	14.8775	23.2799
KRAB2	sg_EEF1A1_G	EEF1A1	N	6b	14.8881	23.365
Expr represents one set of experiments while t_rep biological replicate. Values under under the column Ct represent cycle threshold value in RT-qPCR experiments. Type: A – active gRNA; N – non-targeting gRNA (negative control).
