# Supplementary material for: Mapping of the gene network that regulates glycan clock of ageing
Source: Aging (Albany NY). 2023 Dec 26;15(24):14509–52. doi: 10.18632/aging.205106 (PMC10781487; doi:10.18632/aging.205106)
Supplement: Supplementary Table 6 [file aging-15-205106-s008.xls]

## Sheet: S6
Supplementary Table 6. Raw experimental data of 24 glycan traits after gene upregulation (VPR) shown as a percentage of area under chromatogram peaks replicated in two experiments (exp1 and exp2).
Glycan structure	FA1	A2	A2B	FA2	M5	FA2B + additional structure(s)?	A2G	FA2(6)G1	FA2(3)G1	FA2(6)BG1	FA2(3)BG1	A2G2	A2BG2	FA2G2	FA2BG2	FA2(3)G1S1	A2G2S1	FA2G2S1	FA2G2BS1	FA2FG2S1	A2G2S2	A2BG2S2	FA2G2S2	FA2BG2S2	Highest peak intensity (GP4)/EU
	GP1	GP2	GP3	GP4	GP5	GP6	GP7	GP8	GP9	GP10	GP11	GP12	GP13	GP14	GP15	GP16	GP17	GP18	GP19	GP20	GP21	GP22	GP23	GP24
nt_VPR exp1	0.87	0.71	0.4	44.16	1.61	1.29	0.3	25.27	9.85	0.67	0.96	0.52	0.58	7.83	0.19	0.86	0.72	1	0.56	0.38	0.57	0.1	0.32	0.29	47
	0.9	0.86	0.51	44.95	1.62	1.15	0.5	25.59	9.97	0.64	0.99	0.42	0.22	7.37	0.12	0.7	0.64	1.23	0.21	0.23	0.59	0.07	0.27	0.23	40
MANBA_VPR exp1	0.82	0.54	0.49	44.76	1.61	1.38	0.71	23.32	9.45	0.84	0.89	0.9	0.6	7.03	0.4	1.16	1.33	1.2	0.52	0.32	0.94	0.1	0.28	0.39	29
	0.89	0.59	0.76	45.4	1.65	1.53	0.59	23.1	9.2	0.82	0.71	0.74	0.83	6.85	0.5	1	0.94	1	0.38	0.59	0.85	0.12	0.33	0.63	27
	0.88	0.7	0.43	45.68	1.61	1.21	0.54	24.23	9.58	0.69	0.69	0.38	0.36	7.63	0.23	0.79	1.11	1.41	0.35	0.25	0.66	0.09	0.33	0.19	36
NFKB1_VPR exp1	0.91	0.66	0.38	44.7	1.42	1.19	0.76	24.05	9.47	0.69	0.87	0.57	0.43	6.97	0.4	1.34	1.14	1.38	0.59	0.41	0.92	0.23	0.31	0.21	38
	0.92	0.91	0.67	48.48	1.53	1.31	0.78	23.58	8.95	0.75	0.67	0.39	0.21	5.77	0.12	1.25	1.1	0.77	0.49	0.32	0.63	0.05	0.24	0.12	35
	0.89	0.76	0.51	46.04	1.54	1.33	0.54	23.82	9.49	0.72	0.99	0.42	0.58	6.97	0.48	1.34	0.83	1.11	0.29	0.33	0.72	0.07	0.18	0.07	36
EEF1A1_VPR exp1	0.95	0.78	0.47	48.05	1.66	1.18	0.41	23.54	9.15	0.59	0.81	0.49	0.41	6.78	0.2	0.67	0.93	0.79	0.51	0.15	0.79	0.15	0.34	0.2	42
	1.01	0.74	0.66	47.14	1.56	1.13	0.6	23.98	9.35	0.61	0.76	0.43	0.29	7.13	0.16	0.64	1.18	0.78	0.43	0.13	0.63	0.14	0.38	0.14	49
	1.04	0.73	0.6	48.07	1.68	1.31	0.41	23.72	9.14	0.46	0.71	0.26	0.22	7	0.13	0.84	0.78	1	0.34	0.48	0.5	0.1	0.22	0.25	50
HIVEP2_VPR exp1	0.85	0.81	0.7	42.28	1.71	1.32	0.58	25.95	9.55	0.6	0.78	0.45	0.52	8.94	0.42	1.05	0.7	1.06	0.29	0.35	0.49	0.08	0.3	0.24	29
	1.02	0.61	0.77	42.9	1.76	1.48	1.04	25.41	9.81	0.71	0.93	0.43	0.33	8.17	0.11	0.72	0.7	1.08	0.43	0.29	0.71	0.11	0.34	0.14	40
	1.07	0.57	0.86	42.83	1.76	1.55	0.71	24.96	9.52	0.6	0.84	0.49	0.36	8.03	0.32	0.89	1.08	0.97	0.8	0.21	0.71	0.14	0.58	0.15	26
TNFRSF13B_VPR exp1	0.83	0.77	0.54	46.47	1.69	1.45	0.63	24.48	9.67	0.68	0.8	0.36	0.47	6.65	0.17	0.68	0.76	0.8	0.45	0.23	0.66	0.17	0.29	0.28	48
	1.1	0.83	0.71	47.23	1.83	1.67	0.79	22.73	8.93	0.9	0.97	0.51	0.63	5.81	0.21	0.9	0.75	0.97	0.56	0.51	0.78	0.12	0.28	0.29	48
	0.87	0.8	0.66	46.07	1.94	1.52	0.81	22.96	9.05	0.72	1.01	0.67	0.37	5.97	0.62	1.13	1.05	1.29	0.47	0.39	0.89	0.08	0.22	0.42	36
nt_VPR exp2	0.93	0.66	0.3	42.54	1.55	1.27	0.41	27.05	10.76	0.72	0.99	0.37	0.34	7.95	0.18	0.78	0.73	0.81	0.34	0.15	0.51	0.11	0.08	0.47	41
	0.97	0.62	0.32	47.59	1.74	1.25	0.39	24.82	10.15	0.66	0.72	0.32	0.27	6.33	0.14	0.79	0.55	0.87	0.28	0.08	0.43	0.17	0.14	0.38	53
	0.97	0.81	0.64	45.93	1.89	1.43	0.66	23.72	9.79	0.54	0.8	0.45	0.4	6.15	0.24	1.3	0.86	1.25	0.16	0.41	0.54	0.33	0.23	0.49	22
	0.98	0.69	0.32	50.12	1.76	1.26	0.41	23.95	9.71	0.57	0.74	0.32	0.29	5.72	0.13	0.63	0.61	0.75	0.16	0.11	0.34	0.17	0.1	0.2	53
	1.1	0.67	0.42	49.84	1.89	1.58	0.42	23.42	9.56	0.58	0.91	0.44	0.33	5.49	0.18	0.69	0.56	0.78	0.25	0.15	0.33	0.12	0.07	0.21	50
	1.13	0.69	0.35	51.54	1.8	1.2	0.37	22.82	9.35	0.53	0.67	0.3	0.45	5.3	0.12	0.86	0.55	0.72	0.15	0.25	0.38	0.07	0.2	0.17	49
MANBA_VPR exp2	0.94	0.55	0.32	48.45	1.67	1.55	0.6	24.11	9.86	0.68	0.67	0.3	0.3	6.59	0.16	0.77	0.59	0.64	0.26	0.16	0.38	0.1	0.12	0.21	46
	0.94	0.59	0.33	47.45	1.52	1.46	0.69	23.7	9.8	0.71	0.72	0.6	0.5	6.8	0.25	0.91	0.73	0.77	0.39	0.14	0.43	0.08	0.28	0.2	43
	0.91	0.54	0.49	47.88	1.61	1.58	0.42	23.93	9.84	0.63	0.71	0.5	0.36	6.73	0.17	0.71	0.55	0.75	0.43	0.15	0.35	0.19	0.3	0.25	38
	0.92	0.64	0.38	51.2	1.66	1.6	0.5	22.72	9.38	0.73	0.61	0.38	0.23	5.36	0.18	0.63	0.6	0.62	0.24	0.37	0.39	0.28	0.22	0.13	39
	0.95	0.59	0.35	50.08	1.59	1.67	0.45	22.79	9.32	0.68	0.65	0.57	0.39	5.9	0.23	0.87	0.59	0.72	0.26	0.15	0.41	0.1	0.28	0.42	43
	0.99	0.7	0.57	49.2	1.58	1.58	0.52	23.05	9.36	0.7	0.68	0.51	0.35	5.9	0.12	0.68	0.7	1.15	0.41	0.34	0.3	0.23	0.2	0.19	30
NFKB1_VPR exp2	0.83	0.75	0.37	42.63	1.58	1.46	0.41	26.8	10.66	0.65	0.87	0.38	0.31	8.35	0.29	0.82	0.44	0.92	0.21	0.27	0.48	0.1	0.18	0.23	35
	0.98	0.66	0.38	49.9	1.68	1.46	0.54	23.57	9.65	0.67	0.73	0.32	0.31	5.81	0.15	0.66	0.46	0.6	0.32	0.1	0.45	0.15	0.31	0.14	45
	0.96	0.62	0.43	48.97	1.67	1.31	0.44	24	10.02	0.62	0.72	0.27	0.24	6.44	0.2	0.65	0.62	0.64	0.23	0.15	0.4	0.07	0.14	0.19	47
	0.92	0.52	0.35	47.85	1.65	1.39	0.4	24.55	9.69	0.52	0.73	0.42	0.37	6.83	0.2	0.99	0.64	0.76	0.21	0.15	0.42	0.16	0.24	0.06	47
	1	0.71	0.55	46.58	1.83	1.36	0.5	24.68	10.21	0.72	0.66	0.35	0.41	6.95	0.22	0.76	0.64	0.65	0.29	0.13	0.4	0.03	0.1	0.27	42
	1.05	0.64	0.62	47.09	1.79	1.47	0.46	24.89	10.04	0.55	0.69	0.39	0.35	6.56	0.13	0.53	0.57	0.93	0.26	0.12	0.44	0.07	0.15	0.21	42
EEF1A1_VPR exp2	0.84	0.73	0.58	41.98	1.59	1.35	0.34	26.91	10.67	0.58	0.97	0.49	0.21	8.4	0.24	0.92	0.66	0.85	0.46	0.13	0.44	0.17	0.12	0.38	32
	1.06	0.62	0.42	47.98	1.75	1.64	0.42	23.69	9.64	0.53	0.81	0.48	0.36	6.33	0.18	0.59	0.67	1.06	0.49	0.18	0.51	0.05	0.13	0.41	39
	0.93	0.67	0.36	47.7	1.71	1.29	0.39	23.57	9.85	0.58	0.87	0.54	0.52	6.57	0.18	0.97	0.78	1.08	0.33	0.14	0.35	0.11	0.15	0.36	39
	1.11	0.73	0.45	50.45	1.71	1.84	0.53	22.36	9.25	0.51	0.71	0.4	0.36	5.64	0.17	0.77	0.75	0.91	0.34	0.13	0.54	0.07	0.13	0.13	38
	1.3	0.8	0.63	51.82	1.94	1.51	0.44	21.65	8.53	0.46	0.84	0.34	0.36	4.88	0.15	1.07	0.92	1	0.14	0.25	0.51	0.05	0.19	0.21	36
	1.14	0.7	0.44	51.84	1.83	1.54	0.47	22.09	9.11	0.57	0.67	0.35	0.33	5.4	0.19	0.69	0.72	0.71	0.42	0.16	0.34	0.03	0.09	0.17	40
HIVEP2_VPR exp2	0.83	0.47	0.3	45.89	1.59	1.31	0.44	25.52	10.19	0.77	0.74	0.42	0.33	7.45	0.2	0.87	0.76	0.74	0.35	0.07	0.42	0.04	0.1	0.21	40
	0.89	0.62	0.41	45.14	1.8	1.32	0.42	25.35	10.21	0.7	0.81	0.4	0.45	7.57	0.18	0.62	0.81	0.89	0.25	0.19	0.44	0.04	0.14	0.35	39
	1	0.52	0.31	48.88	1.73	1.47	0.42	23.77	9.63	0.62	0.72	0.28	0.31	6.41	0.13	0.83	0.73	0.99	0.32	0.18	0.37	0.07	0.12	0.18	46
	1	0.59	0.47	46.2	1.59	1.92	0.26	24.4	9.69	0.67	0.76	0.44	0.35	6.92	0.13	0.61	1.01	0.97	0.31	0.23	0.63	0.15	0.26	0.43	27
	0.9	1.09	0.44	44.14	1.68	1.82	0.36	25.47	10.14	0.73	1.03	0.74	0.44	7.45	0.27	0.59	0.63	0.73	0.3	0.22	0.31	0.18	0.17	0.16	39
	0.98	0.6	0.49	46.27	1.64	1.34	0.38	24.71	10.21	0.72	0.72	0.43	0.37	7.46	0.17	0.59	0.77	0.96	0.24	0.14	0.39	0.09	0.18	0.14	42
TNFRSF13B_VPR exp2	1	0.64	0.47	49.84	1.85	1.37	0.46	23.51	9.7	0.73	0.7	0.34	0.23	5.7	0.16	0.7	0.57	0.68	0.36	0.22	0.31	0.1	0.12	0.24	49
	1.04	0.68	0.42	49.88	1.76	1.38	0.34	24.07	9.63	0.69	0.73	0.4	0.32	5.55	0.14	0.73	0.63	0.38	0.16	0.18	0.41	0.07	0.11	0.31	47
	0.97	0.62	0.38	48.85	1.82	1.45	0.49	24.32	9.9	0.7	0.71	0.4	0.32	5.86	0.11	0.62	0.53	0.71	0.17	0.15	0.41	0.09	0.14	0.27	61
	0.98	0.78	0.46	49.77	1.94	1.72	0.57	23	9.53	0.67	0.76	0.41	0.28	5.47	0.18	0.65	0.61	0.72	0.38	0.24	0.32	0.1	0.24	0.22	40
	1.07	0.6	0.39	48.83	1.62	1.59	0.38	24	9.92	0.61	0.76	0.35	0.25	6.01	0.21	0.75	0.77	0.7	0.39	0.14	0.25	0.19	0.06	0.17	51
	1.07	0.61	0.42	48.18	1.92	1.48	0.46	24.19	10.18	0.69	0.75	0.42	0.33	6.2	0.15	0.72	0.42	0.76	0.23	0.12	0.26	0.09	0.16	0.19	57
